1 **Plk4 triggers autonomous de novo centriole biogenesis**  
2 **and maturation**

3

4 Catarina Nabais<sup>1</sup>, Delphine Pessoa<sup>1#</sup>, Jorge de-Carvalho<sup>1#</sup>, Thomas van Zanten<sup>2</sup>,  
5 Paulo Duarte<sup>1</sup>, Satyajit Mayor<sup>2</sup>, Jorge Carneiro<sup>1</sup>, Ivo A. Telley<sup>1,§</sup>, and  
6 Mónica Bettencourt-Dias<sup>1,§</sup>

7

8 # equal contribution

9 § co-lead authors

10

11 **Affiliations:**

12 <sup>1</sup> Instituto Gulbenkian de Ciência (IGC), Rua da Quinta Grande, 6, 2780-156 Oeiras,  
13 Portugal.

14 <sup>2</sup> National Centre for Biological Sciences (NCBS), Bellary Road, Bangalore 560065,  
15 Karnataka, Bangalore, India.

16

17 **Correspondence to:**

18 [catarina.p.nabais@gmail.com](mailto:catarina.p.nabais@gmail.com); [itelley@igc.gulbenkian.pt](mailto:itelley@igc.gulbenkian.pt); [mdias@igc.gulbenkian.pt](mailto:mdias@igc.gulbenkian.pt)

19

20 **Keywords:** Centriole, de novo organelle biogenesis, Plk4, molecular switch,  
21 concentration threshold.

22 **Running Title:** Regulation of de novo centriole biogenesis.

## 23 **Abstract**

24 Centrioles form centrosomes and cilia. In most proliferating cells, centrioles assemble  
25 through canonical duplication, which is spatially, temporally and numerically regulated  
26 by the cell cycle and the presence of mature centrioles. However, in certain cell-types,  
27 centrioles assemble de novo, yet by poorly understood mechanisms. Here, we  
28 established a controlled system to investigate de novo centriole biogenesis, using  
29 *Drosophila melanogaster* egg explants overexpressing Polo-like kinase 4 (Plk4), a  
30 trigger for centriole biogenesis. At high Plk4 concentration, centrioles form de novo,  
31 mature and duplicate, independently of cell cycle progression and of the presence of  
32 other centrioles. We show that Plk4 concentration determines the kinetics of centriole  
33 assembly. Moreover, our results suggest Plk4 operates in a switch-like manner to control  
34 the onset of de novo centriole formation, and that distinct biochemical kinetics regulate  
35 de novo and canonical biogenesis. Finally, we investigated which other factors modulate  
36 de novo centriole assembly and reveal that PCM proteins promote biogenesis, likely by  
37 locally concentrating critical components.

## 38 Introduction

39 “(...) *the problem which has interested cytologists and embryologists for many years,*  
40 *namely, whether an ordinarily self-duplicating body may, under certain conditions, seem*  
41 *to be created de novo.*” (Dirksen, 1961): *On The presence of centrioles in artificially*  
42 *activated sea urchin eggs.*

43

44 It was not long after their discovery in cells in the late 1890's (by Boveri and van  
45 Beneden), that scientists began proposing that centrioles were not always assembled  
46 through duplication (Harvey, 1936; Yatsu, 1905). The fascinating discovery that such an  
47 elaborate yet fully functional structure can form without a template, raised a variety of  
48 questions regarding the regulation of organelle biogenesis, many of which stay pertinent  
49 to this date. And while much effort has contributed to our current understanding of the  
50 regulation of pro-centriole assembly next to an already mature, mother structure, much  
51 less is known regarding the “unguided” de novo centriole formation.

52 Centrioles are cylindrical microtubule (MT)-based structures that assemble  
53 centrosomes and cilia in eukaryotic cells. The animal centrosome is typically composed  
54 of two centrioles, surrounded by Pericentriolar Material (PCM), a membrane-less  
55 compartment, which contains hundreds of proteins organised within distinct domains,  
56 that are responsible for anchoring and nucleating MTs (see (Joukov and Nicolo, 2019)  
57 for a thorough review).

58 Centriole biogenesis is usually tightly regulated to ensure a correct organelle copy  
59 number and prevent a variety of human diseases, including cancer and microcephaly  
60 (Bettencourt-Dias et al., 2011; Godinho and Pellman, 2014; Godinho et al., 2014; Levine  
61 et al., 2018; Marteil et al., 2018; Lopes et al., 2018). In proliferating cells, centriole  
62 biogenesis occurs through a canonical pathway synchronous with cell-cycle progression,  
63 called centriole duplication. Accordingly, centrioles begin assembling at G1-S transition,  
64 whereby a single procentriole forms at the proximal side of each of the two mother  
65 centrioles (reviewed in (Nigg and Holland, 2018; Breslow and Holland, 2019). During  
66 mitosis, centrioles undergo centriole-to-centrosome conversion through the recruitment  
67 of Cep135/Bld10, Cep295/Ana1 and Cep152/Asterless (Asl), becoming competent for  
68 duplication in the next cell-cycle (Fu et al., 2016; Izquierdo et al., 2014; Wang et al.,  
69 2011; Tsuchiya et al., 2016). After mitosis, one centrosome is segregated to each  
70 daughter cell. This process entails that the location, timing and number of procentrioles

71 assembled in cycling cells is determined by older/mature centrioles (Banterle and  
72 Gönczy, 2017; Breslow and Holland, 2019).

73 Polo-like kinase 4 (Plk4) is a major player in centriole biogenesis in most animal cells  
74 (Bettencourt-Dias et al., 2005; Habedanck et al., 2005; Kleylein-Sohn et al., 2007).  
75 Depletion or inhibition of its kinase activity prevents centriole formation, while  
76 overexpression leads to the formation of multiple centrioles (Bettencourt-Dias et al.,  
77 2005; Habedanck et al., 2005; Wong et al., 2015). Plk4 activity and function is regulated  
78 by its concentration, which is known to be very low in human cultured cells (Bauer et al.,  
79 2016). As a result, the concentration of active Plk4 must be well-regulated to maintain a  
80 correct centriole number and normal cell-cycle progression. Full Plk4 activity is  
81 accomplished by trans-autophosphorylation of a conserved T-loop residue within its  
82 catalytic domain, which triggers kinase activation through a positive feedback  
83 mechanism (Lopes et al., 2015). It is still not fully understood how Plk4 acquires basal  
84 catalytic activity, but it is likely that other centrosomal proteins regulate this process, such  
85 as its substrates Ana2 and Asl (Klebba et al., 2015b; a; Moyer et al., 2015; Zitouni et al.,  
86 2016; Mclamarrah et al., 2018; Boese et al., 2018; Aydogan et al., 2019). Moreover, at  
87 high concentration, Plk4 self-assembles into nanoscale condensates in *Xenopus*  
88 extracts and in human cultured cells, which may be important for centriole assembly  
89 (Montenegro Gouveia et al., 2018; Yamamoto and Kitagawa, 2019; Park et al., 2019).

90 Centrioles can also form de novo in a variety of cell-types (reviewed in (Nabais et al.,  
91 2018)), but the regulation of this process remains largely unknown. De novo centriole  
92 assembly occurs naturally in organisms that lack centrosomes and generate centrioles  
93 to nucleate motile cilia, such as land plants that produce ciliated sperm (Renzaglia and  
94 Garbary, 2001), several unicellular organisms that alternate between non-flagellated and  
95 flagellated life-cycle states and in animal multiciliated cells, where many centrioles are  
96 produced at once (Dingle and Fulton, 1966; Aldrich, 1967; Fulton and Dingle, 1971;  
97 Grimes, 1973a; b; Mir et al., 1984; Al Jord et al., 2014; Meunier and Azimzadeh, 2016;  
98 Fritz-Laylin et al., 2016; Mercey et al., 2019a; b; Zhao et al., 2019) Furthermore,  
99 centrosomes form de novo in parthenogenetic insects that develop without fertilisation  
100 (Riparbelli et al., 1998; Tram and Sullivan, 2000; Riparbelli and Callaini, 2003). In most  
101 animals, centrioles are lost during female oogenesis and are provided by the sperm upon  
102 fertilisation, as they are needed for embryo development (Rodrigues-martins et al., 2008;  
103 Varmark et al., 2007). However, *Nasonia vitripennis* and *Muscidifurax uniraptor* wasps  
104 (Riparbelli et al., 1998; Tram and Sullivan, 2000; Ferree et al., 2006), *Drosophila*  
105 *mercatorum* flies (Riparbelli and Callaini, 2003) and *Acyrtosiphon pisum* aphids  
106 (Riparbelli et al., 2005) can reproduce in the absence of fertilisation. In these cases,

107 multiple centrosomes form spontaneously in the egg at late stages of meiosis, two of  
108 which are captured for spindle formation and embryo development, thus replacing the  
109 centrioles that are otherwise inherited from the sperm (Tram and Sullivan, 2000).

110 Centrioles can also form de novo in cells that undergo physical, chemical or genetic  
111 perturbations. Proliferating cells are capable of assembling centrioles de novo, but only  
112 after their centrosomes have been physically or chemically removed (Khodjakov et al.,  
113 2002; La Terra et al., 2005; Uetake et al., 2007). *Chlamydomonas reinhardtii* carrying a  
114 mutated centrin copy has defects in centriole segregation giving rise to progeny without  
115 centrioles that, within few generations, reacquire centrioles de novo (Marshall et al.,  
116 2001). Although in these cases there is no strict control over the number of centrioles  
117 formed, it has been proposed that resident centrioles negatively regulate de novo  
118 centriole biogenesis (Marshall et al., 2001), and that such inhibitory effect can be  
119 accomplished by having a single centriole in the cell (La Terra et al., 2005; Lambrus et  
120 al., 2015).

121 In *Drosophila* tissue culture cells, evolutionary conserved centriolar components,  
122 such as Sas6, Sas4 and Bld10, are critical for both canonical and de novo assembly  
123 (Rodrigues-Martins et al., 2007), suggesting that centrioles assembled by both pathways  
124 share their core composition but perhaps differ in their triggering. Despite the wide  
125 spread circumstances in which centrioles form de novo, the regulation and role of older  
126 centrioles on this process have not been addressed. This is in part due to the lack of a  
127 controlled model system suitable for high-resolution time-lapse imaging and amenable  
128 to experimental perturbations.

129 In this study, we investigated the spatio-temporal regulation behind de novo centriole  
130 assembly, including the effect of pre-assembled centrioles on the biogenesis of new  
131 ones, by developing a new experimental system that enabled tracking this process  
132 visually. Plk4 upregulation drives de novo centriole biogenesis in unfertilised *Drosophila*  
133 *melanogaster* eggs (Rodrigues-Martins et al., 2007; Peel et al., 2007). The fly egg is  
134 ideal to study centriole assembly since all the proteins necessary for the first centrosome  
135 and nuclear cycles are maternally inherited and, in the absence of fertilisation, centrioles  
136 are not present. Therefore, centrosomes detected in unfertilised eggs result from de novo  
137 assembly and not from duplication from paternally inherited centrioles. Here, we  
138 accomplished, for the first time, fast live-imaging of de novo centriole assembly with high  
139 spatial resolution, using single-egg cytosolic explants (Telley et al., 2013; de-Carvalho  
140 et al., 2018). We show that, at high Plk4 concentration, centrioles form de novo and then  
141 become competent to duplicate, and that both pathways are concurrent. We present a

142 combination of experiments and mathematical modelling that reveal that de novo  
143 centriole formation occurs independent of pre-existing centrioles. These results  
144 contradict the existing view that resident centrioles generate signals that inhibit de novo  
145 biogenesis. We demonstrate that Plk4 modulates the kinetics of centriole assembly in a  
146 concentration-dependent manner that is suggestive of a switch-like molecular  
147 mechanism. Finally, we find that the PCM, in particular Gamma-tubulin, regulates de  
148 novo biogenesis, suggesting that a local environment of concentrated centriolar and  
149 PCM components is required for de novo centriole assembly.

150

151

## 152 **Results**

### 153 An assay to investigate centriole biogenesis live with high spatio-temporal resolution

154 De novo centriole assembly has remained poorly studied in live samples due to the  
155 lack of a suitable system where the process can be triggered and documented in a timely-  
156 manner. Overexpressing Polo-like kinase 4 (Plk4) drives de novo bona fide centriole  
157 biogenesis, validated by Electron Microscopy (EM), in unfertilised *Drosophila*  
158 *melanogaster* eggs (Rodrigues-Martins et al., 2007), but the onset of the process and its  
159 spatio-temporal dynamics was unknown. Reasons behind this knowledge gap are mostly  
160 imaging-related, for the axial depth is optically limited and greatly impaired by the light  
161 scattering properties of the egg yolk. Therefore, it is currently impossible to visualise  
162 events that take place deep inside the fruit-fly egg, which would otherwise be the ideal  
163 system to address critical questions concerning centriole biogenesis.

164 We set up a cell-free assay that resolves these limitations by generating cell cortex-  
165 free micro-scale explants that can be fully imaged, while retaining the native  
166 characteristics of the cytoplasm in vivo (Fig. 1A, (Telley et al., 2013; de-Carvalho et al.,  
167 2018). Using this assay, we observed de novo centriole biogenesis, at high spatio-  
168 temporal resolution (Fig. 1B,C and Suppl. Movie 1). Germline-specific Plk4  
169 overexpression triggers the formation of multiple centrioles in cytoplasmic explants,  
170 demonstrating that post-meiotic *Drosophila melanogaster* egg extracts are competent  
171 for centriole biogenesis, recapitulating what we had previously observed in the egg (Fig.  
172 1C; (Rodrigues-Martins et al., 2007). Therefore, these extracts offer a powerful assay to  
173 investigate the regulation of centriole assembly.

174 Centrosomes formed in the explants are stable at least within the first hour of the  
175 process, since we never observed centriole elimination during our time-lapse recordings.  
176 We tested several fluorescent protein fly lines in the explants, namely Ana1-Tomato,  
177 GFP-Plk4, Asl-mCherry, Spd2-GFP and Sas6-GFP. We chose Spd2-GFP as our routine  
178 centrosome reporter because its fluorescence signal was brighter and more photostable  
179 across explants than all the others tested. As a result, most experiments in this study  
180 were conducted using this protein reporter.

### 181 De novo formed centrioles mature and acquire the ability to duplicate in the absence 182 of cell cycle progression

183 It was previously proposed that in both human cells (La Terra et al., 2005; Lambrus  
184 et al., 2015) and *Drosophila* eggs (Rodrigues-Martins et al., 2007), centrioles that form  
185 de novo can then duplicate in a canonical fashion. However, this was never confirmed  
186 directly and raises some questions; since centriole duplication is thought to depend on  
187 centriole maturation, a process called centriole-to-centrosome conversion (Wang et al.,  
188 2011; Izquierdo et al., 2014; Fu et al., 2016; Chang et al., 2016) and known to be coupled  
189 to cell cycle progression, which does not occur in eggs (Horner et al., 2006; Vardy and  
190 Orr-Weaver, 2007; Deneke et al., 2019). Thus, we first asked whether de novo formed  
191 centrioles can recruit Ana1 and Asterless (Asl), required for centriole-to-centrosome  
192 conversion, followed by the recruitment of Plk4 and *bona fide* centriole duplication (Fig.  
193 2 and Suppl. Movies 2A–D). Surprisingly, we observed that recently born centrioles  
194 recruit signature molecules characteristic of centriole maturation, such as Ana1 (Fig. 2C)  
195 and Asl (Fig. 2D), in the absence of mitosis (Wang et al., 2011; Izquierdo et al., 2014; Fu  
196 et al., 2016; Chang et al., 2016). Moreover, the trigger of biogenesis, Plk4, is also  
197 recruited to the centrioles (Fig. 2A).

198 Next, we investigated whether centrioles that formed de novo also duplicate, as  
199 predicted by their ability to mature and recruit Plk4. In our assay, single centrioles are  
200 first detected as radially symmetrical intensity spots with Gaussian intensity profile (Fig.  
201 2A,B,C, right). Over time, a single Spd2 Gaussian intensity profile can evolve into a  
202 mixture of at least two Gaussian distributions, consistent with the presence of more than  
203 one diffraction-limited centriole and canonical duplication (intensity line profiles in Fig.  
204 2D). Since image resolution by conventional confocal microscopy is diffraction-limited,  
205 we proceeded to validate centriole duplication using higher resolution techniques.  
206 Validation by EM had previously been performed in intact eggs overexpressing Plk4,  
207 confirming the assembly of structurally normal centrioles (Rodrigues-Martins et al.,  
208 2007). Currently, it is not possible to accomplish EM validation in cytoplasmic droplets

209 since the egg explants are imbedded in halocarbon oil, which is not compatible with  
210 sample processing. Therefore, we resorted to 3D-Structured Illumination Microscopy  
211 (SIM), which has approximately twice the spatial resolution of confocal microscopy.  
212 Spd2-GFP visualised by 3D-SIM imaging forms a ring at the centre of the microtubule  
213 aster, with an inner diameter of about 230-320 nm when viewed in cross section (Suppl.  
214 Fig. 1, insets). Previous studies have demonstrated that Spd2 also forms toroids at the  
215 centrosome in *Drosophila* syncytial embryos, whereby Spd2 projections extend from a  
216 central hollow structure, which presumably contains a single centriole (Conduit et al.,  
217 2015). In addition, in our experiments smaller structures form adjacent to older centrioles  
218 which previously formed de novo, demonstrating the onset of canonical duplication is  
219 concomitant with de novo biogenesis in this system (Suppl. Fig. 1, Insets).

220 In 97% (66/68) of our time-lapse recordings captured by confocal microscopy, we  
221 observed the duplication of the first centriole within 2 to 3 minutes after its de novo  
222 assembly (Fig. 2D, scatter-plot). Finally, we asked whether centrioles are fully converting  
223 to centrosomes, maturing also in their ability to nucleate MTs. Indeed we observed that  
224 as they age, centrioles continue incorporating centrosomal proteins and increase their  
225 MTOC capacity, which is reported by the intensity of the microtubule-associated protein  
226 Jupiter (Fig. 2D, bottom).

### 227 Centriole-mediated regulation of centriole biogenesis

228 Interpretation of earlier experiments led to the model that existing centrioles play a  
229 dominant role in centriole assembly and negatively regulate de novo centriole  
230 biogenesis, and that this inhibitory effect can be accomplished by a single centriole in  
231 the cell (Marshall et al., 2001; La Terra et al., 2005; Uetake et al., 2007; Lambrus et al.,  
232 2015). Whether centrioles can release an inhibitory signal is unknown. On the other  
233 hand, it has been suggested that centrioles can act as catalysers of centriole biogenesis,  
234 by concentrating centriole components and therefore preventing biogenesis elsewhere  
235 (Marshall et al., 2001; Lopes et al., 2015).

236 We asked whether the appearance of the first centriole can prevent further de novo  
237 formation. Surprisingly, despite the assembly of centrioles and their duplication, we  
238 continue to see de novo formation (see timeline in Fig. 2D), challenging the view that  
239 existing centrioles have a context-independent inhibitory effect in centriole biogenesis.  
240 To further test this in more detail, we analysed the spatio-temporal regulation of de novo  
241 biogenesis, at high Plk4 concentration, by assessing if centrioles impact the place and  
242 timing of other de novo events (Fig. 3A, 4A and Suppl. Fig. 2). Once the first centrosome



243 had formed, we assessed if older centrioles affect the biogenesis of others, e.g. by  
244 promoting (triggering effect) or repressing (inhibitory effect) the assembly of new ones.

245 We did not observe a statistical difference in the pairwise inter-event distance  
246 between the first four centrioles formed de novo (Kruskal-Wallis mean rank test) (Fig.  
247 3B, Suppl. Fig. 2). However, we noticed that new centrioles form, on average, more than  
248 10  $\mu\text{m}$  away from previous ones, regardless of centriole rank and droplet size (Fig. 3B,C),  
249 raising the question whether this process is spatially random and if there is any spatial  
250 regulation (e.g. an inhibitory effect) imposed by older centrioles on the birth of  
251 neighbours. To test these hypotheses we generated stochastic models with similar  
252 geometric constraints as the cytosolic explants, allowing us to compare observed and  
253 simulated data. By measuring the inter-event distances between four random events,  
254 independent and uniformly distributed within 3-dimensional spaces of similar geometry,  
255 we can derive that observations in explants do not significantly deviate from the random  
256 simulations (Fig. 3D). According to our measurements, older centrioles have only a short-  
257 range effect on the biogenesis of new centrioles, promoting canonical duplication in very  
258 close proximity, but not determining the place of de novo assembly elsewhere in the  
259 cytosol. Hence, on the scale of tens of micrometers centrioles behave as independent  
260 entities in the initial stages of de novo assembly. Our results strongly suggest that de  
261 novo centriole biogenesis is not affected by the mere presence of other centrioles. It is  
262 possible that biochemical changes at the level of the entire cytoplasm allow for stochastic  
263 de novo centriole formation. To obtain more insight we went on to study the temporal  
264 kinetics of de novo biogenesis.

#### 265 The kinetics of de novo biogenesis

266 We measured the time for the first four de novo centrioles to appear in the explants (Fig.  
267 4A). We detected, on average, a long lag-phase until the birth of the first de novo event,  
268 after which the process seemingly accelerated, presenting rates of de novo centriole  
269 biogenesis in the range of one every two minutes (Fig.s 4B). Assuming independent  
270 events with a constant rate, computer simulations predict that all inter-event times should  
271 follow a similar distribution. As depicted in Fig. 4C, not all of the observed inter-event  
272 distributions were within the confidence interval of the simulation. Moreover, the  
273 difference was more noticeable with higher number of centrioles (Fig. 4C). Maximum  
274 Likelihood Estimation of birth rate indicated a linear increase with centriole number (Fig.  
275 4D). Altogether, our results demonstrate that the de novo centriole formation rate  
276 accelerates in time and may comprise two distinct phases. In an initial lag phase  
277 preceding the formation of the first centriole(s), the probability of centriole assembly is

278 very low. In the subsequent phase, most events seem to occur almost simultaneously.  
279 Such kinetics is reminiscent of a bistable process. Cell-cycle transitions typically show  
280 bistability; they rely on accumulation of a signal or activating enzyme, and the moment a  
281 critical transition occurs the kinetics becomes essentially irreversible and independent of  
282 the signal. This is true for the G2/M transition, which is driven by high Cdk1 activity. Low  
283 Cdk1-Cyclin B activity in interphase can drive S-phase onset and G2 progression,  
284 whereas high Cdk1-Cyclin B activity triggers mitotic entry. The difference between  
285 interphasic and mitotic Cdk activity likely relies on their concentration and  
286 phosphorylation thresholds required to activate substrates and drive the respective cell-  
287 cycle transition (Gutierrez-Escribano and Nurse, 2015; Swaffer et al., 2016; Godfrey et  
288 al., 2017). Here, we observe a burst in centriole biogenesis, after which all centrosomes  
289 are retained in the explants suggesting that the transition underlying their assembly is  
290 irreversible (Tyson and Novak, 2001; Charvin et al., 2009) We thus hypothesise that  
291 multiple foci centriole biogenesis are generated in the cytosol by the action of the bistable  
292 molecular switch arising from the stochastic Plk4 concentration and activity.

### 293 Plk4 concentration modulates the kinetics of centriole assembly

294 Little is known about the regulation of Plk4 activity and the onset of centriole  
295 biogenesis. Full Plk4 activity is accomplished by trans-autophosphorylation of a  
296 conserved T-loop residue within its catalytic domain, which triggers kinase activation  
297 through a positive feedback mechanism (Lopes et al., 2015). Consequently, the  
298 expected kinetics of Plk4 activation may greatly depend on local concentration and on  
299 overcoming a critical threshold (Fig. 5A). As found in other kinases, Plk4 possesses an  
300 autoinhibitory mechanism; once synthesised it is autoinhibited by a cis-interaction  
301 between its L1 linker and activation loop (T-Loop). Autoinhibition is relieved upon Plk4  
302 homodimerisation through its Polo-box (PB) domain 3 and autophosphorylation of  
303 residues within L1 (Klebba et al., 2015a). Moreover, Plk4 binding to the substrate  
304 Stil/Ana2 increases Plk4 phosphorylation within its T-loop (Moyer et al., 2015; Zitouni et  
305 al., 2016). Therefore, Plk4 auto-phosphorylation and interaction with Stil may provide  
306 spatial and temporal regulation of Plk4 kinase activity in cells, activating Plk4  
307 preferentially at the centrosome where it is concentrated. Moreover, Plk4 ability to form  
308 large order oligomers (“condensates”), may be important for the onset of centriole  
309 biogenesis (Montenegro Gouveia et al., 2018; Leda et al., 2018; Shohei and Kitagawa,  
310 2018; Park et al., 2019). We hypothesised that, in the case Plk4-driven centriole  
311 biogenesis is based on a positive feedback mechanism, the initiation of biogenesis is  
312 concentration-dependent and relies on overcoming a critical, local threshold in kinase

313 activity (Fig. 5A). In addition, if the process is bistable, we expect the kinetics to remain  
314 fast once the critical transition has occurred, provided there is enough activator (Plk4) in  
315 the system. To test this, we established a titration assay for Plk4 concentration using egg  
316 cytoplasm. Wildtype eggs have all the components, except for Plk4, presumably at  
317 similar concentrations as Plk4-overexpressing eggs. Thus, mixing egg cytoplasm from  
318 these two genetic backgrounds dilutes only Plk4 within a range of full overexpression  
319 and endogenous levels. We measured the temporal kinetics of de novo centriole  
320 biogenesis for a series of dilutions. We found that all tested Plk4 dilutions – 0.5, 0.33 and  
321 0.16 relative concentration – delay the onset of de novo centriole assembly (Fig. 5B).  
322 The delay is dilution dependent; centrosome formation occurs within all explants at the  
323 highest Plk4 concentration, saturating within 25 min. Saturation is not reached within the  
324 observation time at lower Plk4 concentrations, and the onset of de novo centriole  
325 assembly occurs progressively later with increasingly lower Plk4 concentration (Fig. 5C).  
326 Moreover, stochastic simulations taking into consideration Plk4 trans-auto-  
327 phosphorylation and dephosphorylation, were in agreement with most of the observed  
328 data (Suppl. Fig. 4). Our results suggest the presence of a concentration dependent Plk4  
329 threshold, modulated by the activity of a putative counteracting phosphatase. As a  
330 consequence, the kinetics of Plk4 activity and centriole biogenesis is non-linear as  
331 previously hypothesised in Lopes et al. 2015. Our results also show that the time from  
332 the first to the second biogenesis event does not differ between high overexpression and  
333 dilutions (Fig. 5C, Suppl. Fig. 5), suggesting that Plk4-driven centriole assembly relies  
334 on such a switch-like molecular process. Our experiments provide the first evidence in  
335 vivo that Plk4 triggers de novo centriole biogenesis through a positive feedback  
336 mechanism marked by a critical threshold of Plk4 concentration.

337 Our results lead to the hypothesis that under endogenous conditions, Plk4  
338 concentration in cells is very low and undergoes limited oligomerisation in the cytosol,  
339 which can prevent auto-activation until the sperm centriole enters the egg and locally  
340 concentrates Plk4. However, the concentration and the oligomerisation state of Plk4 in  
341 the cytoplasm have never been studied in *Drosophila*. Therefore, we decided to  
342 investigate these biochemical parameters in the early fly embryo using Fluorescence  
343 Correlation Spectroscopy (FCS).

#### 344 Plk4 regulation under endogenous conditions

345 FCS is a technique with single molecule sensitivity, therefore ideal for quantification  
346 of low abundance proteins present at nanomolar to picomolar concentrations inside the  
347 cell. Previously, this technique has been used to determine the oligomerisation state of

348 another centriolar protein, Sas6, in human U2OS cells (Keller et al., 2014). Moreover,  
349 Plk1, also a member of the Polo-like kinase family, has been studied by FCS in human  
350 RPE1 cells (Mahen et al., 2011). FCS measurements revealed distinct diffusion  
351 coefficients for Plk1 in the cytoplasm, which correlated with its kinase activity during  
352 different cell-cycle stages (Mahen et al., 2011).

353 Therefore, we conducted in vivo FCS to determine Plk4 concentration, diffusion and  
354 oligomerisation in syncytial fly embryos in which Plk4 is at endogenous levels and both  
355 alleles were tagged with a fluorescent reporter by CRISPR (Suppl. Fig. 7 and Suppl.  
356 Movie 3). Despite the very low concentration, we could detect bursts of mNeonGreen–  
357 Plk4 fluorescence above background signal, which was assessed in control flies  
358 expressing only RFP-Tubulin (Suppl. Fig. 9A). More importantly, the mNeonGreen–Plk4  
359 traces generated clear autocorrelation function (ACF) curves, whereas the background  
360 fluorescence measured in RFP–Tubulin expressing embryos did not autocorrelate  
361 (Suppl. Fig. 9B). For mNeonGreen–Plk4, the normalised ACF were best fitted, with  
362 minimal residuals, to a two-component diffusion model, and this fit was corroborated by  
363 the distribution obtained from the Maximum Entropy Method (MEM) fit (Fig. 6A, Suppl.  
364 Table 4). Two fractions of diffusing mNeonGreen–Plk4 were detected in the cytoplasm:  
365 one diffusing at  $17.17 \mu\text{m}^2/\text{s}$  which is similar to the fluorophore mNeonGreen alone  
366 (Suppl. Fig. 8D) and another, slower fraction diffusing at  $1.49 \mu\text{m}^2/\text{s}$  (Fig. 6A, Suppl.  
367 Table 4). While the first fraction probably refers to Plk4 monomers, the second cannot  
368 be explained by homo-oligomerisation alone, suggesting that a fraction of Plk4 may  
369 associate with quasi-immobile substrates in the cytosol.

370 Next, we calculated the total concentration of mNeonGreen–Plk4 in the cytosol and  
371 determined its oligomeric state using the brightness of injected mNeonGreen monomer  
372 as calibration (Suppl. Fig. 8). We confirmed that Plk4 concentration in the cytosol is very  
373 low, around 7.55 nM, and an estimate for diffusion in the cytosol suggests coexistence  
374 of monomeric and oligomeric form (Fig. 6B). More precisely, 30.1% of diffusing Plk4 is  
375 detected as a monomer, while around 69.9% forms low-order oligomers, likely dimers  
376 and at most tetramers (Fig. 6B). Altogether, the FCS results indicate that Plk4 is indeed  
377 a very low abundance protein that undergoes limited oligomerisation within the  
378 cytoplasm, in early-developing *Drosophila* embryos. Thus, the nanomolar concentration  
379 of Plk4 may be insufficient to trigger de novo centriole assembly.

380 The change in the kinetics of de novo centriole assembly in response to Plk4  
381 concentration allied to the current body of knowledge in the centrosome field, collectively  
382 suggest that centriole formation is critically regulated by timely concentration of

383 centrosomal molecules in one single place (Rale et al., 2018; Takao et al., 2019). But  
384 what initiates the concentration of these centrosomal molecules? Recent studies suggest  
385 that the PCM may play an important role.

#### 386 PCM components promote the early steps of centriole de novo assembly

387 In *D. melanogaster* cultured cells, co-depletion of the centriolar protein Ana2 and the  
388 PCM component D-Pericentrin-like protein (D-Plp) additively impair centriole  
389 biogenesis, indicating that two alternative pathways – a centriolar and a PCM-mediated  
390 – may be at play (Ito et al., 2019). Moreover, in mouse ependymal cells without centrioles  
391 and specialised electron-dense deuterosomes that can feed centriole assembly, a  
392 correct number of centrioles can form de novo within Pericentrin rich areas (Mercey et  
393 al., 2019b). To test the role of the PCM in de novo centriole assembly, we started by  
394 performing perturbation experiments in *Drosophila* DMEL cultured cells, since it is easier  
395 to knock down several genes in vitro than in the organism. To create an assay for de  
396 novo centriole assembly, we depleted centrioles through successive cell divisions in the  
397 presence of RNAi against Plk4. As cells proliferate in the absence of centriole  
398 duplication, centriole number is progressively reduced. This is followed by a recovery  
399 period, without RNAi against Plk4, where Plk4 translation is resumed and centrioles  
400 assemble de novo (Rodrigues-Martins et al., 2007).

401 After RNAi against Plk4, we further depleted PCM components, while allowing Plk4  
402 translation to recover (Fig. 7A), which is sufficient to drive centriole de novo assembly in  
403 the mCherry (mCh)-treated control cells (Fig. 7B,C, and Suppl. Fig. 10). After 10 days,  
404 only 3% of the cells treated with RNAi against Plk4 had centrioles, whereas in the  
405 mCherry-treated control about 85% of the cells had at least one centriole, as expected  
406 (Rodrigues-Martins et al., 2007). Cells depleted of centrioles were then treated for four  
407 days with RNAi against PCM components including: Cnn + Asl + D-Plp + Spd2 together  
408 (referred to as “All PCM”), previously shown to be essential for PCM maintenance  
409 (Pimenta-Marques et al., 2016), and the downstream PCM protein,  $\gamma$ -tubulin, which is  
410 known to be important for MT nucleation across species and contribute for centriole  
411 duplication in *C. elegans* embryos and human cells (Dammermann et al., 2004; Kleylein-  
412 Sohn et al., 2007). While cells treated with control mCherry dsRNA recovered centriole  
413 number within 4 days after ceasing Plk4 dsRNA treatment (indicating that centrioles  
414 formed de novo), only 15-20% of the cells treated with dsRNA against “All PCM” had  
415 centrioles (Fig. 7C). Moreover, de novo centriole formation was impaired by  $\gamma$ -tubulin  
416 23C depletion, whereby only 34–42% of Plk4 depleted cells recovered a normal centriole  
417 number (Fig. 7C, Suppl. Fig. 10). This result implies that Gamma-tubulin, a critical PCM

418 component necessary for microtubule nucleation at the centrosome, is important for de  
419 novo centriole biogenesis. We proceeded to validate this observation in vivo and  
420 generated fly lines expressing shRNA against Gamma-tubulin 23C and Gamma-tubulin  
421 37C (a maternally expressed gene, mostly abundant in early fly development (Tavosanis  
422 et al., 1997), under control of the UASp/Gal4 system. Fertilised eggs laid by females  
423 overexpressing the shRNA targeting Gamma-tubulin 37C do not develop (Suppl. Table  
424 7) and unfertilised eggs display spindle defects similar to those previously shown in  
425 oocytes from Gamma-tubulin 37C mutant females (yellow asterisks in Fig. 7D and in  
426 Suppl. Fig. 11) (Tavosanis et al., 1997), indicating this RNAi construct is likely functional.  
427 We collected unfertilised eggs expressing RNAi targeting Gamma-tubulin 23C and/or  
428 37C, while simultaneously overexpressing Plk4, under control of the V32-Gal4 driver. In  
429 the control, centrioles form de novo in 73% (22/30) of the eggs overexpressing Plk4  
430 alone (Fig. 7D,E and Suppl. Fig. 11). On the other hand, in the case of recombinant  
431 Gamma-tubulin 23C + 37C RNAi flies overexpressing Plk4, only 26% (14/54) of their  
432 eggs show centrioles, while individual Gamma-tubulin knock-downs display intermediate  
433 phenotypes (Fig. 7D,E and Suppl. Fig. 11). Therefore, Gamma-tubulin depletion seems  
434 to impair de novo centriole assembly in vivo too.

435

## 436 Discussion

437 De novo centriole assembly is widely documented across the eukaryotic tree of life.  
438 Numerous studies report its incidence and even its relationship with life-history traits in  
439 particular groups (Mizukami and Gall, 1966; Aldrich, 1967; Grimes, 1973a; b; Mir et al.,  
440 1984; Renzaglia and Garbary, 2001; Idei et al., 2013), but they have not addressed how  
441 de novo assembly is regulated in living cells and what the contribution of older centrioles  
442 to this process is. With the workflow here implemented, we demonstrate that cytosolic  
443 explants from post-meiotic *D. melanogaster* eggs overexpressing Plk4 are competent of  
444 centriole biogenesis, offering the opportunity to investigate centriole formation at high  
445 spatio-temporal resolution by confocal fluorescence microscopy (Fig. 1). In these  
446 explants, Plk4 triggers stochastic formation of multiple, stable centrioles. Our assay  
447 allowed us to study several important open questions regarding the regulation of de novo  
448 centriole biogenesis.

449 **How is the timing of biogenesis regulated?** Our current knowledge supports the  
450 need for extrinsic timely cues, provided by the cell cycle regulation, to control the  
451 centriole cycle (Wang et al., 2011; Izquierdo et al., 2014; Fu et al., 2016; Tsuchiya et al.,  
452 2016). However, here we observed that de novo formed centrioles can undergo time-

453 dependent centriole-to-centrosome conversion and maturation, incorporating Ana1, Asl,  
454 Spd2 and Plk4. Consequently, approximately 2–3 minutes after being born, centrioles  
455 nucleate more microtubules and can duplicate (Fig. 2, insets, Suppl. Fig. 1, insets). Given  
456 that unfertilised eggs are not progressing through the cell cycle (Horner et al., 2006;  
457 Vardy and Orr-Weaver, 2007; Deneke et al., 2019), our findings suggest that centriole  
458 de novo formation, maturation and duplication can occur even without cell cycle  
459 transitions, in particular without having to undergo mitosis. Surprisingly, we also  
460 observed that the duplication time is similar for the first centrosomes assembled de novo  
461 at high (undiluted) and lower (diluted) concentration of Plk4 (Suppl. Fig. 6). This indicates  
462 that, despite the absence of a typical cell-cycle “clock”, canonical biogenesis is both  
463 spatially and temporally robust. Hence, we propose that distinct intrinsic “clocks” regulate  
464 de novo and canonical biogenesis, with de novo biogenesis being more sensitive to Plk4  
465 concentration.

466 Our data suggests that a switch-like transition mediated by Plk4 activity occurs in the  
467 cytoplasm. Evidence for such molecular mechanism is supported by the change in the  
468 kinetics of de novo centriole biogenesis following the delay in assembly of the first de  
469 novo event, modulated by concentration of Plk4 (Fig. 4D, 5C and Suppl. Fig. 4).  
470 Theoretical modelling and simulations indicate that the rate of de novo centriole  
471 assembly accelerates with time, following the rise in Plk4 activity (Suppl. Fig. 6). The  
472 sensitivity to the dilutions of Plk4 expression agrees with the non-linear kinetics of Plk4  
473 trans-autoactivation in the cytosol by Lopes et al. 2015, suggesting that the burst in  
474 biogenesis occurs once a critical activity threshold is overcome (also proposed by  
475 Lambrus et al. 2015 for the regulation of canonical duplication). Moreover, Plk4 may  
476 need to oligomerise to promote centriole assembly. Consistent with this we observe,  
477 oligomeric forms of Plk4 in the cytoplasm at extremely low concentrations of Plk4 (Fig.  
478 6).

479 Centrosomal proteins are highly enriched in intrinsically disordered regions, coiled-  
480 coil domains and phosphorylation sites, which are critical for protein interactions and  
481 oligomerisation, therefore promoting assembly of protein scaffolds (Santos et al., 2013;  
482 Kuhn et al., 2014). For example, Sas6 self-assembly into homodimers is at the heart of  
483 the universal 9-fold symmetry (Nakazawa et al., 2007; Breugel et al., 2011; Kitagawa et  
484 al., 2011; Guichard et al., 2017). At high concentration, *Xenopus* Plk4 forms  
485 supramolecular scaffolds that bind other centrosomal proteins and nucleate MTs  
486 (Montenegro Gouveia et al., 2018). In human cells, the association of Plk4 into  
487 condensates was shown to be mediated by disordered regions within Plk4 (Yamamoto

488 and Kitagawa, 2019) and regulated by autophosphorylation (Montenegro Gouveia et al.,  
489 2018; Yamamoto and Kitagawa, 2019; Park et al., 2019).

490 In switch-like processes, critical thresholds exist that, whenever crossed, result in an  
491 irreversible transition. We suspect that the concentration of active Plk4 increases over  
492 time at multiple sites in the cytosol, overcoming the activity of counteracting factors and  
493 driving centriole biogenesis almost simultaneously in independent locations in the  
494 explants. We have demonstrated a concentration-dependent delay in the onset of de  
495 novo centriole biogenesis upon Plk4 dilution in wild-type extract (Fig. 5B), while the inter-  
496 event time is much less affected by the cytoplasmic dilutions (Fig. 5C, Suppl. Fig. 5) and  
497 the spatial dynamics still fall within random predictions at lower Plk4 overexpression  
498 (Suppl. Fig. 3). Our dilution experiments suggest that time-dependent localised  
499 concentration of Plk4 and, perhaps, association into higher-order structures drives de  
500 novo centriole biogenesis at multiple locations in the cytoplasm. Once a critical threshold  
501 in molecular concentration is locally crossed, Plk4-driven centriole assembly is  
502 irreversibly catalysed.

503 **Which factors can help to locally increase the concentration of centriole**  
504 **components?** Besides local Plk4 concentration, other factors may play a role in  
505 regulating the location of de novo centriole assembly. For instance, MTs likely participate  
506 to the localisation of some components at the centrosome through molecular motor  
507 based transport. Furthermore, the PCM was shown to be important for canonical  
508 centriole biogenesis (Dammermann et al., 2004; Pelletier et al., 2004; Kemp et al., 2004;  
509 Delattre et al., 2006; Kleylein-Sohn et al., 2007) and recent studies in multiciliated cells  
510 propose that, in the absence of centrioles or specialised deuterosomes, centrioles can  
511 form within PCM clouds (Mercey et al., 2019b). De novo centriole biogenesis has been  
512 described to occur within Pericentrin and Gamma-tubulin-rich foci in vertebrate somatic  
513 cells (Khodjakov et al., 2002). We have also hypothesised that, in our system, the early  
514 steps of de novo centriole assembly occur within a MT and PCM-rich environment. In  
515 agreement, our PCM perturbation experiments support an important role for the PCM, in  
516 particular its downstream component Gamma-tubulin, in de novo centriole assembly  
517 (Fig. 7, Suppl. Fig.s 10 and 11). The PCM may generate protein scaffolds in the  
518 cytoplasm where centriolar proteins bind with higher affinity, therefore locally  
519 concentrating these molecules and forming stable seeds for centriole biogenesis.  
520 Moreover, Gamma-tubulin promotes MT nucleation, which may attract more components  
521 via motor-based transport or through entrapment of proteins with MT-binding capacity,  
522 such as Plk4 (Montenegro Gouveia et al., 2018). These manifold properties of the PCM  
523 may promote centriole biogenesis within biochemically-confined environments in the  
524 cytoplasm.



525       **Do centrioles influence the de novo assembly of others?** Previous studies had  
526 suggested that once centrioles form de novo in cells without centrioles, any other events  
527 of biogenesis would be “templated”, i.e., follow the canonical pathway (Marshall et al.,  
528 2001; La Terra et al., 2005; Uetake et al., 2007; Lambrus et al., 2015). This appears to  
529 be the case in *Naegleria gruberi*, where the first basal body assembles de novo but the  
530 second duplicates from the first (Fritz-Laylin et al., 2016), in acentriolar somatic human  
531 cells (La Terra et al., 2005; Uetake et al., 2007; Lambrus et al., 2015) and in green algae  
532 (Marshall et al., 2001). Together, these studies suggest that centrioles negatively  
533 regulate the de novo pathway and play a dominant role in biogenesis by recruiting the  
534 centrosomal components that limit biogenesis. In fly egg explants, we observed that  
535 centrioles continue to form de novo long after the first centriole has assembled and  
536 duplicated (Fig. 2). Both pathways – de novo formation and canonical duplication – co-  
537 occur within the same cytoplasmic compartment, indicating that “older” centrioles and  
538 their duplication do not prevent biochemically de novo centriole assembly, even at lower  
539 Plk4 overexpression (Fig. 5 and Suppl. Fig. 5). Thus, it appears that these pathways are  
540 not inherently mutually inhibitory in the fly germline.

541       We then wondered whether centriole assembly has a negative impact on the birth of  
542 other centrioles, for instance by changing the molecular composition of the cytoplasm.  
543 Addressing this problem required comparing our observations with random simulations  
544 results obtained under similar spatial geometries. This comparison strongly indicates that  
545 the first de novo events are spatially independent, suggesting that recently formed  
546 centrioles have only a very short-range effect, if any, on the biogenesis of new centrioles.  
547 They promote duplication at the centrosome but do not impact the place where new  
548 centrioles assemble de novo elsewhere in the cytosol (Fig. 3D and Suppl. Fig. 3). We  
549 cannot exclude the possibility that shortly after forming, centrioles are still immature and  
550 therefore incapable of inhibiting de novo biogenesis. However, this hypothesis seems  
551 unlikely given their ability to duplicate. Another explanation may be that the overall  
552 concentration of Plk4 in our system is so high that over-rides any possible spatial  
553 regulation, but our modelling suggests that the location of de novo centriole biogenesis  
554 remains random even at lower overall Plk4 concentration (“0.16”, Suppl. Fig. 4). Our  
555 results provide further support that spatio-temporal (local) concentration of Plk4 must be  
556 well-regulated in cells to form an exact number of centrioles, since their presence is not  
557 necessarily enough to ensure centrioles can only form in the vicinity of existing ones.

558       **How do our results fit with what naturally occurs in vivo and in nature?** A  
559 previous study had estimated 1200–5000 Plk4 molecules per cell in asynchronous  
560 human cells, from which around 70 molecules are loaded at the centrosome (Bauer et

561 al., 2016). We generated flies labelled with mNeonGreen at Plk4 genomic loci by  
562 CRISPR (Suppl. Fig. 7) and confirmed that endogenous diffusing pool of Plk4 is present  
563 at very low concentration and undergoes limited self-association in the cytosol in early  
564 fly embryos (Fig. 6B). These properties of Plk4 in the cytosol are unfavourable for  
565 centriole de novo assembly, ensuring that centrioles form in the right place by canonical  
566 biogenesis. Our measurements help building a quantitative framework for the transition  
567 of Plk4 molecules from the cytoplasm to the centriolar compartment, which ultimately  
568 controls centriole biogenesis.

569 Finally, we wonder to what extent our findings in *D. melanogaster* relate to the  
570 naturally occurring parthenogenetic development in other organisms, including some  
571 species of wasps, flies and aphids (Riparbelli et al., 1998; Tram and Sullivan, 2000;  
572 Riparbelli and Callaini, 2003; Riparbelli et al., 2005; Ferree et al., 2006). In those cases,  
573 multiple functional centrosomes form spontaneously in the egg during meiosis, two of  
574 which assemble the first mitotic spindle and trigger normal development. In the case of  
575 *D. mercatorum*, the centrosomes that assemble *de novo* can also duplicate and they do  
576 so in a cell-cycle dependent manner (Riparbelli and Callaini, 2003). It would be relevant  
577 to determine if the burst in centrosome assembly coincides with an increase in global  
578 Plk4 concentration or activation in the egg of these species. Just like in our system, a  
579 highly variable number of MTOCs are assembled, suggesting the presence of a weak  
580 control mechanisms against de novo centriole formation in the germline, once the eggs  
581 enter meiosis. Further studies aimed at documenting centrosome birth dynamics and  
582 their maturation in these natural systems may find more about the principles that govern  
583 de novo centriole formation and their conservation throughout species evolution.

584 In oocytes from some parthenogenetic hymenoptera, maternal centrosomes form de  
585 novo close to cytoplasmic organelles highly enriched in Gamma-tubulin called accessory  
586 nuclei (Ferree et al., 2006). Moreover, centrosome ablation in vertebrate CHO cells is  
587 followed by accumulation of Gamma-tubulin and Pericentrin in nuclear-envelope  
588 invaginations, hours before bona-fide centrioles are detected (Khodjakov et al., 2002).  
589 Interestingly, if treated with nocodazole, acentriolar CHO cells are no longer capable of  
590 assembling centrioles de novo (Khodjakov et al., 2002). Therefore, our work besides  
591 substantiating previous studies, further suggests that the organisation of PCM-rich foci  
592 likely represent the first steps and are essential for de novo centriole assembly.

593 Despite a profound knowledge in the field concerning localisation and interaction  
594 of centrosomal molecules, and how these interactions change during the cell cycle, there  
595 is still a vast array of processes to uncover regarding the regulation of centriole  
596 assembly. For example, it remains important to investigate scaffold formation in vivo and  
597 how thresholds in activity of molecules affect formation, as these thresholds might also

598 regulate canonical centriole duplication and perhaps other critical transitions in organelle  
599 assembly. It is yet unclear how PCM and MTs contribute to the early onset of centriole  
600 formation. Understanding how these – activity threshold and sensitivity to them, as well  
601 as PCM and MT-rich micro-environments – go awry may allow uncovering one putative  
602 mechanism by which centriole number deregulation arises in human diseases, since an  
603 increase in number of PCM-rich foci possibly promotes assembly of supernumerary  
604 centrioles.

605

606

## 607 **Materials and Methods**

### 608 **Fly work and sample preparation**

#### 609 *D. melanogaster* stocks and husbandry

610 All *D. melanogaster* stocks used in this study are listed in [Suppl. Table 1](#). Transgenic  
611 mNeonGreen-Plk4 flies were generated in-house by CRISPR/Cas9-mediated gene  
612 editing (Port et al., 2014). Twenty base-pairs guide RNAs (gRNA) targeting the N-  
613 terminal region of Plk4, with 5' BbsI-compatible overhangs, were ordered as single-  
614 stranded oligonucleotides (Sigma-Aldrich). The complementary oligonucleotides were  
615 annealed, phosphorylated and cloned into BbsI-digested pCFD3-dU6:3gRNA  
616 expression plasmid (from Simon Bullock, MRC, Cambridge, UK). A plasmid DNA was  
617 designed for homologous recombination-mediated integration of mNeonGreen between  
618 the 5'UTR and the first coding exon of Plk4. 1-kbp long 5' and 3' homology arms were  
619 PCR-amplified from genomic DNA isolated from y1,M{nanos-Cas9.P}ZH-2A,w\* flies  
620 ([Suppl. Table 2](#)) (BDSC# 54591). The mNeonGreen coding sequence was PCR  
621 amplified from plasmids ([Suppl. Table 2](#)). All fragments were sub-cloned into the pUC19  
622 plasmid (Stratagene) using restriction enzymes: 5' Homology Arm - NdeI and EcoRI;  
623 Fluorescent tag + linker - EcoRI and KpnI; 3' Homology Arm KpnI and XbaI. Synonymous  
624 mutations were performed on the homology arms, removing the protospacer-adjacent  
625 motif (PAM) sequence from the donor plasmid to prevent re-targeting. The final donor  
626 template for homologous recombination-mediated integration was composed of a  
627 fluorescent reporter and a short flexible linker (see sequence in [Suppl. Table 2](#)), flanked  
628 by 1-kbp homology arms. Two circular plasmids – pCFD3-Plk4\_gRNA and mNeonGreen  
629 template – were co-injected into nos-Cas9 embryos (BDSC# 54591 (Port et al., 2014)).  
630 Injected flies (F<sub>0</sub>) were crossed to a balancer strain and single-fly crosses were  
631 established from their offspring (F<sub>1</sub>). The resulting F<sub>2</sub> generation was screened for

632 positive integrations by PCR, using primers dmPLK4 5UTR 3 FW and dmPLK4 1exon  
633 Rev ([Suppl. Table 3](#)). Homozygous mNeonGreen-Plk4 and pUb-RFP- $\beta$ 2-Tubulin flies  
634 (gift from Yoshihiro Inoue, (Kitazawa et al., 2014)) were crossed, establishing a stable  
635 stock.

636 We also generated flies expressing short hairpin RNAs (shRNA) against gamma-  
637 tubulin 37C and 23C under the UASp promoter and crossed them with the V32-Gal4 ( $w^*$ ;  
638 P{maternal- $\alpha$ tubulin4-GAL::VP16}V2H, kindly provided by Daniel St Johnston), at 25°C,  
639 to knock-down both genes in the female germline. To generate gamma-tubulin 37C and  
640 23C constructs, sense and antisense oligos for each target gene were annealed and  
641 cloned into pWALIUM22, using NheI and EcoRI restriction enzyme sites ([Suppl. Table](#)  
642 [6](#)). Each construct was inserted into different landing sites on the third chromosome by  
643 PhiC31 integrase-mediated recombination ([Suppl. Table 6](#)). Germline-specific Plk4  
644 overexpression was accomplished by crossing flies carrying the pUASp-Plk4 construct  
645 (Rodrigues-Martins 2007) and the V32-Gal4, at 25°C.

646 Centrosomes were visualised using the following centrosomal reporters: i) pUb-  
647 Spd2-GFP (homemade construct, injected at BestGene Inc.); ii) Ana1-tdTomato (gift  
648 from Tomer Avidor-Reiss, (Blachon et al., 2008); iii) pUASp-GFP-Plk4 (homemade  
649 construct, injected at BestGene Inc.); iv) Asl-mCherry (gift from Jordan Raff, (Conduit et  
650 al., 2015)), in combination with either endogenous Jupiter-GFP (BDSC# 6836) or  
651 endogenous Jupiter-mCherry (gift from Daniel St Johnston, (Lowe et al., 2014)), as  
652 reporters for centrosomal microtubule nucleation.

653 Flies were maintained at 25°C in vials supplemented with 20 mL of culture medium  
654 (8% molasses, 2.2% beet syrup, 8% cornmeal, 1.8% yeast, 1% soy flour, 0.8% agar,  
655 0.8% propionic acid, and 0.08% nipagin).

#### 656 Testing UASp-RNAi lines for developmental lethality

657 To test for lethality effects of  $\gamma$ -tubulin 37C and  $\gamma$ -tubulin 23C shRNAs alone and  
658 recombined, each line was crossed to V32-Gal4 flies. Female progeny carrying the Gal4  
659 and shRNA was crossed to  $w^{1118}$  males (10 females x 5 males per vial, 4 independent  
660 crosses) and the number of pupae in each vial was counted 9-10 days after each transfer  
661 (3 technical repeats were performed). See results in [Suppl. Table 7](#).

#### 662 Embryo/Egg collections

663 For embryo collections, 3–4 days old female and male flies were transferred to a cage  
664 coupled to a small apple juice agar plate (25% apple juice, 2% sucrose, 1.95% agar and  
665 0.1% nipagin), supplemented with fresh yeast paste. Embryos were collected for 1h and  
666 aged for half-an-hour. For unfertilised egg collections, around a hundred 5-7 days old  
667 virgin females were placed in the cage and 20 minutes collections were performed. All  
668 cages were maintained at 25°C, under 50–60% humidity. The embryos or eggs were  
669 dechorionated in 7% Sodium Hypochlorite solution (VWR), washed thoroughly in milliQ  
670 water, aligned and immobilised on clean, PLL-functionalised coverslips, using a thin layer  
671 of heptane glue. Samples were covered with Voltalef grade H10S oil (Arkema).

#### 672 Preparation of micropipettes and functionalised coverslips

673 High Precision 22x22 glass coverslips No 1.5 (Marienfeld) were cleaned for 10 min  
674 in 3M Sodium Hydroxide, followed by 4 dip-and-drain washes in milliQ water. Next, they  
675 were sonicated for 15 min in “Piranha” solution ( $H_2SO_4$  and  $H_2O_2$  (30% concentrated)  
676 mixed at 3:2 ratio), followed by two washes in MilliQ water, once in 96% ethanol and  
677 twice again in milliQ water for 5 min each. Coverslips were spin-dried and subsequently  
678 treated for 20 minutes with Poly-L-Lysine (PLL) solution 0.01 % (Sigma-Aldrich), followed  
679 by multiple dip-drain-washes in MilliQ water. The coverslips were spin-dried and stored  
680 in a clean and dry rack.

681 Glass capillaries (0.75mm inner diameter, 1 mm outer diameter; Sutter Instrument)  
682 were forged into glass needles by pulling them on a vertical pipette puller (Narishige PC-  
683 10), using a one-step pulling protocol, at about 55% heating power. Using a sharp  
684 scalpel, the tip of the capillary was cut, generating micropipettes with 30-35  $\mu m$  diameter  
685 pointed aperture (Telley et al., 2013).

#### 686 Single egg extract preparation

687 Cytoplasmic extraction from individual unfertilised eggs and explant deposition onto  
688 the surface of PLL-coated coverslips was performed on a custom-made  
689 micromanipulation setup coupled to an inverted confocal microscope, as previously  
690 described in (Telley et al., 2013) and (de-Carvalho et al., 2018). The size of the explants  
691 was manually controlled in order to produce droplets measuring between 40 - 80  $\mu m$  in  
692 diameter and approximately 10  $\mu m$  in height, allowing fast time-lapse imaging of the  
693 entire explant volume.

#### 694 Egg immunostaining and imaging

695 Unfertilised eggs overexpressing Plk4 and knocked down for  $\gamma$ -tubulin were collected  
696 from 5–7 days old virgin females for 2h at 25°C, and aged at 25°C for 4 hours. Protocol  
697 was conducted according to (Riparbelli and Callaini, 2005). Briefly, aged eggs were  
698 rinsed in MilliQ water + 0.1% Tween, dechorionated in 7% Sodium Hypochlorite solution  
699 (VWR) and washed extensively with MilliQ water. Using a metal grid, dechorionated eggs  
700 were transferred into a scintillation flask containing 50% ice-cold Methanol + 50%  
701 Heptane. The vitelline membrane was removed by vigorously shaking the eggs for 3 min.  
702 Devitellinised eggs sunk to the bottom of the lower Methanol phase and were then  
703 collected into a 1.5 ml eppendorf and fixed for 10 minutes in Methanol at -20°C. Following  
704 fixation, the eggs were rehydrated in Methanol:PBS series (70:30%, 50:50% and  
705 30:70%) for 5 min each, washed twice in PBS for 10 min and incubated for 1 hour in D-  
706 PBSTB (1x Dulbecco's PBS, with 0.1% Triton X-100 and 1% BSA), at RT. Primary  
707 antibody incubations were performed overnight at 4°C, with the following antibodies:  
708 rabbit anti-Bld10 (dilution 1:500; gift from Tim Megraw, The Florida State University,  
709 USA); rat anti-tubulin YL1/2 (dilution 1:50; Biorad) and guinea-pig anti-Ana1 (dilution  
710 1:500; kindly provided by Jordan Raff), diluted in D-PBSTB. Eggs were washed  
711 extensively in D-PBSTB and incubated with secondary antibodies for 2h at RT - donkey  
712 anti-rabbit Alexa 555 (dilution 1:1000; Molecular Probes), goat anti-rat Alexa 488 (dilution  
713 1:1000; Jackson Immunoresearch Laboratories) and donkey anti-guinea pig Alexa 647  
714 (dilution 1:1000; Jackson Immunoresearch Laboratories) in D-PBSTB. Eggs were  
715 washed twice in PSB with 0.1% Triton X-100, twice in PBS and mounted onto coverslips  
716 in Vectashield mounting media (Vector Laboratories).

717 Imaging was conducted on a Nikon Eclipse Ti-E microscope equipped with a  
718 Yokogawa CSU-X1 Spinning Disk confocal scanner and a piezoelectric stage (Physik  
719 Instrumente) with 220  $\mu$ m travel range. 0.3  $\mu$ m optical sections were recorded with a  
720 EMCCD Photometrics 512 camera using a Plan Fluor 40x 1.30 NA oil immersion  
721 objective, controlled with Metamorph 7.5 software. 491 nm, 561 nm and 640 nm laser  
722 lines were used to excite the secondary antibodies. Egg counts were tested with a Chi-  
723 square test against the null-hypothesis that the outcome is random. Then, each test  
724 condition was compared to the control condition with a 2-proportions Z-test under H0  
725 that the proportions of eggs with centrioles are equal versus HA that the proportion in  
726 the test is smaller. The significance level for multiple testing was Bonferroni corrected.  
727 Significance level was  $p=0.01$ .

728

729 **Image acquisition, processing and analysis**

### 730 Time-lapse explant imaging on the spinning disk confocal microscope

731 Centriole formation was followed by time-lapse imaging in droplets initially devoid of  
732 centrosomes. Explants were imaged at room temperature using a Plan Apo VC 60x 1.2  
733 NA water objective. 0.45  $\mu\text{m}$  thick optical sections were acquired with an EMCCD Andor  
734 iXon3 888 camera using a Yokogawa CSU-W1 Spinning Disk confocal scanner equipped  
735 with a piezoelectric stage (737.2SL, Physik Instrumente), installed on a Nikon Eclipse Ti-  
736 E microscope. Unless stated differently, dual-colour (488 nm and 561 nm excitation laser  
737 lines), 15 seconds time-lapses of the explant volume were recorded with Andor IQ3  
738 software.

### 739 Image processing

740 Multi-stack, time-lapse calibrated images were deconvolved with Huygens (Scientific  
741 Volume Imaging, The Netherlands) using a Point Spread Function (PSF) automatically  
742 calculated from the data set and run in batch mode, for each channel separately. 32-bit  
743 deconvolved images were converted to 16-bit and processed using Fiji (NIH (Schindelin  
744 et al., 2012)). Selected stills from the time-lapse acquisitions were processed with  
745 Photoshop CS6 (Adobe). Graphic representations were performed using using  
746 GraphPad Prism software (Version 5.0) and the final figures were assembled in Illustrator  
747 CS6 (Adobe).

### 748 Centrosome tracking

749 Centrosomes were tracked using the Fiji Plug-in TrackMate v3.5.1 (Jaqaman et al.,  
750 2008). Centrosomes were identified by the Spd2–GFP localisation at the centre of mass  
751 of the microtubule aster. Relying on this criteria, we performed the TrackMate analysis  
752 sequentially, starting with the Jupiter-mCherry channel. First, we applied a *3D Gaussian*  
753 *Blur* filter to the images (sigma = 0.7 pixels), facilitating the particle detection on  
754 TrackMate using the Laplacian of Gaussian algorithm. The microtubule asters were  
755 automatically detected inside spheres of approximately 0.7  $\mu\text{m}$  in radius, adjusting the  
756 threshold value for each time-lapse video independently. Next, the first four de novo  
757 formed asters were manually tracked from the list of detected particles. A corrected  
758 XYZT coordinate matrix of the first de novo events was saved for each video and  
759 imported to MatLab R2016b (The MathWorks, Inc.). MatLab was used to build a 3D  
760 binary mask with spheres of radius  $r$  (where  $r \geq$  microtubule aster size), centred at the  
761 detected coordinate points. This allowed bypassing incorrect particle detection caused  
762 by the large number of green auto-fluorescent yolk particles of intermediate signal

763 intensity, therefore excluding them from the analysis early on. The resulting 3D masks  
764 were concatenated into 4D hyperstacks, using the *Bio-Formats importer* plugin in FIJI.  
765 The Spd2–GFP images were multiplied by the corresponding 4D binary masks, resulting  
766 in a 4D image retaining the pixel intensity values solely within the Jupiter-mCherry ROIs.  
767 Next, we used *TrackMate* to detect centrioles within spheres of 0.3  $\mu\text{m}$  radius, combining  
768 sub-pixel localisation and a *Median* filter. After detection, the particles were manually  
769 tracked. The final centrosome tracks were exported as an Excel MS spreadsheet.

## 770 Statistics and mathematical modelling

771 Centrosome tracking data was imported in R version 3.4.1 for further analysis and  
772 modelling. The data was analysed in two ways: one aiming at identifying possible spatial  
773 constraints in the positioning of the centrioles relative to each other within the droplet at  
774 the time a centrosome is formed (neglecting time), while the other aimed at  
775 understanding temporal constraints (neglecting space). The data was analysed  
776 statistically, and simulations were performed in an effort to understand the underlying  
777 principles. The details regarding sample size, statistical tests and descriptive statistics  
778 are indicated in the respective figure legends and in the main text.

779 The experimental data was compared to simulated data by calculating the empirical  
780 cumulative distributions of each dataset (one experimental and 100 simulated – each  
781 consisting of 68 droplets) using the function *ecdf* from the *stats* package; and overlapping  
782 the median and 95% confidence interval (from the quantiles 0.025 to 0.975) of the  
783 simulated datasets' cumulative distributions with the corresponding empirical distribution  
784 from the experimental dataset. Random numbers were generated using the function *runif*  
785 from the *stats* library.

786 For the spatial analysis, each time a new centriole appeared, the 3D pairwise  
787 distances between centrioles was calculated and labelled according to appearance  
788 relative to prior centrosomes in the droplet. This allowed keeping track of event order  
789 and, if any spatial effect of existing centrosomes on the appearance of a new centrosome  
790 was present, we would be able to detect a difference in their pairwise distances. To test  
791 this, the function *kruskal.test* of the *stats* library was used to perform the Kruskal-Wallis  
792 rank sum test on the pair-wise distances and labels. To complement this analysis, we  
793 decided to compare the distributions of pairwise distances with those expected by a  
794 spatially null model whereby centrosomes appear randomly across the available space  
795 in the droplet. To simulate this null model, sets of random points were simulated in  
796 sections of semi-spheres of similar geometry as each of the experimental droplets,



797 characterised by height  $h$  and diameter  $d$ . To this effect, a height  $z$  was generated which  
798 satisfied  $q_1 = \frac{z(d^2(6h-3z) + 4hz(3hz(2z)))}{3d^2h^2 + 4h^4}$  – where  $q_1$  was a random number between 0 and  
799 1 – by applying the *optim* function from the *stats* library with the “Brent” method, starting  
800 with  $z = 0$ . This ensured that the  $z$  coordinate was selected proportionally to the area of  
801 the circle it specifies. The two extremes,  $z = 0$  and  $z = 1$ , correspond to the lowest and  
802 highest point of the droplet, respectively. Subsequently, the coordinates  $x$  and  $y$  were  
803 generated, within the respective circle at height  $z$ , by generating a random angle  $\theta$   
804 between 0 and  $2\pi$ , and a random number  $q_2$  between 0 and 1, resulting in  $x = r \cos(\theta)$   
805 and  $y = r \sin(\theta)$ , where  $r = a\sqrt{q_2}$ ,  $a = 2\sqrt{(h-z)(2R-(h-z))}$  and  $R = \frac{d^2+4h^2}{8h}$ . The  
806 pairwise distances between simulated points were calculated in the same way as for the  
807 experimental data, and the respective empirical cumulative distributions were computed  
808 and compared to the experimental empirical distribution, as described above.

809 For the temporal analysis, the waiting times between centrosome births were  
810 calculated from the data and labelled according to which centrosome had just formed.  
811 Accounting for a possible change of centrosome birth rate as a function of the number  
812 of existing centrosomes, centrosome birth rates were estimated from each of the  
813 observed distributions of waiting times by Maximum Likelihood using the *fitdistr* function  
814 from the *MASS* library. The experimental data was then compared with a temporal null  
815 model whereby centrosomes form at a constant rate in time, irrespective of the existence  
816 of other centrosomes and of the volume of the droplet. To this effect, random samples  
817 of Poisson distributed waiting times were generated using the *rexp* function of the *stats*  
818 library, using the rate estimated from the waiting times between the appearance of the  
819 first and second centrosomes. The empirical cumulative distributions of these waiting  
820 times were compared to those from experimental data, as described above.

821 The trans-autophosphorylation of Plk4 was modelled following Lopes et al., 2015.  
822 Briefly, it is assumed that Plk4 protein is produced with constant source rate  $s$  in basal  
823 activity form B. The phosphorylation of this B form in the T-loop results in a form  $A_1$  with  
824 higher catalytic activity. The phosphorylation of the  $A_1$  form the degron converts it to a  
825  $A_2$  that is targeted for proteasome increasing its degradation rate but that keeps the same  
826 catalytic activity. The phosphorylation at the T-loop is catalysed by either low activity B  
827 form or the high activities  $A_1$  and  $A_2$  forms, while only the later are assumed to  
828 phosphorylate the degron of other Pkl4 forms. Both phosphorylation reactions can be  
829 reverse by the constant activity of a phosphatase. We neglected the first order  
830 phosphorylation term in Lopes et al. (2015)

831 The dynamics of the three Plk4 forms is described by the following set of differential  
832 equations:

$$833 \quad \frac{dB}{dt} = s - d_0B - aBA - bB^2 + pA_1$$

$$834 \quad \frac{dA_1}{dt} = aBA + bB^2 - cAA_1 + pA_2 - pA_1 - d_1A_1$$

$$835 \quad \frac{dA_2}{dt} = cAA_1 - pA_2 - pA_2 - d_2A_2$$

836 with  $A = A_1 + A_2$ .

837 The rate of *de novo* centriole formation in the explant is assumed to be proportional  
838 Plk4 activity ( $aA + bB$ ) and therefore the probability that a droplet has no centrioles  $F$   
839 decreases in time according to:

$$840 \quad \frac{dF}{dt} = -f(aA + bB)F.$$

841 The system of four differential equations was solved numerically using the function  
842 *ode* of the package *deSolve* in the software R.

843 The stochastic solutions for the same set of reactions were obtained by the Gillespie  
844 algorithm as implemented in the function *ssa* of the package *GillespieSSA* in R. Each  
845 simulation corresponded to a droplet where the Plk4 trans-autophosphorylation was  
846 simulated independently. The biosynthesis of the first centriole was simulated as a single  
847 reaction event that removes a single “precursor”  $F$  with a propensity  $f(aA + bB)F$ . The  
848 simulated explant is assumed to form one centriole upon this event.

849 The model in differential equation and stochastic versions was used to reproduce the  
850 temporal evolution of the number of explants containing at least under different  
851 concentrations of Plk4. Experimentally four activity levels of Plk4 were obtained by  
852 mixing the cytoplasm of eggs overexpressing Plk4 and wildtype, in different proportions  
853 with expected activities relative to the overexpressing egg of 1.0, 0.5, 0.33, and 0.12  
854 (Fig. 5B and Suppl. figure 6). The corresponding levels of Plk4 activity were defined in  
855 the model through the source parameter  $s = K, K/2, K/3, K/6$ . The value of  $K$  and the  
856 remaining parameters were adjusted by solving the ordinary differential equations for  
857 variable  $F$  and visually comparing  $(1-F)$  with the experimental time course of the  
858 frequencies of explants with at least one centriole (Suppl. figure 6). The adjusted  
859 parameters were then used to simulate the stochastic kinetics. The parameter values of

860 the solutions illustrated in Supplemental figure 6 were:  $K = 0.01Nmin^{-1}$ ,  $a =$   
861  $1.0/Nmin^{-1}$ ,  $b = 0.01/Nmin^{-1}$ ,  $c = 1.0/Nmin^{-1}$ ,  $p = 0.45min^{-1}$ ,  $d_0 = d_1 = 0.01min^{-1}$ ,  
862  $d_2 = 0.38min^{-1}$ ,  $f = 0.34$ . The value of  $N$  was set to 2000 molecules for the Gillespie  
863 simulations and to the unit in the ordinary differential equations.

### 864 3D-Structured Illumination Microscopy

865 Cytoplasmic droplets were imaged with a Plan Apo 60x NA 1.42 oil objective on a  
866 GE HealthCare Deltavision OMX system, equipped with two PCO Edge 5.5 sCMOS  
867 cameras and 488 nm and 568 nm laserlines. Spherical aberrations were minimised by  
868 matching the refractive index of the immersion oil to that of the cytosol, providing the  
869 most symmetrical point spread function. 15 seconds, multi-stack time-lapses were  
870 acquired, with 0.125  $\mu$ m Z-steps and 15 frames (three angles and five phases per  
871 angle) per Z-section. Images were reconstructed in Applied Precision's softWorx  
872 software and processed using Fiji (NIH, (Schindelin et al., 2012)). Selected stills were  
873 assembled into final figures with Photoshop CS6 (Adobe).

874

## 875 **Biochemistry**

### 876 mNeonGreen purification

877 The mNeonGreen coding sequence was cloned with an N-terminus Streptavidin-  
878 Binding Peptide (SBP)-Tag and a flexible linker, into the pETMz expression vector (gift  
879 from the EMBL Protein Expression & Purification Facility, Heidelberg, Germany),  
880 between NcoI and BamHI restriction sites. The 6xHis-Z-tag-TEV-SBP-linker-  
881 mNeonGreen protein was expressed in BL21 (Rosetta) Competent *E. coli* at 25°C for 5  
882 hours. The grown liquid culture was harvested and centrifuged at 4000 rpm for 25  
883 minutes, at 4°C. The pellet was resuspended in ice-cold lysis buffer containing 50 mM  
884 K-Hepes (pH 7.5), 250 mM KCl, 1mM MgCl<sub>2</sub>, 1 mM DTT, 7 mM of Imidazole, 1x DNaseI  
885 and 1x Protease inhibitors. The sample was applied to a pre-chilled French-press,  
886 equilibrated with Lysis buffer, and run twice at a constant pressure (around 12kPa). The  
887 cell lysate was collected in a flask on ice and ultracentrifuged at 4°C for 25 min at 50000  
888 rpm using a Ti-70 rotor (Beckman). The protein purification was done through affinity  
889 chromatography on a Ni-column (HiTrap chelating HP column 1 ml, GE HealthCare).  
890 The column was loaded with a filtered solution of 100 mM nickel chloride, washed  
891 extensively with milliQ water and equilibrated with wash buffer (50 mM K-Hepes (pH 7.5),  
892 250 mM KCl, 1mM MgCl<sub>2</sub>, 1 mM DTT, 7 mM of Imidazole). The clarified lysate was

893 applied to the column (at 1.5 ml/min), followed by 200 ml wash buffer. The protein was  
894 eluted at 1.5 ml/min with elution buffer: 50 mM K-Hepes (pH 7.5), 250 mM KCl, 1mM  
895 MgCl<sub>2</sub>, 1 mM DTT, 400 mM of Imidazole. 1 ml sample fractions were collected and kept  
896 at 4°C. The most concentrated samples were pooled together and their N-terminus  
897 6xHis-Z-tag was cleaved with TEV protease overnight at 4°C by treating with 150U  
898 TEV/mg of protein. The following day, the cleaved protein was passed through a column  
899 for size-exclusion chromatography to remove contaminants, the cleaved tag and the TEV  
900 protease (with Tiago Bandejas at IBET, Oeiras, Portugal). Additionally, the elution buffer  
901 was exchanged to a storage buffer: 50 mM K-Hepes (pH 7.8), 100 mM KCl, 2 mM MgCl<sub>2</sub>,  
902 1 mM DTT, 1 mM EGTA. The HiLoad Superdex 75 16/60 (GE HealthCare) gel filtration  
903 column was equilibrated with storage buffer for 1hour. The sample was spun at 15000  
904 rpm for 15 min at 4°C and the clear fraction was applied to the gel filtration column  
905 coupled to an AKTA device at 1 ml/min. The cleaved mNeonGreen protein was  
906 concentrated approximately 5 times using Amicon 10K Centrifugal filters. Pure glycerol  
907 was added at 5% v/v and small aliquots were snap-frozen in liquid nitrogen and stored  
908 at -80°C.

#### 909 Plk4 titration in cytoplasmic extract

910 Plk4 dilution was accomplished by mixing cytoplasm from flies with different genetic  
911 composition. Unfertilised eggs collected from females overexpressing Plk4 in the  
912 germline (genotype: V32-Gal4/ pUb-Spd2-GFP; Jupiter-mCherry/pUASp-GFP-Plk4)  
913 were homogenised in unfertilised eggs from females without the transgenic pUASp  
914 element (genotype: V32-Gal4/ pUb-Spd2-GFP; Jupiter-mCherry), where all  
915 components are at wild-type levels, specifically diluting overall Plk4 concentration in the  
916 cytoplasm. Different final Plk4 concentrations were achieved by mixing Plk4  
917 overexpression:wildtype eggs at the following ratios: 6:0 (“1” relative Plk4 concentration,  
918 control); 3:3 (“0.5” relative Plk4 concentration); 2:4 (“0.33” relative Plk4 concentration)  
919 and 1:5 (“0.16” relative Plk4 concentration). Small droplets were produced from the  
920 cytoplasmic mixtures and images were acquired for 40 minutes. All time-lapse  
921 acquisitions within this section were performed at 1 minute time-interval with 0.45 µm  
922 optical sections, using a Plan Apo VC 60x 1.2 NA water objective.

923

#### 924 **Fluorescence Correlation Spectroscopy (FCS) data acquisition and** 925 **analysis**

#### 926 Standard rhodamine 6G calibration

927 All FCS measurements were performed on a point-scanning confocal microscope  
928 (Zeiss LSM780 Confocor3) equipped with a UV-VIS-IR C Achromat 40X 1.2 NA water-  
929 immersion objective and a gallium arsenide detector array wavelength selected between  
930 491-561nm. Before each experiment the system was aligned using a high concentration  
931 and calibrated using a low concentration Rhodamin 6G solution in water. The known  
932 diffusion coefficient of rhodamine 6G ( $410 \mu\text{m}^2/\text{s}$ ) (Majer and Zick, 2015) allowed us to  
933 determine the lateral beam waist ( $w_{xy} = 232 \text{ nm}$ ) and the structure factor ( $S = 5.77$ ) of  
934 the focused laser (Point Spread Function, PSF). The resultant volume of illumination is  
935 calculated through:

$$936 \quad V_{\text{eff}} = \pi^{(3/2)} \cdot w_{xy}^2 \cdot w_z = \pi^{(3/2)} \cdot w_{xy}^2 \cdot S \cdot w_{xy} = 0.401 \mu\text{m}^3 = 4.01 \cdot 10^{-16} \text{ l}$$

937 The values for  $w_{xy}$  and  $S$  were used as constants in the subsequent model-based  
938 fittings of the autocorrelation functions (ACF) and the volume was used to calculate the  
939 concentration (see below).

#### 940 Calibration with purified mNeonGreen

941 mNeonGreen fluorescent tag was first measured in a cytoplasm-compatible buffer.  
942 Fluorescence intensity in time ( $I(t)$ ) was recorded as 6 iterations of 10s. Each 10s trace  
943 was autocorrelated into an ACF,  $G(\tau)$ , using the Zeiss onboard autocorrelator which  
944 calculates the self-similarity through:

$$945 \quad G(\tau) = \langle \Delta I(t) \cdot \Delta I(t + \tau) \rangle \cdot \langle I(t) \rangle^{-2}$$

946 Here  $\langle \rangle$  denotes the time-average,  $\Delta I(t) = I(t) - \langle I(t) \rangle$  and  $\tau$  is called the timelag. The  
947 resulting  $G(\tau)$  curves of the fluorophores in buffer were readily fitted using a regular 3D  
948 diffusion model:

$$949 \quad G(\tau) = 1/N \cdot G_T(\tau) \cdot G_D(\tau)$$

950 where  $N$  reflects the number of moving particles in the confocal volume and  $G_T(\tau)$  is  
951 the correlation function associated to blinking/triplet kinetics:

$$952 \quad G_T(\tau) = 1 + T \cdot (1 - T)^{-1} \cdot \exp(-\tau/\tau_T)$$

953 Where  $T$  is the fraction of molecules in the dark state and  $\tau_T$  the lifetime of the  
954 darkstate.  $G_D(\tau)$  is the correlation function associated to diffusion which in this case is  
955 simple Brownian diffusion in 3D:

$$956 \quad G_D(\tau) = (1 + \tau/\tau_D)^{-1} \cdot (1 + S^2 \cdot \tau / \tau_D)^{-1/2}$$

957 These fittings allowed us to measure the number of molecules in the confocal volume  
958 and therefore their brightness ( $\langle I(t) \rangle / N$ ) together with the characteristic diffusion times  
959 ( $\tau_D$ ).

960 The above model fit is based on the assumption that there are only two characteristic  
961 timescales generating the ACF. In order to get a model free estimate of the number of  
962 timescales involved we used a Maximum Entropy Method based fitting (MEMfit) of the  
963 combined and normalised ACFs of each experiment. MEMfit analyses the FCS  
964 autocorrelation data in terms of a quasicontinuous distribution of diffusing components  
965 making it an ideal model to examine the ACF of a highly heterogeneous system without  
966 prior knowledge of the amount of diffusing species.

967 To be able to quantify the brightness of individual fluorescent tags in an embryo the  
968 purified mNeonGreen was injected into pUb-RFP- $\beta$ 2-Tubulin dechorionated embryos.  
969 An anomalous coefficient had to be included to fit the resultant ACF:

$$970 \quad GD(\tau) = (1 + (\tau/\tau_D)^a)^{-1} \cdot (1 + S^{-2} \cdot (\tau / \tau_D)^a)^{-(1/2)}$$

971 For simple Brownian diffusion  $a = 1$  and the fit function is identical to the one used to  
972 fit the fluorophores in buffer. However, for fluorophores injected into the cytosol of  
973 embryos the fitting algorithm gave an anomalous coefficient of  $a = 0.8$ . An anomalous  
974 coefficient smaller than 1 indicates constrained diffusion and could be caused by the  
975 more crowded environment in the yolk. In addition, the large amount of (uncorrelated)  
976 autofluorescence generated by the yolk leads to an underestimation of the brightness  
977 therefore requiring a background correction factor. The background values were  
978 determined per excitation power from embryos lacking the Plk4 reporter. If the  
979 background itself does not autocorrelate it has no influence on the obtained timescales  
980 in the data. Nevertheless, the background will impact the absolute number,  $N$ , and  
981 consequently also the calculated brightness. Therefore, all the measurements were  
982 background corrected during via:

$$983 \quad N_{\text{corr}} = N \cdot ((\langle I(t) \rangle - \text{BG}) / \langle I(t) \rangle)^2$$

984 Where BG is the measured background from embryos lacking the reporter  
985 fluorophore. Consequently the corrected brightness was calculated as:

$$986 \quad \text{BN}_{\text{corr}} = (\langle I(t) \rangle - \text{BG}) / N_{\text{corr}}$$

987 Finally, any 1 millisecond-binned intensity trace that contained changes in  
988 average intensity (most likely arising from yolk spheres moving through the confocal spot  
989 during the measurement) were discarded from further analysis.

#### 990 mNeonGreen-Plk4 measurements in embryos

991 For the measurements of mNeonGreen-Plk4, embryo staging was done based on  
992 the pUb-RFP- $\beta$ 2-Tubulin reporter. We chose embryos at blastoderm stage, in division  
993 cycles 10 or 11. Before each FCS acquisition series, a large field-of-view image of the  
994 embryo was acquired. Six different, 10 seconds long intensity traces were measured at  
995 the inter-nuclear cytoplasmic space of the syncytium. The 10s measurement was long  
996 enough to obtain sufficient passage events and short enough to avoid each trace to be  
997 contaminated by events that do not arise from mNeonGreen-Plk4 diffusing in the cytosol.

998 From these measurements, the MEMfit method on the normalised ACF indicates  
999 three timescales for the tagged-Plk4 molecules. A first timescale of 5-50  $\mu$ s  
1000 corresponding to the triplet state dynamics that were similarly found in both the buffer as  
1001 well as from fluorophores injected in the embryo. A second timescale of about 0.8ms,  
1002 most likely coming from the diffusion of a Plk4 monomer (see similarity to mNeonGreen  
1003 monomer in cytosol). And a third timescale of diffusion that is much slower, 9ms. In order  
1004 to fit the ACFs the diffusional part of the fit function was associated with two components:

$$1005 \quad GD(\tau) = f \cdot GD1(\tau) + (1 - f) \cdot GD2(\tau) =$$

$$1006 \quad f \cdot [(1 + \tau/\tau_{D1})^{-1} \cdot (1 + S^{-2} \cdot \tau / \tau_{D1})^{-(1/2)}] + (1 - f) \cdot [(1 + \tau/\tau_{D2})^{-1} \cdot (1 + S^{-2} \cdot \tau / \tau_{D2})^{-(1/2)}]$$

1007 The fraction  $f$  corresponds to the fast diffusing Plk4. The Diffusion Coefficient of each  
1008 of the components can be calculated from the diffusion timescales  $\tau_D$  via:

$$1009 \quad D = w_{xy}^2 / 4 \cdot \tau_D$$

1010

#### 1011 **In vitro experiments**

##### 1012 *Drosophila melanogaster* cell culture

1013 *Drosophila* (DMEL) cells were cultured in Express5 SFM (GIBCO, USA)  
1014 supplemented with 1x L-Glutamine-Penicillin-Streptomycin. Double-stranded RNA  
1015 (dsRNA) synthesis was performed as previously described (Bettencourt-Dias et al.,  
1016 2004). 2 million cells were plated and treated for 12 days with 40  $\mu$ g dsRNA against Plk4

1017 or mCherry (control), replacing the dsRNA every 4 days. Cells were fixed at day 10 to  
1018 confirm centriole depletion and treatment with dsRNA against PCM was initiated. Cells  
1019 were then treated for 6 days with different amounts and combinations of dsRNA: 80 µg  
1020 mCherry alone, 20 µg of individual PCM components – Cnn, Asl, D-Plp, Spd2 or  $\gamma$ -tubulin  
1021 23C – or combinations of two – Cnn + Spd2 or Cnn + D-Plp – or four components – Cnn  
1022 + Asl + D-Plp + Spd2 (referred to as 'All PCM'). Primers used for dsRNA synthesis are  
1023 listed in [Suppl. Table S5](#).

#### 1024 Immunostaining and imaging of *D. melanogaster* cultured cells

1025 DMEL cells were plated onto clean glass coverslips and allowed to adhere for 1 hour  
1026 and 30 min. The media was removed and cells were fixed at -20°C for 10 min in chilled  
1027 methanol. Cells were permeabilised and washed in D-PBSTB (1x Dulbecco's Phosphate  
1028 Buffered Saline pH 7.3, with 0.1% Triton X-100 and 1% BSA) for 1 hour. Cells were  
1029 incubated overnight at 4°C with primary antibodies – rat anti-Sas4 (dilution 1:500) kindly  
1030 provided by David Glover (University of Cambridge, UK) and rabbit anti-CP110 (dilution  
1031 1:10000; Metabion) – diluted in D-PBSTB. Cells were washed in D-PBSTB and  
1032 incubated for 1 hour 30 min at room temperature with secondary antibodies – donkey  
1033 anti-rat Alexa 555 (dilution 1:1000; Molecular Probes) and donkey anti-rabbit Alexa 647  
1034 (dilution 1:1000; Jackson ImmunoResearch Laboratories) – and DAPI (dilution 1:200) in  
1035 D-PBSTB. Cells were washed and mounted with Dako Faramount Aqueous Mounting  
1036 Medium (S3025, Agilent).

1037 Cell imaging was conducted on a Nikon Eclipse Ti-E microscope equipped with a  
1038 Yokogawa CSU-X1 Spinning Disk confocal scanner. Images were recorded with a  
1039 EMCCD Photometrics 512 camera. Optical sections of 0.3 µm thickness were acquired  
1040 with a Plan Apo 100x 1.49 NA oil immersion objective using a piezoelectric stage  
1041 (737.2SL, Physik Instrumente), controlled by Metamorph 7.5 software. Centriole number  
1042 was scored in 300 cells per treatment, per independent experiment. Data is presented  
1043 as average (with standard error mean, S.E.M.) of two independent experiments. We  
1044 tested all counts with a Chi-square test against the null-hypothesis that the outcome is  
1045 random. Then, each 16d test condition was compared to the 16d mCherry control  
1046 condition with a 2-proportions Z-test and H<sub>0</sub> that the proportions of cells with centrioles  
1047 are equal versus H<sub>A</sub> that the proportion in the test is smaller. The significance level for  
1048 multiple testing was Bonferroni corrected. Significance level was  $p = 0.01$ . All images  
1049 were processed with ImageJ (NIH, USA) and Adobe Photoshop CS6 (Adobe Systems,  
1050 USA), and the final figures were assembled in Adobe Illustrator CS6 (Adobe Systems,  
1051 USA).



1052

## 1053 **Acknowledgments**

1054 We would like to thank the Central Imaging and Flow Cytometry Facility (CIFF) at the  
1055 National Centre for Biological Sciences (NCBS) in Bangalore, where all FCS  
1056 experiments were performed.

1057 We acknowledge the technical support of IGC's Advanced Imaging Facility (AIF), in  
1058 particular Gabriel Martins and Nuno Pimpão Martins. IGC's AIF is supported by the  
1059 national Portuguese funding ref# PPBI-POCI-01-0145-FEDER-022122, co-financed by  
1060 Lisboa Regional Operational Programme (Lisboa 2020), under the Portugal 2020  
1061 Partnership Agreement, through the European Regional Development Fund (FEDER)  
1062 and Fundação para a Ciência e a Tecnologia (FCT, Portugal).

1063 We thank IGC's Fly Facility and Fly Transgenesis Facility supported by Congento  
1064 (LISBOA-01-0145-FEDER-022170), co-financed by Lisboa Regional Operational  
1065 Program (Lisboa 2020) under the Portugal 2020 Partnership Agreement through the  
1066 European Regional Development Fund (FEDER) and Fundação para a Ciência e a  
1067 Tecnologia (FCT, Portugal). Transgenic fly stocks were obtained from Bloomington  
1068 Drosophila Stock Center (NIH742 P40OD018537).

1069 We acknowledge financial support from Boehringer Ingelheim Fonds PhD Fellowship  
1070 awarded to C. Nabais, Human Frontiers Science Program (HFSP) Young Investigator  
1071 Grant (RGY0083/2016) awarded to I.A. Telley supporting J. de-Carvalho, the Fundação  
1072 para Ciência e a Tecnologia (FCT) supporting I.A. Telley (Investigador FCT  
1073 IF/00082/2013), the EU FP7-PEOPLE-2013-CIG (Nº 818743) awarded to I.A. Telley,  
1074 ERC-2010-StG-261344-CentriolStructure&Number and an ERC-2015-CoG-683258-  
1075 Birth&Death awarded to M. Bettencourt-Dias, and the Gulbenkian Foundation (FCG).  
1076 T.S. van Zanten acknowledges an EMBO fellowship (ALTF 1519-2013) and a NCBS  
1077 Campus fellowship. S. Mayor acknowledges a JC Bose Fellowship from DST  
1078 (Government of India), support from the NCBS-Max Planck Lipid Centre, a grant from  
1079 HFSP RGP0027/2012, and support from Wellcome Trust/DBT India Alliance Margdarshi  
1080 Fellowship (IA/M/15/1/502018).

1081 We thank Tiago Bandejas at Instituto de Biologia Experimental e Tecnológica  
1082 (IBET), Oeiras, for the gel filtration chromatography conducted in his facility with Micael  
1083 Freitas.

1084 We thank Tomer Avidor-Reiss, Daniel St Johnston, Yoshihiro Inoue and Jordan Raff  
1085 for sharing transgenic fly lines. We thank David Glover, Jordan Raff and Tim Megraw for  
1086 providing antibodies.

1087 We thank members of the Cell Cycle Regulation lab at IGC for giving feedback to  
1088 earlier versions of the manuscript.

1089

## 1090 **Author contributions**

1091 Conceptualization: CN, IAT, MBD

1092 Methodology: CN, JdC, IAT (egg explant assay); CN, TvZ (FCS measurements)

1093 Software: DP, JC (design and implementation of model simulations)

1094 Validation: CN, JdC, DP, TvZ, SM, JC, IAT, MBD

1095 Investigation: CN, JdC (performing data collection egg explants); CN, TvZ (performing  
1096 data collection in FCS measurements); DP, JC (collecting in silico data)

1097 Analysis: CN, IAT (experimental data from egg explants, eggs and cell culture); TvZ, SM  
1098 (FCS data); DP, JC (theoretical model)

1099 Resources: CN (CRISPR fly line, vectors and plasmid design, recombinant protein  
1100 purification); PD (genotyping); IAT (design of micromanipulation microscope)

1101 Visualization of data: CN, DP, TvZ, IAT

1102 Writing – original draft: CN

1103 Writing – review and editing: CN, SM, JC, IAT, MBD

1104 Supervision and coordination: IAT, MBD

1105

## 1106 **Competing interests**

1107 The authors declare no competing interests for this study.

1108

## 1109 **References**

- 1110 Al Jord, A., A.I. Lemaître, N. Delgehr, M. Faucourt, N. Spassky, and A. Meunier. 2014. Centriole  
1111 amplification by mother and daughter centrioles differs in multiciliated cells. *Nature*. 516:104–107.  
1112 doi:10.1038/nature13770.
- 1113 Aldrich, H.C. 1967. The Ultrastructure of Meiosis in Three Species of Physarum. *Mycologia*.  
1114 59:127–148. doi:10.2307/3756947.
- 1115 Aydogan, M.G., T.L. Steinacker, M. Mofatteh, L. Gartenmann, A. Wainman, S. Saurya, P.T.  
1116 Conduit, F.Y. Zhou, M.A. Boemo, and J.W. Raff. 2019. A free-running oscillator times and  
1117 executes centriole biogenesis. *BioRxiv*.
- 1118 Banterle, N., and P. Gönczy. 2017. Centriole Biogenesis: From Identifying the Characters to  
1119 Understanding the Plot. *Annu. Rev. Cell Dev Biol.* 33:23–49. doi: 10.1146/annurev-cellbio-  
1120 100616-060454.
- 1121 Bauer, M., F. Cubizolles, A. Schmidt, and E.A. Nigg. 2016. Quantitative analysis of human  
1122 centrosome architecture by targeted proteomics and fluorescence imaging. *EMBO J.* 35:2152–  
1123 2166. doi:10.15252/embj.
- 1124 Bettencourt-Dias, M., A. Rodrigues-Martins, L. Carpenter, M. Riparbelli, L. Lehmann, M.K. Gatt,  
1125 N. Carmo, F. Balloux, G. Callaini, and D.M. Glover. 2005. SAK/PLK4 is required for centriole  
1126 duplication and flagella development. *Curr. Biol.* 15:2199–2207. doi:10.1016/j.cub.2005.11.042.
- 1127 Bettencourt-Dias, M., F. Hildebrandt, D. Pellman, G. Woods, and S.A. Godinho. 2011.  
1128 Centrosomes and cilia in human disease. *Trends Genet.* 27:307–15.  
1129 doi:10.1016/j.tig.2011.05.004.
- 1130 Bettencourt-Dias, M., R. Giet, R. Sinka, A. Mazumdar, W.G. Lock, F. Balloux, P.J. Zafiroopoulos,  
1131 S. Yamaguchi, S. Winter, R.W. Carthew, M. Cooper, D. Jones, L. Frenz, and D.M. Glover. 2004.  
1132 Genome-wide survey of protein kinases required for cell cycle progression. *Nature*. 432:980–987.  
1133 doi.org/10.1038/nature03160.
- 1134 Blachon, S., J. Gopalakrishnan, Y. Omori, A. Polyanovsky, A. Church, D. Nicastro, J. Malicki, and  
1135 T. Avidor-Reiss. 2008. *Drosophila* asterless and vertebrate Cep152 Are orthologs essential for  
1136 centriole duplication. *Genetics*. 180:2081–94. doi:10.1534/genetics.108.095141.
- 1137 Boese, C.J., J. Nye, D.W. Buster, T.A. Mclamarrah, A.E. Byrnes, K.C. Slep, N.M. Rusan, and  
1138 G.C. Rogers. 2018. Asterless is a Polo-like kinase 4 substrate that both activates and inhibits  
1139 kinase activity depending on its phosphorylation state. *Mol. Biol. Cell.* 29:2874–2886. doi:  
1140 10.1091/mbc.
- 1141 Breslow, D.K., and A.J. Holland. 2019. Mechanism and Regulation of Centriole and Cilium  
1142 Biogenesis. *Annu. Rev. Biochem.* 88:11.1-11.34. doi: 10.1146/annurev-biochem-013118-  
1143 111153.

- 1144 Breugel, M. Van, M. Hirono, A. Andreeva, H. Yanagisawa, S. Yamaguchi, Y. Nakazawa, N.  
1145 Morgner, M. Petrovich, C. V Robinson, C.M. Johnson, D. Veprintsev, and H. Road. 2011.  
1146 Structures of Sas-6 Suggest Its Organization in Centrioles. *Science*. 331:1196–1199. doi:  
1147 10.1126/science.1199325.
- 1148 Chang, C., W. Hsu, J. Tsai, C.C. Tang, and T.K. Tang. 2016. CEP295 interacts with microtubules  
1149 and is required for centriole elongation. *J. Cell Sci*. 129:2501–2513. doi: 10.1242/jcs.186338.
- 1150 Charvin, G., C. Oikonomou, E.D. Siggia, and F.R. Cross. 2009. Origin of Irreversibility of Cell  
1151 Cycle Start in Budding Yeast. *PLoS Biol*. 8. doi:10.1371/journal.pbio.1000284.
- 1152 Conduit, P.T., A. Wainman, Z.A. Novak, T.T. Weil, and J.W. Raff. 2015. Re-examining the role of  
1153 *Drosophila* Sas-4 in centrosome assembly using two-colour-3D-SIM FRAP. *Elife*. 4.  
1154 doi:10.7554/eLife.08483.
- 1155 Cunha-Ferreira, I., A. Rodrigues-Martins, I. Bento, M. Riparbelli, W. Zhang, E. Laue, G. Callaini,  
1156 D.M. Glover, and M. Bettencourt-Dias. 2009. The SCF/Slimb ubiquitin ligase limits centrosome  
1157 amplification through degradation of SAK/PLK4. *Curr. Biol*. 19:43–49.  
1158 doi:10.1016/j.cub.2008.11.037.
- 1159 Cunha-Ferreira, I., I. Bento, A. Pimenta-Marques, S.C. Jana, M. Lince-Faria, P. Duarte, J.  
1160 Borrego-Pinto, S. Gilberto, T. Amado, D. Brito, A. Rodrigues-Martins, J. Debski, N. Dzhindzhev,  
1161 and M. Bettencourt-Dias. 2013. Regulation of Autophosphorylation Controls PLK4 Self-  
1162 Destruction and Centriole Number. *Curr. Biol*. 23:2245–54. doi:10.1016/j.cub.2013.09.037.
- 1163 Dammermann, A., T. Müller-Reichert, L. Pelletier, B. Habermann, A. Desai, and K. Oegema.  
1164 2004. Centriole assembly requires both centriolar and pericentriolar material proteins. *Dev. Cell*.  
1165 7:815–829. doi:10.1016/j.devcel.2004.10.015.
- 1166 de-Carvalho, J., O. Deshpande, C. Nabais, and I.A. Telley. 2018. A cell-free system of *Drosophila*  
1167 egg explants supporting native mitotic cycles. 144. 1st ed. Elsevier Inc. 233–257 pp. doi:  
1168 10.1016/bs.mcb.2018.03.011.
- 1169 Delattre, M., C. Canard, and P. Gönczy. 2006. Sequential protein recruitment in *C. elegans*  
1170 centriole formation. *Curr. Biol*. 16:1844–9. doi:10.1016/j.cub.2006.07.059.
- 1171 Deneke, V.E., A. Puliafito, D. Krueger, A. V Narla, A. De Simone, L. Primo, M. Vergassola, S. De  
1172 Renzis, and S. Di Talia. 2019. Self-Organized Nuclear Positioning Synchronizes the Cell Cycle in  
1173 *Drosophila* Embryos. *Cell*. 177:925–941. doi:10.1016/j.cell.2019.03.007.
- 1174 Dingle, A.D., and C. Fulton. 1966. Development of the flagellar apparatus of *Naegleria*. *J. Cell*  
1175 *Biol*. 31:43–54. doi: 10.1083/jcb.31.1.43.
- 1176 Dirksen, E.R. 1961. The presence of centrioles in artificially activated sea urchin eggs. *J. Cell*  
1177 *Biol*. 11:244–247. doi: 10.1083/jcb.11.1.244.

- 1178 Ferree, P.M., K. McDonald, B. Fasulo, and W. Sullivan. 2006. The origin of centrosomes in  
1179 parthenogenetic hymenopteran insects. *Curr. Biol.* 16:801–7. doi:10.1016/j.cub.2006.03.066.
- 1180 Fritz-Laylin, L.K., Y.Y. Levy, E. Levitan, S. Chen, W.Z. Cande, E.Y. Lai, and C. Fulton. 2016.  
1181 Rapid centriole assembly in *Naegleria* reveals conserved roles for both de novo and mentored  
1182 assembly. *Cytoskeleton.* 73:109–116. doi:10.1002/cm.21284.
- 1183 Fu, J., Z. Lipinszki, H. Rangone, M. Min, C. Mykura, J. Chao-chu, S. Schneider, N.S. Dzhindzhev,  
1184 M. Gottardo, G. Riparbelli, G. Callaini, and D.M. Glover. 2016. Conserved Molecular Interactions  
1185 in Centriole-to-Centrosome Conversion. *Nat. Cell Biol.* 18:87–99. doi:10.1038/ncb3274.
- 1186 Fulton, C., and A.D. Dingle. 1971. Basal bodies, but not centrioles, in *Naegleria*. *J. Cell Biol.*  
1187 51:826–835. doi:10.1083/jcb.51.3.826.
- 1188 Godfrey, M., S.A. Touati, M. Kataria, A. Jones, A.P. Snijders, and F. Uhlmann. 2017. PP2ACdc55  
1189 Phosphatase Imposes Ordered Cell-Cycle Phosphorylation by Opposing Threonine  
1190 Phosphorylation. *Mol. Cell.* 65:393–402. doi:10.1016/j.molcel.2016.12.018.
- 1191 Godinho, S.A., and D. Pellman. 2014. Causes and consequences of centrosome abnormalities  
1192 in cancer. *Philos. Trans. R. Soc. B Biol. Sci.* 369. doi:10.1098/rstb.2013.0467.
- 1193 Godinho, S.A., R. Picone, M. Burute, R. Dagher, Y. Su, C.T. Leung, K. Polyak, J.S. Brugge, M.  
1194 They, and D. Pellman. 2014. Oncogene-like induction of cellular invasion from centrosome  
1195 amplification. *Nature.* 510:167–171. doi:10.1038/nature13277.
- 1196 Grimes, G.W. 1973a. Origin and development of kinetosomes in *Oxytricha fallax*. *J. Cell Sci.*  
1197 13:43–53.
- 1198 Grimes, G.W. 1973b. Morphological discontinuity of kinetosomes during the life cycle of *Oxytricha*  
1199 *fallax*. *J. Cell Biol.* 57:229–232. doi: 10.1083/jcb.57.1.229.
- 1200 Guderian, G., J. Westendorf, A. Uldschmid, and E. A. Nigg. 2010. Plk4 trans-autophosphorylation  
1201 regulates centriole number by controlling betaTrCP-mediated degradation. *J. Cell Sci.* 123:2163–  
1202 2169. doi:10.1242/jcs.068502.
- 1203 Guichard, P., V. Hamel, M. Le Guennec, N. Banterle, I. Iacovache, V. Nemcikova, I. Fluckiger,  
1204 K.N. Goldie, H. Stahlberg, D. Levy, B. Zuber, and P. Gonczy. 2017. Cell-free reconstitution  
1205 reveals centriole cartwheel assembly mechanisms. *Nat. Commun.* 8. doi:10.1038/ncomms14813.
- 1206 Gutierrez-Escribano, P., and P. Nurse. 2015. A single cyclin–CDK complex is sufficient for both  
1207 mitotic and meiotic progression in fission yeast. *Nat. Commun.* 6. doi:10.1038/ncomms7871.
- 1208 Habedanck, R., Y.D. Stierhof, C.J. Wilkinson, and E.A. Nigg. 2005. The Polo kinase PLK4  
1209 functions in centriole duplication. *Nat. Cell Biol.* 7:1140–1146. doi: 10.1038/ncb1320.
- 1210 Harvey, E.B. 1936. Parthenogenetic Merogony or Cleavage without Nuclei in *Arbacia punctulata*.  
1211 *Mar. Biol. Lab.* 71:101–121. doi: 10.2307/1537411.

- 1212 Holland, A.J., D. Fachinetti, Q. Zhu, M. Bauer, I.M. Verma, E. A. Nigg, and D.W. Cleveland. 2012.  
1213 The autoregulated instability of Polo-like kinase 4 limits centrosome duplication to once per cell  
1214 cycle. *Genes Dev.* 26:2684–2689. doi:10.1101/gad.207027.112.
- 1215 Horner, V.L., A. Czank, J.K. Jang, N. Singh, B.C. Williams, J. Puro, E. Kubli, S.D. Hanes, K.S.  
1216 McKim, M.F. Wolfner, and M.L. Goldberg. 2006. The *Drosophila* Calcipressin Sarah Is Required  
1217 for Several Aspects of Egg Activation. *Curr. Biol.* 16:1441–1446. doi:10.1016/j.cub.2006.06.024.
- 1218 Idei, M., K. Osada, S. Sato, T. Nakayama, T. Nagumo, and D.G. Mann. 2013. Sperm  
1219 ultrastructure in the diatoms *Melosira* and *Thalassiosira* and the significance of the 9 + 0  
1220 configuration. *Protoplasma.* 250:833–850. doi:10.1007/s00709-012-0465-8.
- 1221 Ito, D., S. Zitouni, S.C. Jana, P. Duarte, J. Surkont, Z. Carvalho-Santos, J.B. Pereira-Leal, M.G.  
1222 Ferreira, and M. Bettencourt-Dias. 2019. Pericentrin-mediated SAS-6 recruitment promotes  
1223 centriole assembly. *Elife.* 8. doi: 10.7554/eLife.41418.
- 1224 Izquierdo, D., W.J. Wang, K. Uryu, and M.F.B. Tsou. 2014. Stabilization of cartwheel-less  
1225 centrioles for duplication requires CEP295-mediated centriole to centrosome conversion. *Cell.*  
1226 *Rep.* 8:957–965. doi:10.1016/j.celrep.2014.07.022.
- 1227 Jaqaman, K., D. Loerke, M. Mettlen, H. Kuwata, S. Grinstein, S.L. Schmid, and G. Danuser. 2008.  
1228 Robust single-particle tracking in live-cell time-lapse sequences. *Nat. Methods.* 5:695–702.  
1229 doi:10.1038/nmeth.1237.
- 1230 Joukov, V., and A. De Nicolo. 2019. The Centrosome and the Primary Cilium: The Yin and Yang  
1231 of a Hybrid Organelle. *Cells.* 8. doi: 10.3390/cells8070701.
- 1232 Keller, D., M. Orpinell, N. Olivier, M. Wachsmuth, R. Mahen, R. Wyss, V. Hachet, J. Ellenberg, S.  
1233 Manley, and P. Gönczy. 2014. Mechanisms of HsSAS-6 assembly promoting centriole formation  
1234 in human cells. *J. Cell Biol.* 204:697–712. doi:10.1083/jcb.201307049.
- 1235 Kemp, C.A., K.R. Kopish, P. Zipperlen, J. Ahringer, and K.F.O. Connell. 2004. Centrosome  
1236 Maturation and Duplication in *C. elegans* Require the Coiled-Coil Protein SPD-2. *Dev. Cell.*  
1237 6:511–523. doi: 10.1016/s1534-5807(04)00066-8.
- 1238 Khodjakov, A., C.L. Rieder, G. Sluder, G. Cassels, O. Sibon, and C. Wang. 2002. De novo  
1239 formation of centrosomes in vertebrate cells arrested during S phase. *J. Cell Biol.* 158:1171–  
1240 1181. doi:10.1083/jcb.200205102.
- 1241 Kitagawa, D., I. Vakonakis, N. Olieric, M. Hilbert, D. Keller, V. Olieric, M. Bortfeld, M.C. Erat, I.  
1242 Flückiger, P. Gönczy, and M.O. Steinmetz. 2011. Structural basis of the 9-fold symmetry of  
1243 centrioles. *Cell.* 144:364–375. doi:10.1016/j.cell.2011.01.008.
- 1244 Kitazawa, D., T. Matsuo, K. Kaizuka, C. Miyauchi, D. Hayashi, and Y.H. Inoue. 2014. Orbit/CLASP  
1245 is required for myosin accumulation at the cleavage furrow in *Drosophila* male meiosis. *PLoS*  
1246 *One.* 9. doi:10.1371/journal.pone.0093669.

- 1247 Klebba, J.E., B.J. Galletta, J. Nye, K.M. Plevoek, D.W. Buster, N. A Hollingsworth, K.C. Slep, N.M.  
1248 Rusan, and G.C. Rogers. 2015b. Two Polo-like kinase 4 binding domains in Asterless perform  
1249 distinct roles in regulating kinase stability. *J. Cell Biol.* 208:401–414. doi:10.1083/jcb.201410105.
- 1250 Klebba, J.E., D.W. Buster, A.L. Nguyen, S. Swatkoski, M. Gucek, N.M. Rusan, and G.C. Rogers.  
1251 2013. Polo-like Kinase 4 Autodeconstructs by Generating Its Slimb-Binding Phosphodegron. *Curr.*  
1252 *Biol.* 23:2255–61. doi:10.1016/j.cub.2013.09.019.
- 1253 Klebba, J.E., D.W. Buster, T.A. McLamarrah, N.M. Rusan, and G.C. Rogers. 2015a.  
1254 Autoinhibition and relief mechanism for Polo-like kinase 4. *Proc. Natl. Acad. Sci.* 112:E657–E666.  
1255 doi:10.1073/pnas.1417967112.
- 1256 Kleylein-Sohn, J., J. Westendorf, M. Le Clech, R. Habedanck, Y.D. Stierhof, and E. A Nigg. 2007.  
1257 Plk4-induced centriole biogenesis in human cells. *Dev. Cell.* 13:190–202.  
1258 doi:10.1016/j.devcel.2007.07.002.
- 1259 Kuhn, M., A.A. Hyman, and A. Beyer. 2014. Coiled-Coil Proteins Facilitated the Functional  
1260 Expansion of the Centrosome. *Plos Comput. Biol.* 10. doi:10.1371/journal.pcbi.1003657.
- 1261 La Terra, S., C.N. English, P. Hergert, B.F. McEwen, G. Sluder, and A. Khodjakov. 2005. The de  
1262 novo centriole assembly pathway in HeLa cells: cell cycle progression and centriole  
1263 assembly/maturation. *J. Cell Biol.* 168:713–722. doi:10.1083/jcb.200411126.
- 1264 Lambrus, B., K.M. Clutario, V. Daggubati, M. Snyder, G. Sluder, and A. Holland. 2015. p53  
1265 protects against genome instability following centriole duplication failure. *J. Cell Biol.* 210:63–77.  
1266 doi: 10.1083/jcb.201502089.
- 1267 Leda, M., A.J. Holland, and A.B. Goryachev. 2018. Autoamplification and Competition Drive  
1268 Symmetry Breaking: Initiation of Centriole Duplication by the PLK4-STIL Network. *iScience.*  
1269 8:222–235. doi:10.1016/j.isci.2018.10.003.
- 1270 Lerit, D.A., H.A. Jordan, J.S. Poulton, C.J. Fagerstrom, B.J. Galletta, M. Peifer, and N.M. Rusan.  
1271 2015. Interphase centrosome organization by the PLP-Cnn scaffold is required for centrosome  
1272 function. *J. Cell Biol.* 210:79–97. doi:10.1083/jcb.201503117.
- 1273 Levine, M.S., B. Bakker, B. Boeckx, J. Moyett, J. Lu, D.C. Spierings, P.M. Lansdorp, D.W.  
1274 Cleveland, F. Foijer, and A.J. Holland. 2018. Centrosome amplification is sufficient to promote  
1275 spontaneous tumorigenesis in mammals. *Dev. Cell.* 40:313–322.  
1276 doi:10.1016/j.devcel.2016.12.022.
- 1277 Lopes, C.A.M., M. Mesquita, A.I. Cunha, J. Cardoso, S. Carapeta, C. Laranjeira, A.E. Pinto, J.B.  
1278 Pereira-Leal, A. Dias-Pereira, M. Bettencourt-Dias, and P. Chaves. 2018. Centrosome  
1279 amplification arises before neoplasia and increases upon p53 loss in tumorigenesis. *J. Cell Biol.*  
1280 217:2353–2363. doi:10.1083/jcb.201711191.



- 1281 Lopes, C.A.M., S.C. Jana, I. Cunha-Ferreira, S. Zitouni, I. Bento, P. Duarte, S. Gilberto, F. Freixo,  
1282 A. Guerrero, M. Francia, M. Lince-Faria, J. Carneiro, and M. Bettencourt-Dias. 2015. PLK4 trans-  
1283 Autoactivation Controls Centriole Biogenesis in Space. *Dev. Cell.* 35:222–235.  
1284 doi:10.1016/j.devcel.2015.09.020.
- 1285 Lowe, N., J.S. Rees, J. Roote, E. Ryder, I.M. Armean, G. Johnson, E. Drummond, H. Spriggs, J.  
1286 Drummond, J.P. Magbanua, H. Naylor, R. Bastock, S. Huelsmann, V. Trovisco, M. Landgraf, S.  
1287 Knowles-barley, J.D. Armstrong, H. White-cooper, C. Hansen, R.G. Phillips, T. Uk, D. Protein, S.  
1288 Consortium, K.S. Lilley, S. Russell, and D.S. Johnston. 2014. Analysis of the expression patterns,  
1289 subcellular localisations and interaction partners of Drosophila proteins using a pigP protein trap  
1290 library. *Development.* 141:3994–4005. doi:10.1242/dev.111054.
- 1291 Mahen, R., A.D. Jeyasekharan, N.P. Barry, and A.R. Venkitaraman. 2011. Continuous polo-like  
1292 kinase 1 activity regulates diffusion to maintain centrosome self-organization during mitosis. *Proc.*  
1293 *Natl. Acad. Sci.* 108:9310–9315. doi: 10.1073/pnas.1101112108.
- 1294 Mahoney, N.M., G. Goshima, A.D. Douglass, and R.D. Vale. 2006. Making Microtubules and  
1295 Mitotic Spindles in Cells without Functional Centrosomes. *Curr. Biol.* 564–569.  
1296 doi:10.1016/j.cub.2006.01.053.
- 1297 Majer, G., and K. Zick. 2015. Accurate and absolute diffusion measurements of Rhodamine 6G  
1298 in low-concentration aqueous solutions by the PGSE-WATERGATE sequence. *J. Chem. Phys.*  
1299 142. doi: 10.1063/1.4919054.
- 1300 Marshall, W.F., Y. Vucica, and J.L. Rosenbaum. 2001. Kinetics and regulation of de novo centriole  
1301 assembly: Implications for the mechanism of centriole duplication. *Curr. Biol.* 11:308–17. doi:  
1302 10.1016/s0960-9822(01)00094-x.
- 1303 Marteil, G., A. Guerrero, A.F. Vieira, B.P. De Almeida, P. Machado, S. Mendonça, M. Mesquita,  
1304 B. Villarreal, I. Fonseca, M.E. Francia, K. Dores, N.P. Martins, S.C. Jana, E.M. Tranfield, N.L.  
1305 Barbosa-Morais, J. Paredes, D. Pellman, S.A. Godinho, and M. Bettencourt-Dias. 2018. Over-  
1306 elongation of centrioles in cancer promotes centriole amplification and chromosome  
1307 missegregation. *Nat. Commun.* 9. doi:10.1038/s41467-018-03641-x.
- 1308 Mclamarrah, T.A., D.W. Buster, B.J. Galletta, C.J. Boese, J.M. Ryniawec, N.A. Hollingsworth,  
1309 A.E. Byrnes, C.W. Brownlee, K.C. Slep, N.M. Rusan, and G.C. Rogers. 2018. An ordered pattern  
1310 of Ana2 phosphorylation by Plk4 is required for centriole assembly. *J. Cell Biol.* 217:1217–1231.  
1311 doi: 10.1083/jcb.201605106.
- 1312 Mercey, O., A.A. Jord, P. Rostaing, A. Mahuzier, A. Fortoul, A. Boudjema, M. Faucourt, N.  
1313 Spassky, and A. Meunier. 2019a. Dynamics of centriole amplification in centrosome-depleted  
1314 brain multiciliated progenitors. *Sci. Rep.* 9. doi:10.1038/s41598-019-49416-2.
- 1315 Mercey, O., M.S. Levine, G.M. Lomastro, P. Rostaing, E. Brotslaw, V. Gomez, A. Kumar, N.  
1316 Spassky, B.J. Mitchell, A. Meunier, and A.J. Holland. 2019b. Massive centriole production can

- 1317 occur in the absence of deuterosomes in multiciliated cells. *Nat. Cell Biol.* 12:1544–1552.  
1318 doi:10.1038/s41556-019-0427-x.
- 1319 Meunier, A., and J. Azimzadeh. 2016. Multiciliated cells in animals. *Cold Spring Harb. Perspect.*  
1320 *Biol.* 8:a028233. doi:10.1101/cshperspect.a028233.
- 1321 Mir, L., M. Wright, and A. Moisan. 1984. Variations in the number of centrioles, the number of  
1322 microtubule organizing centers 1 and the percentage of mitotic abnormalities in *Physarum*  
1323 *polycephalum amoebae*. *Protoplasma.* 120:20–35. doi: 10.1007/BF01287614.
- 1324 Mizukami, I., and J. Gall. 1966. Centriole replication. II. Sperm formation in the fern, *Marsilea*, and  
1325 the cycad, *Zamia*. *J. Cell Biol.* 29:97–111. doi:10.1083/jcb.29.1.97.
- 1326 Montenegro Gouveia, S., S. Zitouni, D. Kong, P. Duarte, B. Ferreira Gomes, A.L. Sousa, E.M.  
1327 Tranfield, A. Hyman, J. Loncarek, and M. Bettencourt-Dias. 2018. PLK4 is a microtubule-  
1328 associated protein that self-assembles promoting de novo MTOC formation. *J. Cell Sci.* 132.  
1329 doi:10.1242/jcs.219501.
- 1330 Moyer, T.C., K.M. Clutario, B.G. Lambrus, V. Daggubati, and A.J. Holland. 2015. Binding of STIL  
1331 to Plk4 activates kinase activity to promote centriole assembly. *J. Cell Biol.* 209:863–878.  
1332 doi:10.1083/jcb.201502088.
- 1333 Nabais, C., S.G. Pereira, and M. Bettencourt-Dias. 2018. Noncanonical Biogenesis of Centrioles  
1334 and Basal Bodies. *Cold Spring Harb. Symp. Quant. Biol.* 82:123–135.  
1335 doi:10.1101/sqb.2017.82.034694.
- 1336 Nakazawa, Y., M. Hiraki, R. Kamiya, and M. Hirono. 2007. SAS-6 is a Cartwheel Protein that  
1337 Establishes the 9-Fold Symmetry of the Centriole. *Curr. Biol.* 17:2169–2174.  
1338 doi:10.1016/j.cub.2007.11.046.
- 1339 Nigg, E.A., and A.J. Holland. 2018. Once and only once: mechanisms of centriole duplication and  
1340 their deregulation in disease. *Nat. Rev. Mol. Cell Biol.* doi:10.1038/nrm.2017.127.
- 1341 Park, J.E., L. Zhang, J.K. Bang, T. Andresson, F. Di Maio, and K.S. Lee. 2019. Phase separation  
1342 of Polo-like kinase 4 by autoactivation and clustering drives centriole biogenesis. *Nat. Commun.*  
1343 10. doi:10.1038/s41467-019-12619-2.
- 1344 Peel, N., N.R. Stevens, R. Basto, and J.W. Raff. 2007. Overexpressing centriole-replication  
1345 proteins in vivo induces centriole overduplication and de novo formation. *Curr. Biol.* 17:834–843.  
1346 doi:10.1016/j.cub.2007.04.036.
- 1347 Pelletier, L., O. Nurhan, E. Hannak, C. Cowan, B. Habermann, M. Ruer, T. Mu, and A.A. Hyman.  
1348 2004. The *Caenorhabditis elegans* Centrosomal Protein SPD-2 Is Required for both Pericentriolar  
1349 Material Recruitment and Centriole Duplication. *Curr. Biol.* 14:863–873. doi:10.1016/j.

- 1350 Pimenta-Marques, A., I. Bento, C.A.M. Lopes, P. Duarte, S.C. Jana, and M. Bettencourt-Dias.  
1351 2016. A mechanism for the elimination of the female gamete centrosome in *Drosophila*  
1352 *melanogaster*. *Science*. 353:aaf4866. doi:10.1126/science.aaf4866.
- 1353 Port, F., H.M. Chen, T. Lee, and S.L. Bullock. 2014. Optimized CRISPR/Cas tools for efficient  
1354 germline and somatic genome engineering in *Drosophila*. *Proc. Natl. Acad. Sci. U. S. A.*  
1355 doi:10.1073/pnas.1405500111.
- 1356 Rale, M.J., R.S. Kadzik, and S. Petry. 2018. Phase Transitioning the Centrosome into a  
1357 Microtubule Nucleator. *Biochemistry*. 57:30–37. doi:10.1021/acs.biochem.7b01064.
- 1358 Renzaglia, K.S., and D.J. Garbary. 2001. Motile Gametes of Land Plants: Diversity, Development,  
1359 and Evolution. *CRC. Crit. Rev. Plant Sci*. 20:107–213. doi:10.1080/20013591099209.
- 1360 Riparbelli, M.G., and G. Callaini. 2003. *Drosophila* parthenogenesis: A model for de novo  
1361 centrosome assembly. *Dev. Biol*. 260:298–313. doi:10.1016/S0012-1606(03)00243-4.
- 1362 Riparbelli, M.G., and G. Callaini. 2005. The meiotic spindle of the *Drosophila* oocyte: the role of  
1363 Centrosomin and the central aster. *J. Cell Sci*. 118:2827–2836. doi:10.1242/jcs.02413.
- 1364 Riparbelli, M.G., D. Tagu, J. Bonhomme, and G. Callaini. 2005. Aster self-organization at meiosis:  
1365 a conserved mechanism in insect parthenogenesis? *Dev. Biol*. 278:220–230.  
1366 doi:10.1016/j.ydbio.2004.11.009.
- 1367 Riparbelli, M.G., R. Stouthamer, R. Dallai, and G. Callaini. 1998. Microtubule Organization during  
1368 the Early Development of the Parthenogenetic Egg of the Hymenopteran *Muscidifurax uniraptor*.  
1369 *Dev. Biol*. 195:89–99. doi:10.1006/dbio.1997.8841.
- 1370 Rodrigues-martins, A., M. Riparbelli, G. Callaini, D.M. Glover, and M. Bettencourt-Dias. 2008.  
1371 From centriole biogenesis to cellular function: Centrioles are essential for cell division at critical  
1372 developmental stages. *Cell Cycle*. 7:11–16. doi:10.4161/cc.7.1.5226.
- 1373 Rodrigues-Martins, A., M. Riparbelli, G. Callaini, D.M. Glover, and M. Bettencourt-Dias. 2007.  
1374 Revisiting the role of the mother centriole in centriole biogenesis. *Science*. 316:1046–50.  
1375 doi:10.1126/science.1142950.
- 1376 Santos, H.G. Dos, D. Abia, R. Janowski, G. Mortuza, M.G. Bertero, M. Boutin, N. Guarin, R.  
1377 Mendez-Giraldez, A. Nunez, J.G. Pedrero, P. Redondo, M. Sanz, S. Speroni, F. Teichert, M.  
1378 Bruix, J.M. Carazo, C. Gonzalez, J. Reina, J.M. Valpuesta, I. Vernos, J.C. Zabala, G. Montoya,  
1379 M. Coll, U. Bastolla, and L. Serrano. 2013. Structure and Non-Structure of Centrosomal Proteins.  
1380 *PLoS One*. 8:e62633. doi:10.1371/journal.pone.0062633.
- 1381 Schindelin, J., I. Arganda-Carreras, E. Frise, V. Kaynig, M. Longair, T. Pietzsch, S. Preibisch, C.  
1382 Rueden, S. Saalfeld, B. Schmid, J.Y. Tinevez, D.J. White, V. Hartenstein, K. Eliceiri, P.  
1383 Tomancak<sup>1</sup>, and A. Cardona. 2012. Fiji - an Open Source platform for biological image analysis  
1384 Johannes. *Nat. Methods*. 9. doi:10.1038/nmeth.2019.Fiji.

- 1385 Shohei, Y., and D. Kitagawa. 2018. Self-organization of Plk4 regulates symmetry breaking in  
1386 centriole duplication. *BioRxiv*.
- 1387 Swaffer, M.P., A.W. Jones, H.R. Flynn, A.P. Snijders, and P. Nurse. 2016. CDK Substrate  
1388 Phosphorylation and Ordering the Cell Cycle. *Cell*. 167:1750–1761.  
1389 doi:10.1016/j.cell.2016.11.034.
- 1390 Takao, D., S. Yamamoto, and D. Kitagawa. 2019. A theory of centriole duplication based on self-  
1391 organized spatial pattern formation. *J. Cell Biol.* 218:3537–3547. doi: 10.1083/jcb.201904156.
- 1392 Tavosanis, G., S. Llamazares, G. Goulielmos, and C. Gonzalez. 1997. Essential role for  $\gamma$ -tubulin  
1393 in the acentriolar female meiotic spindle of *Drosophila*. *EMBO J.* 16:1809–1819. doi:  
1394 10.1093/emboj/16.8.1809.
- 1395 Telley, I. a, I. Gáspár, A. Ephrussi, and T. Surrey. 2013. A single *Drosophila* embryo extract for  
1396 the study of mitosis ex vivo. *Nat. Protoc.* 8:310–24. doi:10.1038/nprot.2013.003.
- 1397 Tram, U., and W. Sullivan. 2000. Reciprocal inheritance of centrosomes in the parthenogenetic  
1398 Hymenopteran *Nasonia vitripennis*. *Curr. Biol.* 10:1413–1419. doi:10.1016/S0960-  
1399 9822(00)00795-8.
- 1400 Tsuchiya, Y., S. Yoshiba, A. Gupta, K. Watanabe, and D. Kitagawa. 2016. Cep295 is a conserved  
1401 scaffold protein required for generation of a bona fide mother centriole. *Nat. Commun.* 7:1–13.  
1402 doi:10.1038/ncomms12567.
- 1403 Tyson, J.J., and B. Novak. 2001. Regulation of the Eukaryotic Cell Cycle: Molecular Antagonism,  
1404 Hysteresis, and Irreversible Transitions. *J. Theor. Biol.* 210:249–263. doi:10.1006/jtbi.2001.2293.
- 1405 Uetake, Y., J. Loncarek, J.J. Nordberg, C.N. English, S. La Terra, A. Khodjakov, and G. Sluder.  
1406 2007. Cell cycle progression and de novo centriole assembly after centrosomal removal in  
1407 untransformed human cells. *J. Cell Biol.* 176:173–182. doi:10.1083/jcb.200607073.
- 1408 Vardy, L., and T.L. Orr-Weaver. 2007. The *Drosophila* PNG Kinase Complex Regulates the  
1409 Translation of Cyclin B. *Dev. Cell.* 12:157–166. doi:10.1016/j.devcel.2006.10.017.
- 1410 Varmark, H., S. Llamazares, E. Rebollo, B. Lange, J. Reina, H. Schwarz, and C. Gonzalez. 2007.  
1411 Asterless Is a Centriolar Protein Required for Centrosome Function and Embryo Development in  
1412 *Drosophila*. *Curr. Biol.* 17:1735–1745. doi:10.1016/j.cub.2007.09.031.
- 1413 Wang, W.J., R.K. Soni, K. Uryu, and M.F.B. Tsou. 2011. The conversion of centrioles to  
1414 centrosomes: essential coupling of duplication with segregation. *J. Cell Biol.* 193:727–739.  
1415 doi:10.1083/jcb.201101109.
- 1416 Wong, Y.L., J. V Anzola, R.L. Davis, M. Yoon, A. Motamedi, A. Kroll, C.P. Seo, J.E. Hsia, S.K.  
1417 Kim, J.W. Mitchell, J. Brian, A. Desai, T.C. Gahman, A.K. Shiau, and K. Oegema. 2015.  
1418 Reversible centriole depletion with an inhibitor of Polo-like kinase 4. *Science.* 348:1155–1160.  
1419 doi:10.1126/science.aaa5111.

- 1420 Yamamoto, S., and D. Kitagawa. 2019. Self-organization of Plk4 regulates symmetry breaking in  
1421 centriole duplication. *Nat. Commun.* 10. doi:10.1038/s41467-019-09847-x.
- 1422 Yatsu, N. 1905. The formation of centrosomes in enucleated egg-fragments. *J. Exp. Zool.* 2.  
1423 doi:10.1002/jez.1400020206.
- 1424 Zhao, H., Q. Chen, C. Fang, Q. Huang, J. Zhou, X. Yan, and X. Zhu. 2019. Parental centrioles  
1425 are dispensable for deuterosome formation and function during basal body amplification. *EMBO*  
1426 *Rep.* 20. doi:10.15252/embr.201846735.
- 1427 Zitouni, S., M.E. Francia, F. Leal, S.M. Gouveia, C. Nabais, P. Duarte, S. Gilberto, D. Brito, T.  
1428 Moyer, M. Ohta, D. Kitagawa, A.J. Holland, E. Karsenti, T. Lorca, M. Lince-Faria, and M.  
1429 Bettencourt-Dias. 2016. CDK1 prevents unscheduled PLK4-STIL complex assembly in centriole  
1430 biogenesis. *Curr. Biol.* 26:1127–1137. doi:10.1016/j.cub.2016.03.055.

## FIGURE 1

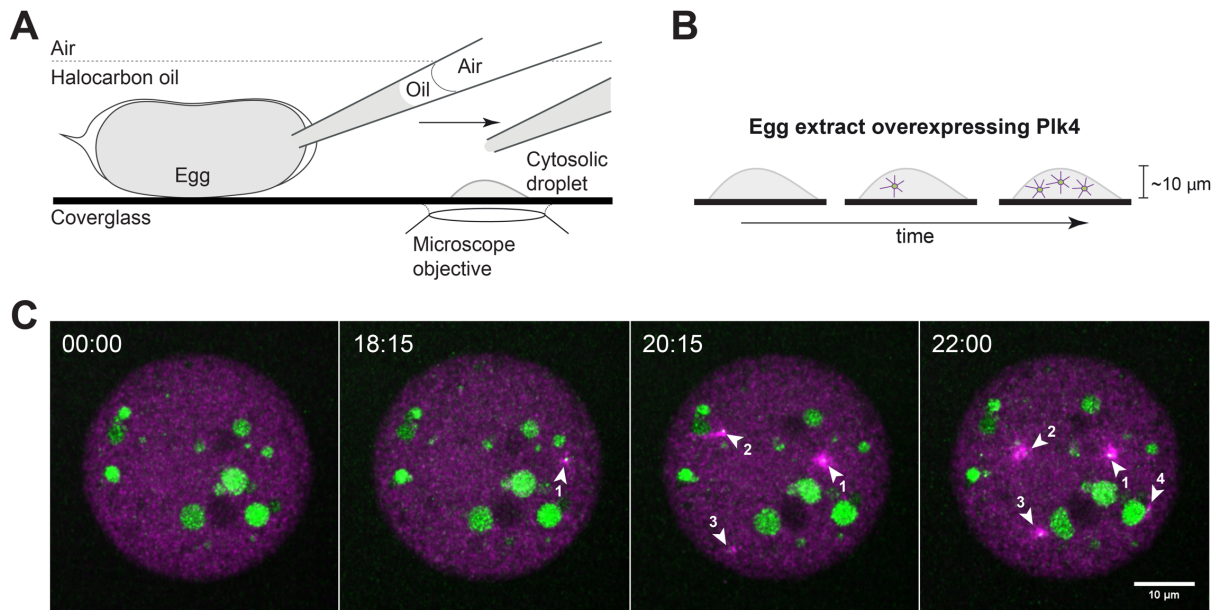

**Figure 1: Visualisation of centrosome biogenesis in *Drosophila* egg extract.** (A) *Drosophila* egg extract is prepared by rupturing the membrane and aspirating the cytoplasm with a micropipette. The content is deposited as a droplet on functionalised glass surface. (B) Each explant is followed by 3-dimensional time-lapse imaging, documenting centriole formation over time. (C) Z-projections from a time-lapse of a droplet of cytosolic extract isolated from a *Drosophila* egg overexpressing Plk4. Centrioles are absent in the first time point and form de novo throughout the experiment detected as spots (Spd2, in green) associated with a microtubule array (magenta) [arrowheads, numbers indicate the order of birth], reported by the microtubule associated protein Jupiter. The larger green blobs result from yolk autofluorescence. Time is reported as min:sec.

## FIGURE 2

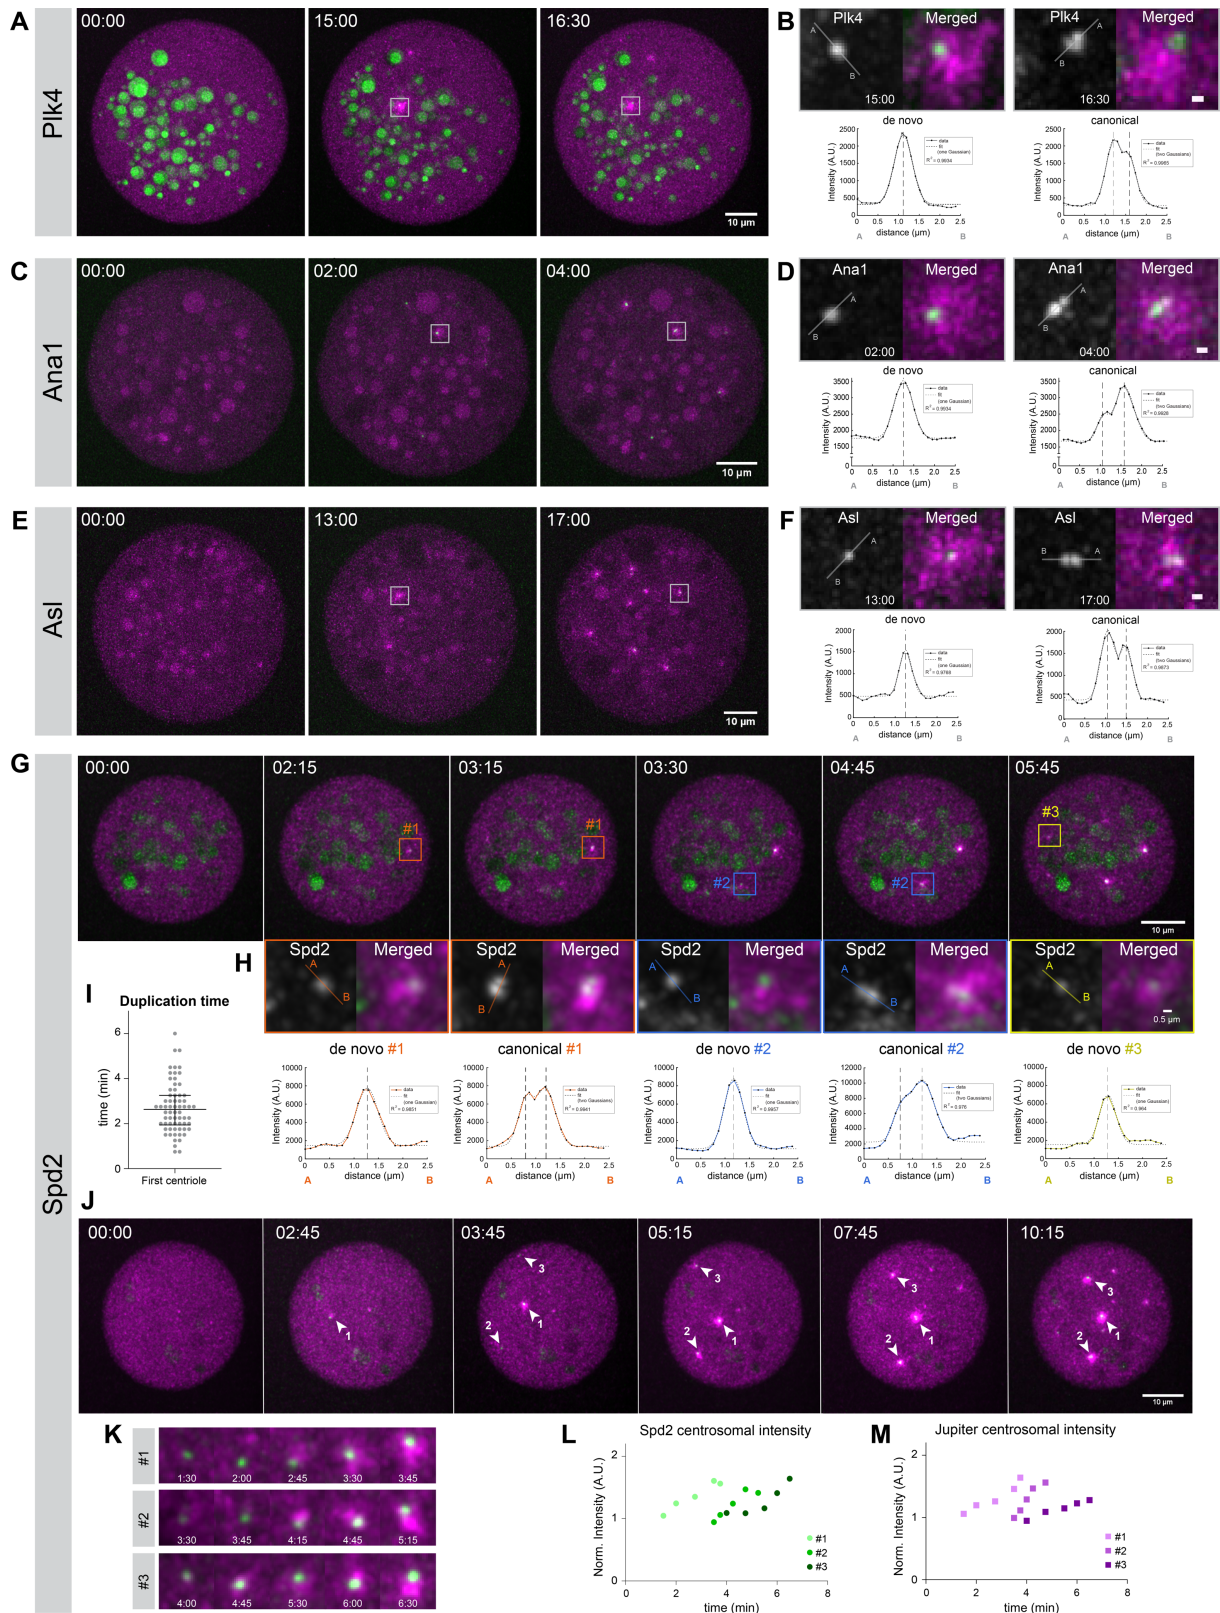

**Figure 2: Centrioles assemble de novo, mature and duplicate within the same explants, in the absence of cell-cycle progression.** Images show Z-projections from time-lapse movies of cytoplasmic explants extracted from non-cycling unfertilised eggs overexpressing Plk4. Newly assembled centrosomes load Plk4 (**A, B**), Ana1 (**C, D**), Asterless (Asl) (**E, F**) and Spd2 (**G, H, J**) shown in green

and nucleate microtubules as reported by the microtubule-associated protein Jupiter (magenta). The larger green blobs result from yolk autofluorescence, highly noticeable in the Plk4 and Spd2 panels. **(B, D, F)** Centrioles formed de novo also duplicate, which was inferred from changes in the intensity profile across the centrosomal signal (bottom plots); from a symmetrical Gaussian curve to a Gaussian mixture, suggesting the presence of more than one diffraction-limited structure (centriole). A uni- or bimodal Gaussian distribution was fitted to each “de novo” and “canonical” intensity profiles, respectively (dashed lines represent modes from fit). The coefficient of determination ( $R^2$ ) is presented for each fit. Scale-bar in small insets = 0.5  $\mu\text{m}$ . **(G)** Centrioles form de novo and canonically over time, therefore both biogenesis pathways co-occur. Centriole duplication was inferred from the change in the intensity profile across the Spd2 signal **(H, bottom plots)**. Uni- or bimodal Gaussian fitting as in **B–F**. Colors represent one centrosome that first assembled de novo and later duplicated. **(I)** The duplication time depicted in the graph is the time elapsed between the documentation of the first centriole formed de novo (unimodal density) and the detection of a centriole pair (bimodal density). The horizontal line and error bars represent the median and interquartile range ( $N = 66$  explants/eggs). **(K)** Insets of the first three centrosomes formed de novo in time-lapse **(J)** and their corresponding normalised and bleach-corrected intensity of Spd2 **(L)** and Jupiter reporting microtubules **(M)**, plotted over time. Time is reported in min:sec.



## FIGURE 3

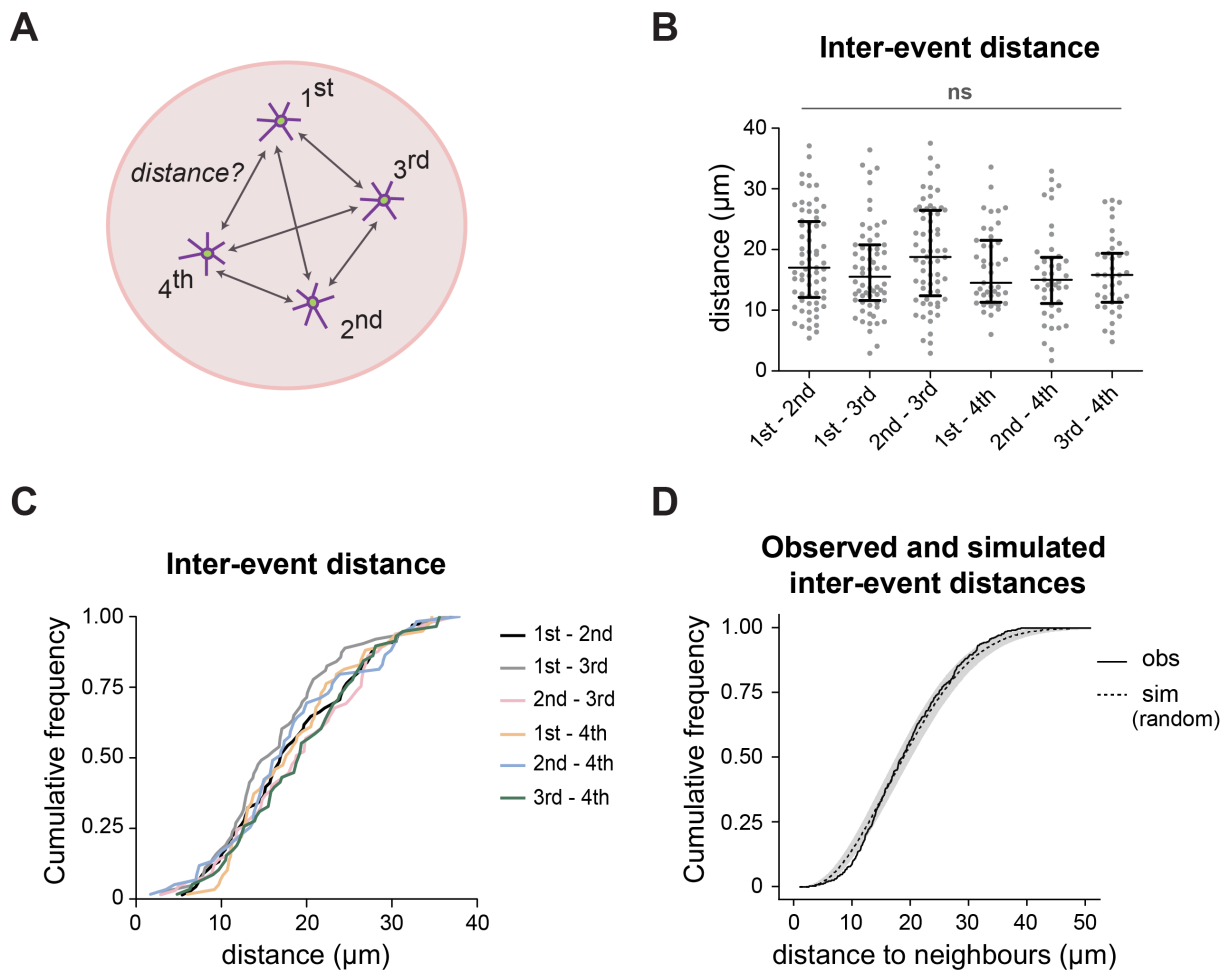

**Figure 3: Spatial organisation of de novo centriole biogenesis.** **(A)** Schematic representation of the experimental data analysis. The first four centrosomes formed de novo in the explants were tracked in 3D using the intensity signal from the Jupiter (MT reporter) channel (first tracking round) and Spd2 (centrosomal reporter) channel (second tracking round) combined. For each of the de novo birth events, an XYZT coordinate matrix was retrieved, from which the inter-event distances were calculated. Experimental N=68 droplets/eggs. Observed inter-event distances are plotted for all pairwise combinations of the first four de novo biogenesis events as a scatterplot **(B)** and as a Cumulative Distribution Function (CDF) **(C)**. The horizontal lines and error bars in **(B)**, represent the respective median and interquartile distance. No difference between mean inter-event distances (Kruskal-Wallis mean rank test, p-value= 0.467). **(D)** In silico simulations were performed to test if the observed experimental data deviates from a theoretical scenario in which all four birth events occurred at independent and identically distributed random positions with a uniform probability density distribution, within explants with similar geometry as in the experiments. Four random events were obtained in 100 simulations of 68 droplets. The graph depicts the median CDF of all experimentally observed (*obs*, solid line) and all simulated (*sim*, dashed line) inter-events distances, while the grey envelope indicates the 95% Confidence Interval (from quantile 0.025 to 0.975) for the simulated data. The experimental observations do not deviate from random simulations, suggesting that neighbour centrosomes do not influence the site where new centrosomes assemble de novo.

## FIGURE 4

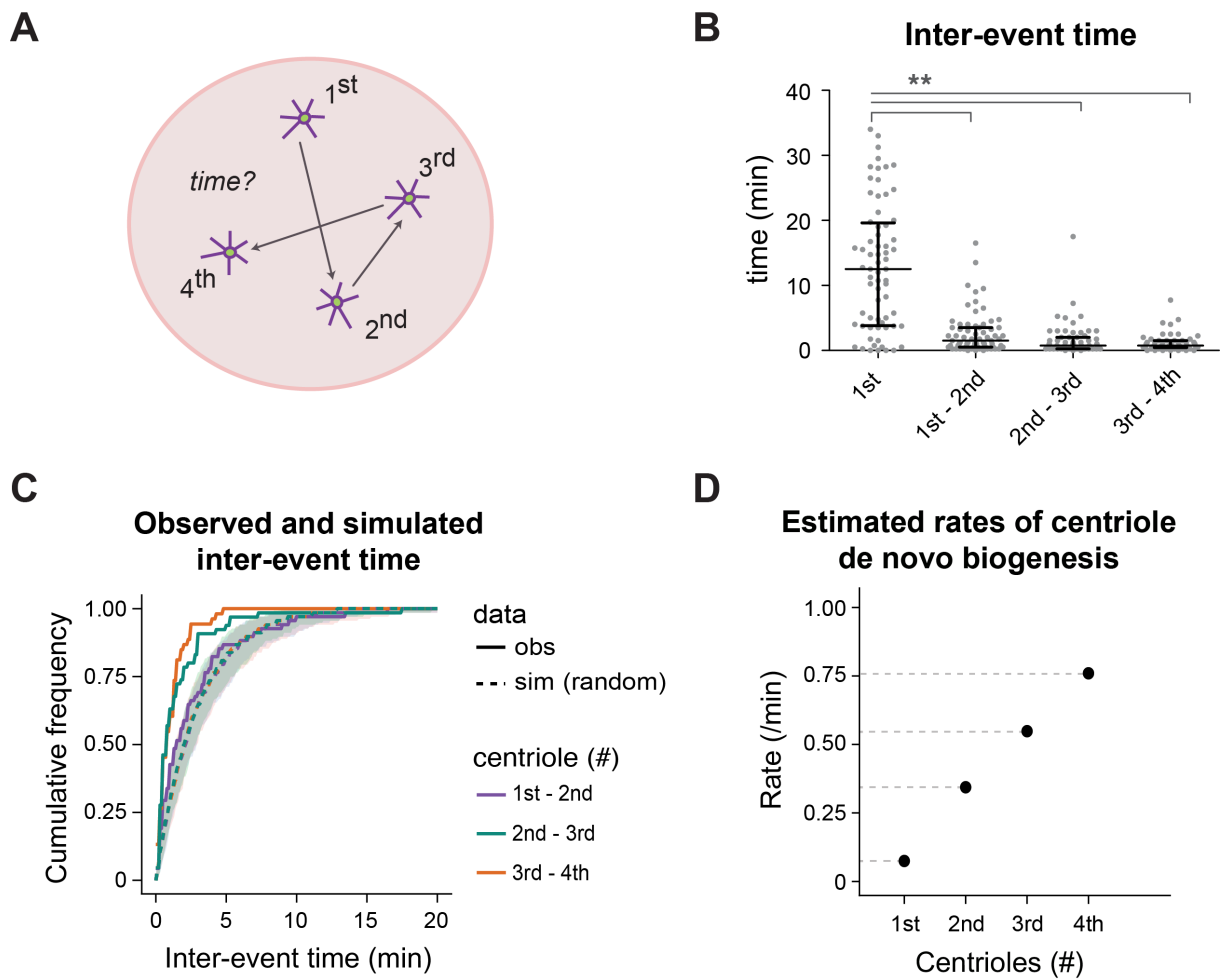

**Figure 4: Temporal kinetics of de novo centriole biogenesis.** **(A)** Schematic representation of the experimental data analysis. For each of the four de novo birth events, an XYZT coordinate matrix was retrieved, from which the inter-event time were calculated. Experimental N=68 droplets/eggs. Observed inter-event time between the first four de novo biogenesis events represented as a scatterplot **(B)** and as a Cumulative distribution function (CDF) **(C)**. The horizontal lines and error bars in **(B)**, represent the respective median and interquartile range. The inter-event time is different between the first and subsequent events (Kruskal-Wallis mean rank test, p-value= 0.0047) **(C)** In silico simulations were performed to test if the observed experimental data deviates from a theoretical scenario where all four birth events occurred independently at a constant rate within an explant with similar geometry as in the experiments. Four random events were obtained in 100 simulations of 68 droplets. Due to the high uncertainty associated with the time of birth of the first event (i.e. it is not an absolute measurement since the initial time reference is arbitrary), the rate of birth used in the modelling was approximated to the inter-event time between the first and second events. The graph depicts the median CDF of the experimentally observed (*obs*, continuous line) and simulated (*sim*, dashed line) waiting times between the first and second, second and third and third and fourth events, while the grey envelope indicates the 95% Confidence Interval (from quantile 0.025 to 0.975) for the simulations. The observed and simulated waiting time distributions do not overlap, and differ more as centriole number increases, suggesting that

the rate of biogenesis is increasing over time. **(D)** Estimation of the experimental birth rates using Maximum Likelihood (MLE) fitting. An exponential distribution with rate  $\lambda > 0$  was fitted by MLE to the CDF of each observed waiting times. The estimated rate of de novo centriole assembly is represented in the graph as a function of the number of centrioles previously/already present in the volume.

## FIGURE 5

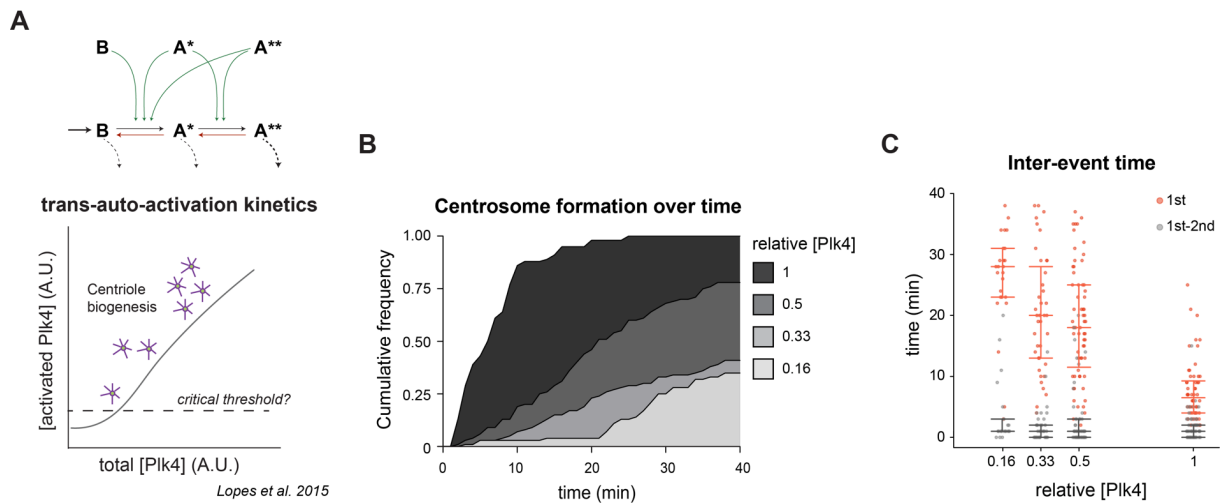

**Figure 5: Plk4 concentration modulates the onset of centrosome biogenesis. (A)** Model of Plk4 autoactivation and dephosphorylation. Plk4 trans-auto-phosphorylates to become fully active (Lopes et al. 2015), transitioning from an enzyme with basal activity – “B” form – to an activated form phosphorylated on its T-loop residue – “A\*” form. Highly phosphorylated Plk4 – “A\*\*” form – is also active but is targeted for degradation (Cunha-Ferreira et al., 2013; Guderian et al., 2010; Holland et al., 2012; Klebba et al., 2013). Dark arrows indicate the forward phosphorylation reaction flux, while red arrows indicate the reverse dephosphorylation flux catalysed by a putative counteracting phosphatase. The leftmost dark arrow marks the synthesised Plk4 that enters the system, while the dashed lines refer to Plk4 degradation. Green arrows depict the Plk4 forms that catalyse the forward flux. A non-linear balance between phosphorylation and dephosphorylation activities generates a Plk4 critical threshold, as a function of its concentration. Therefore, total concentration (active and inactive) of Plk4 in cells likely affects the timing at which a critical concentration is overcome and triggers centriole assembly. **(B)** Plk4 titrations were performed by mixing wild-type and Plk4 overexpressing eggs at different ratios. Time of onset of de novo centriole biogenesis is shown as cumulative distribution function for four relative concentrations of Plk4. Lower concentrations delay the initiation of de novo centriole biogenesis. **(C)** Time to the first de novo event, and inter-event time between the first and second de novo events in mixed explants with different concentrations of Plk4. In all dilutions tested, the time for the first event to occur is longer while the first to second inter-event time is unaffected. Median with interquartile range is presented for N=56, N=62, N=39 and N=25 explants at 1, 0.5, 0.33 and 0.16 relative concentration of Plk4, respectively.

## FIGURE 6

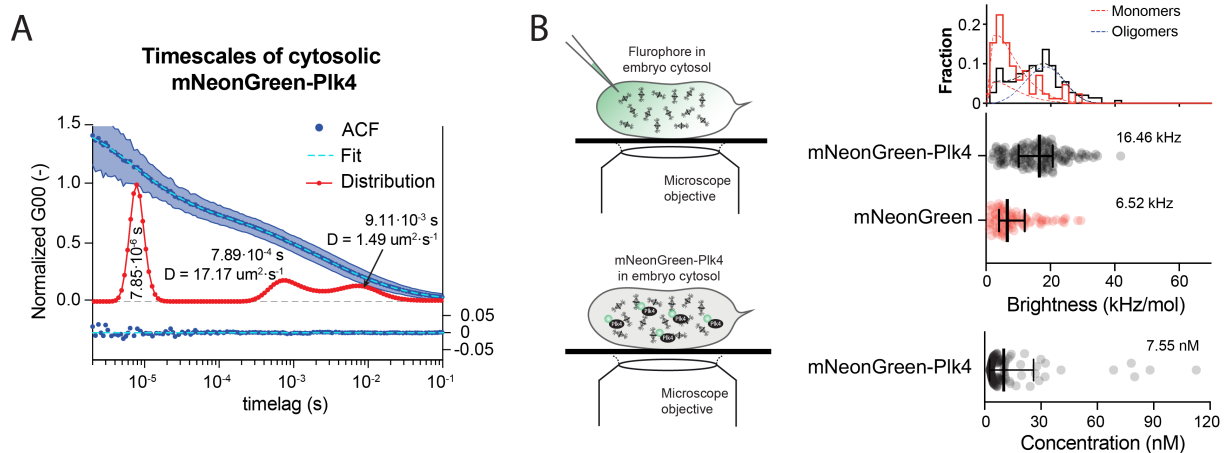

**Figure 6: Single-molecule mNeonGreen-Plk4 quantifications in the cytosol of the syncytial fly embryo by Fluorescent Correlation Spectroscopy (FCS).** (A) Normalised fitted Autocorrelation Function (ACF, “Fit” - light blue dashed line), with standard deviation (shaded area) and Maximum Entropy Method (MEM) distributions (“Distribution” – red line) for mNeonGreen-Plk4 in the cytoplasm. Based on the two fitting methods, three timescales were determined: the fastest timescale peak corresponds to the triplet state of the fluorophore ( $7.85 \times 10^{-6} \text{ s}$ ); whereas the second and third slower timescales correspond to distinct 3D diffusional mobility of mNeonGreen-Plk4 in the cytoplasm, from which the diffusion coefficients (D) were calculated (fastest fraction:  $7.89 \times 10^{-4} \text{ s}$ ,  $D = 17.2 \mu\text{m}^2/\text{s}$ ; slower fraction:  $9.11 \times 10^{-3} \text{ s}$ ,  $D = 1.49 \mu\text{m}^2/\text{s}$ ). The residuals from the fitted data (“Fit”) are shown below the graphs. (B) Plk4 undergoes limited oligomerisation in the cytosol of the *Drosophila* blastoderm embryo. The mNeonGreen distribution was fitted to a Weibull distribution, which has a peak value of 4100Hz. Next, the mNeonGreen-Plk4 data was fitted with an additional Weibull distribution (one for monomer-like and another for oligomer-like). The second mNeonGreen-Plk4 distribution peaks at 18450 Hz. From this analysis it follows that the overall normalised brightness (intensity per particle, mean  $\pm$  SD) for mNeonGreen-Plk4 in the cytoplasm is higher than for the single mNeonGreen monomer injected into the cytoplasm at a similar concentration, indicating that Plk4 is present both as a monomer (around 30.1% of its diffusing pool) and as low-order oligomers (69.9% of diffusing mNeonGreen-Plk4 pool).

## FIGURE 7

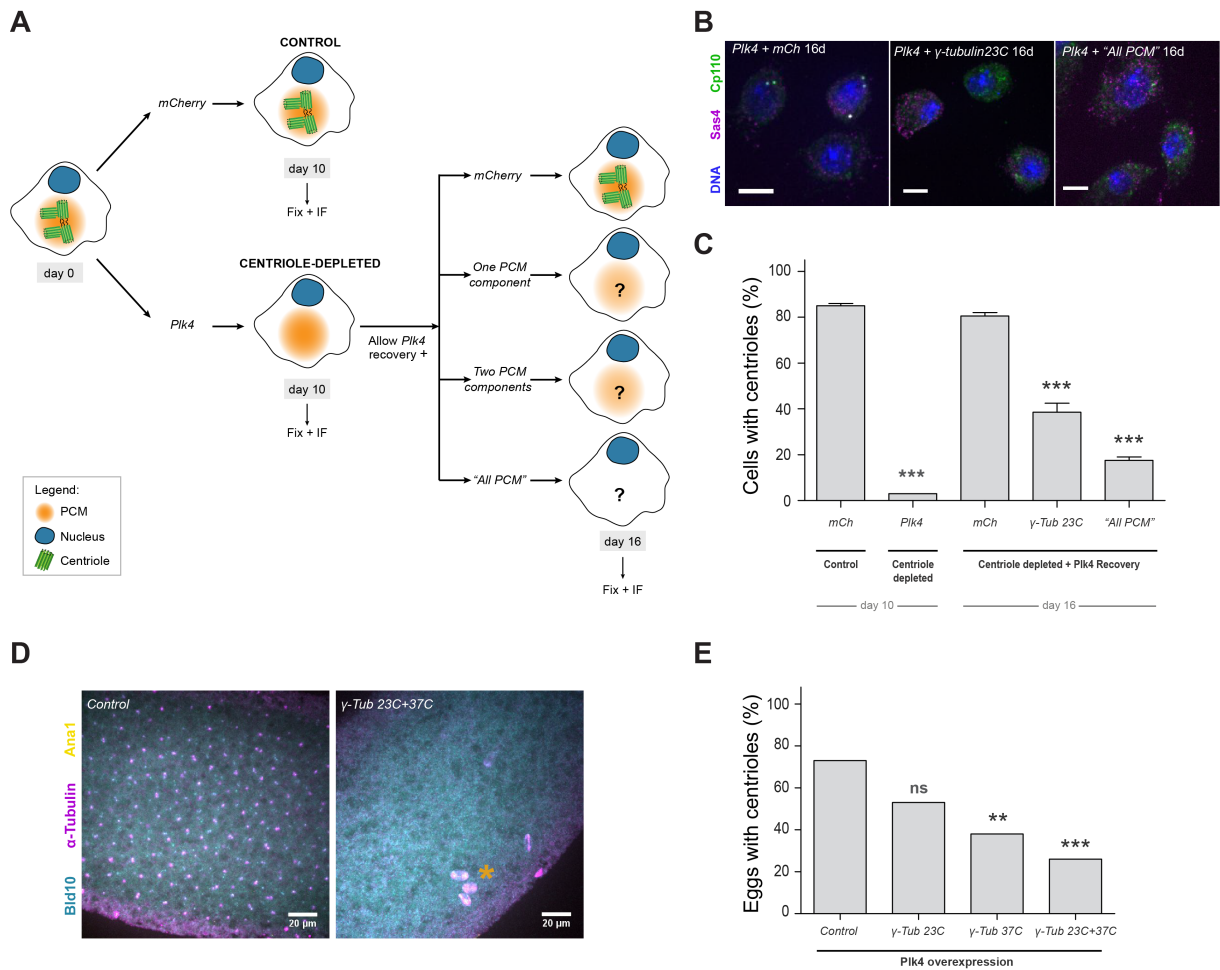

**Figure 7: Centriole de novo biogenesis is partially impaired in PCM-depleted *Drosophila* cells.**

**(A)** DMEL cultured cells were treated with RNAi against Plk4 over the course of 12 days to deplete their centrioles. mCherry (mCh) RNAi was used as negative control. After 10 days, centriole-depleted cells were allowed to recover Plk4 translation while simultaneously depleting PCM components. **(B)** Z-projections of DMEL cells at day 16 treated with RNAi against mCherry (mCh), Gamma-tubulin 23C or "All PCM". Cells were stained with antibodies against Sas4 (magenta), Cp110 (green) and DAPI-stained (DNA, blue). Scale-bar = 5  $\mu$ m. **(C)** Quantification of cells with centrioles after 10 and 16 days of RNAi treatment. Centriole number was scored in 300 cells per treatment, per independent experiment. Data is presented as average (with standard error of the mean - S.E.M.) of two independent experiments. Superscripts '\*' denote statistical significance in treatments, where \*, \*\* and \*\*\* indicate  $p < 0.05$ , 0.01, 0.001 (Pearson's  $\chi^2$  test and 2-proportions Z-test). **(D)** Z-projections of unfertilised eggs overexpressing Plk4 alone (Control) or in combination with RNAi against Gamma-tubulin 23C and 37C together. Eggs were stained with antibodies against Bld10 (cyan), Ana1 (yellow) and tyrosinated  $\alpha$ -tubulin (magenta). Yellow asterisk highlights putative meiotic defects, previously described in oocytes from  $\gamma$ -tubulin 37C mutant females (Tavosanlis et al. 1997). **(E)** Depletion of Gamma-tubulin 37C alone or together with Gamma-tubulin 23C impairs/limits de novo centriole biogenesis in unfertilised eggs overexpressing Plk4. Presence of centrioles was scored in eggs collected from virgin females aged for 4 hours. N=30

eggs (control); N=49 eggs (Gamma-tubulin 23C); N=47 eggs (Gamma-tubulin 37C); N=54 eggs (Gamma-tubulin 23C + 37C). \*\*p< 0.01, Pearson's  $\chi^2$  test and 2-proportions Z-test.

## SUPPLEMENTARY FIGURES

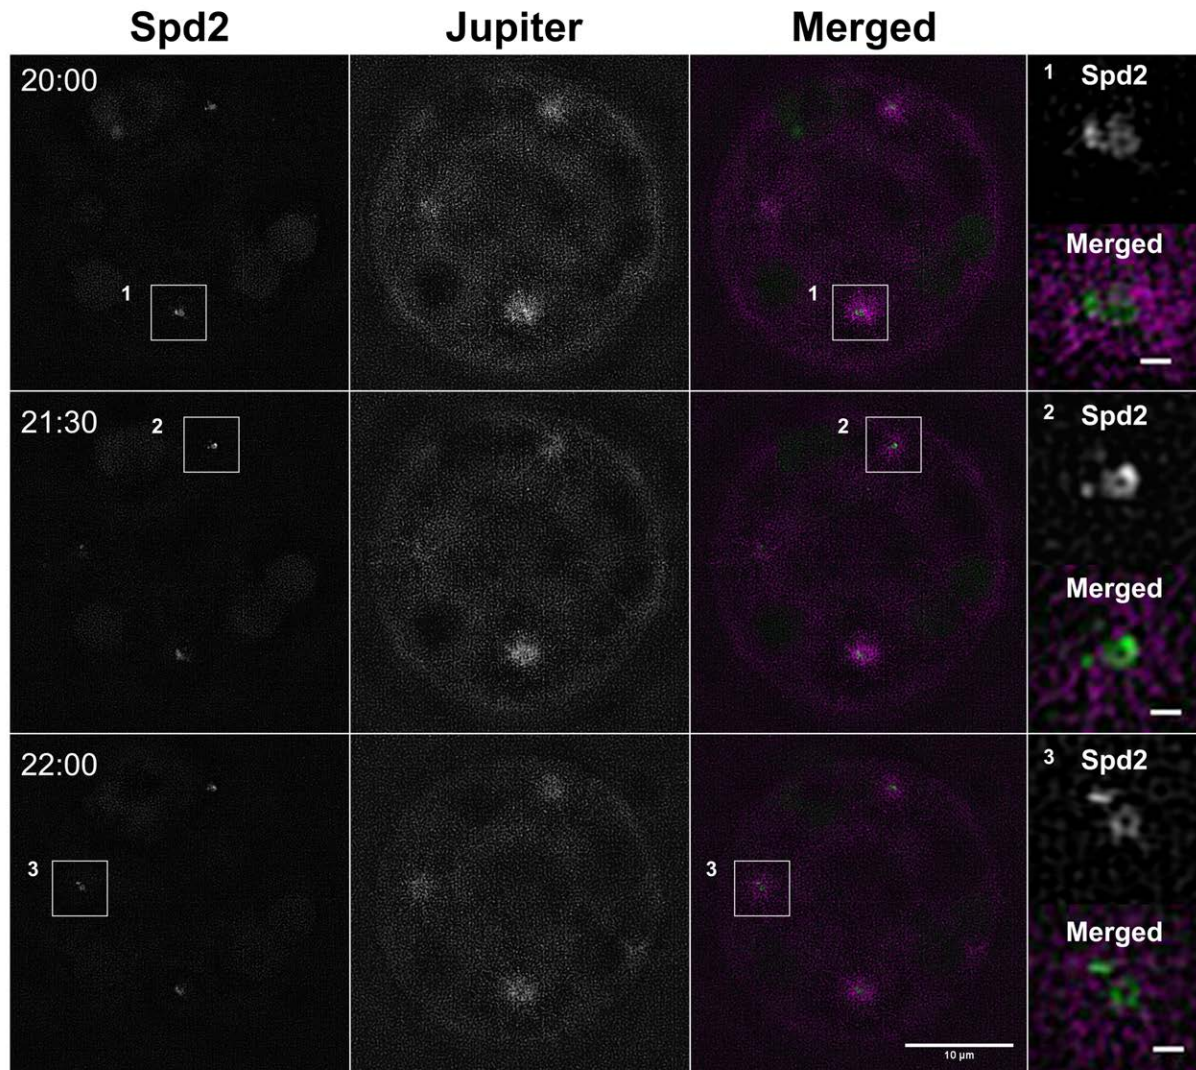



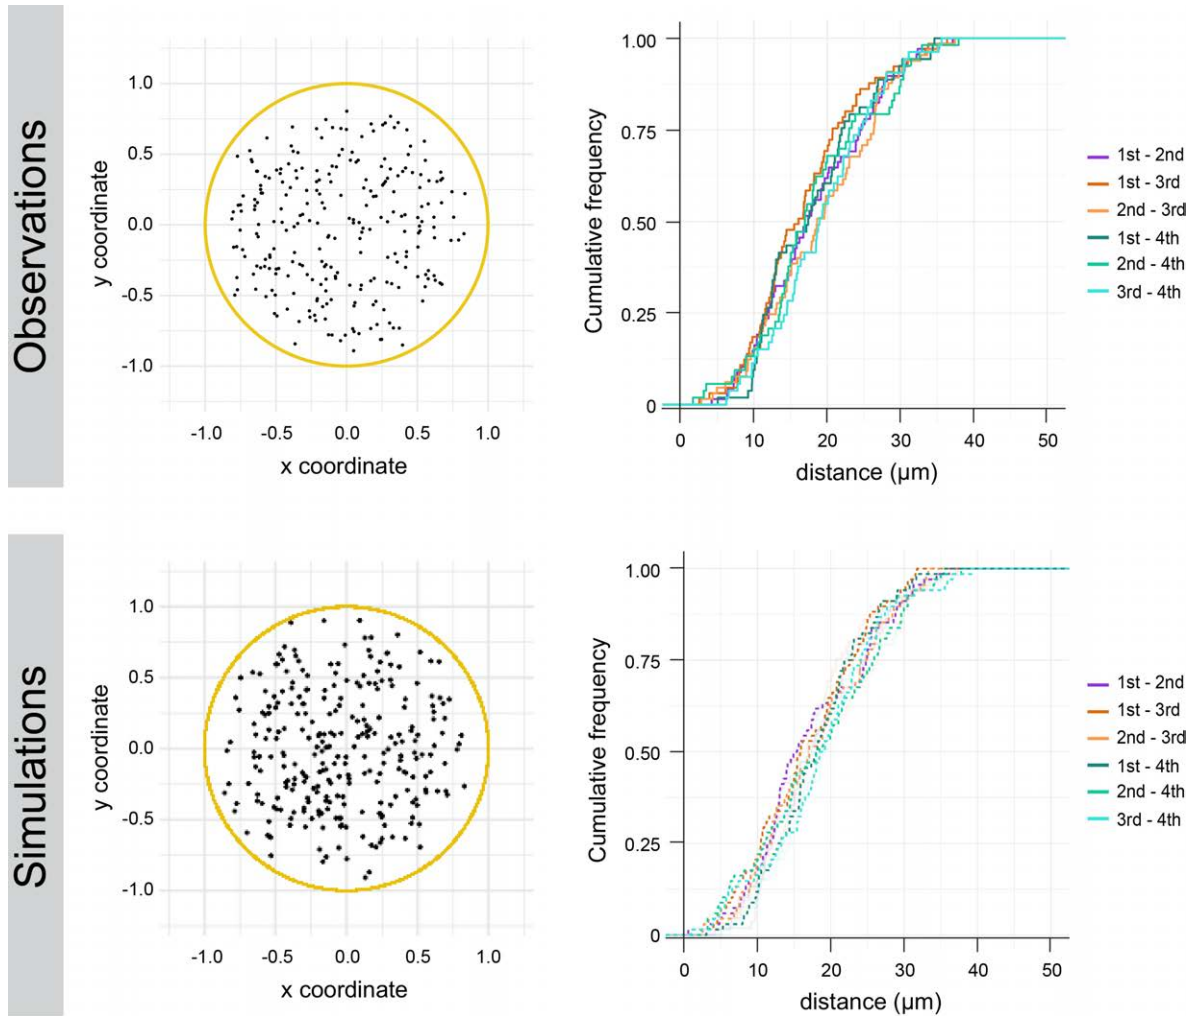

**Supplementary Figure 2 (support to Figure 3): Spatial analysis of de novo centriole biogenesis in fly explants.** **Left:** 2D Z-projections of the positions of centrioles at the moment they were first detected in the explants - 254 centrioles measured in 68 droplets (“Observations”) and 272 centrioles from 68 simulated droplets (“Simulations”). All coordinates were normalised to the measured droplet diameter. **Right:** Distributions of observed and simulated inter-event distances measured in 3D for the first four centrosomes formed de novo in the explants.

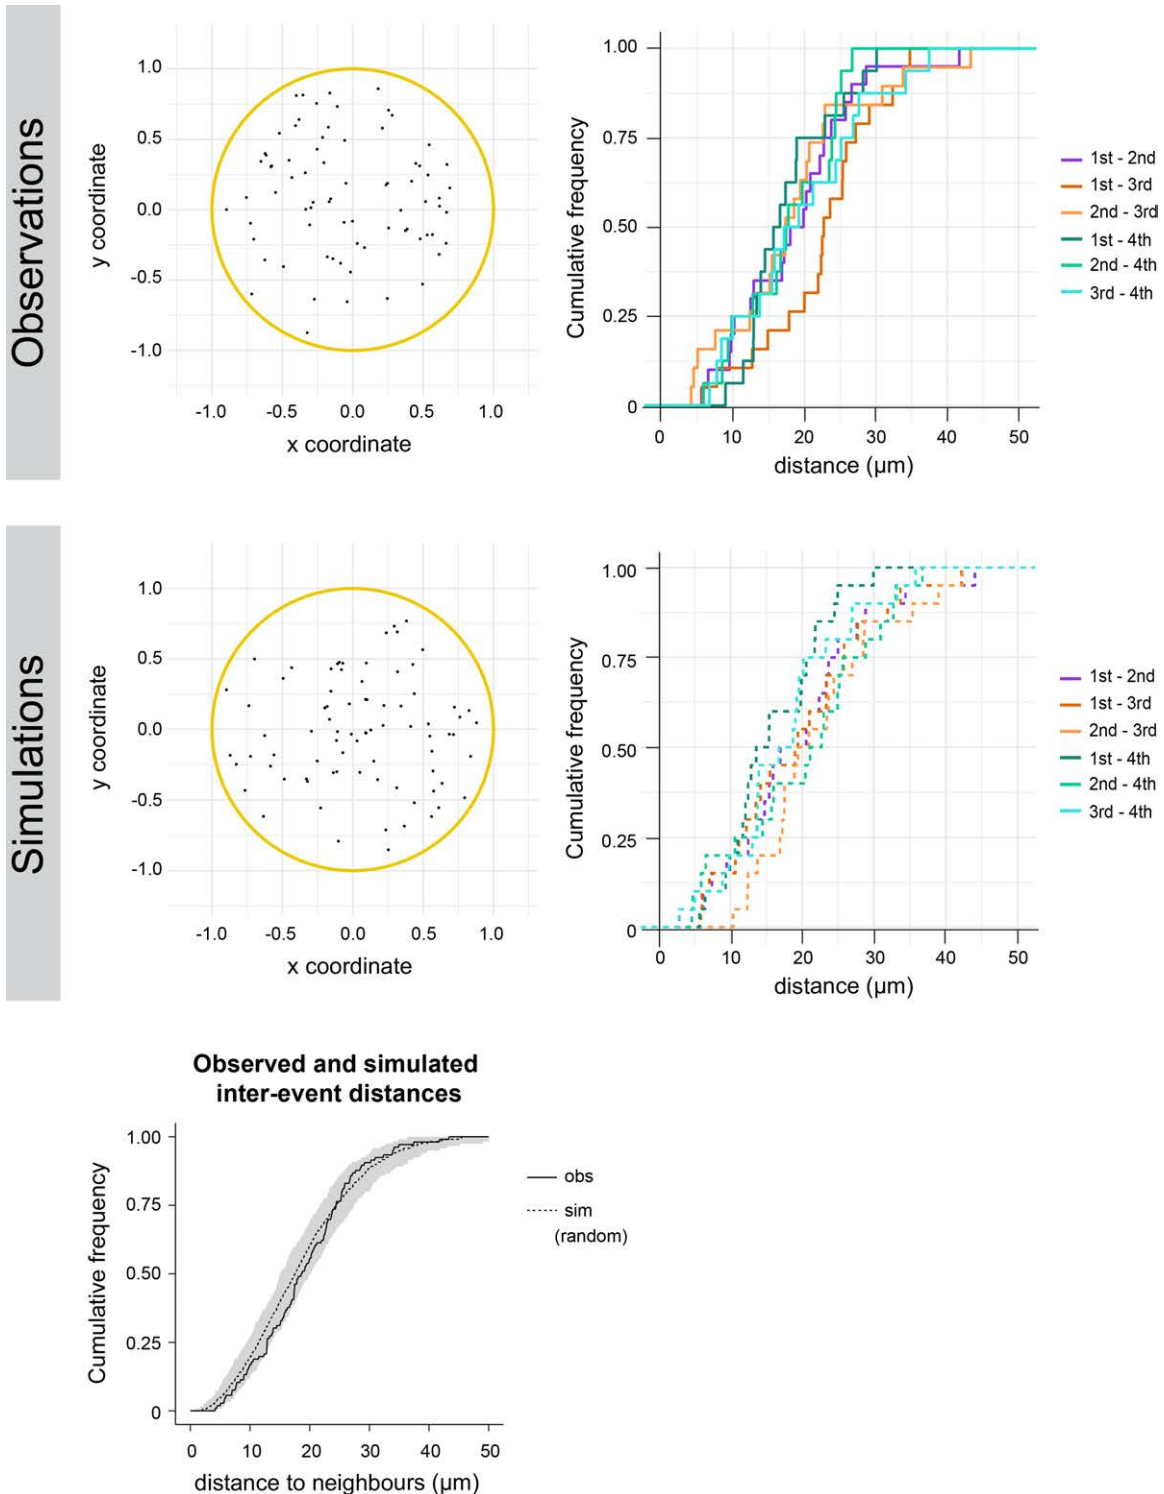

**Supplementary Figure 3 (support to Figure 5): Spatial analysis of de novo centriole biogenesis in fly explants, at lower Plk4 concentration. Left:** Z-projections of the positions of centrioles at the moment they were first detected in the explants - 75 centrioles measured in 20 droplets (“Observations”) and 80 centrioles from 20 simulated droplets (“Simulations”). All coordinates were normalised to the measured droplet diameter. **Right:** Distributions of observed and simulated inter-event distances measured in 3D for the first four centrosomes formed de novo in the explants, at the lowest Plk4 overexpression (“0.16” relative concentration of Plk4). The grey envelope indicates the 95% Confidence Interval (from quantile 0.025 to 0.975) for the simulated data.

### PLK4 autoactivation and dephosphorylation model

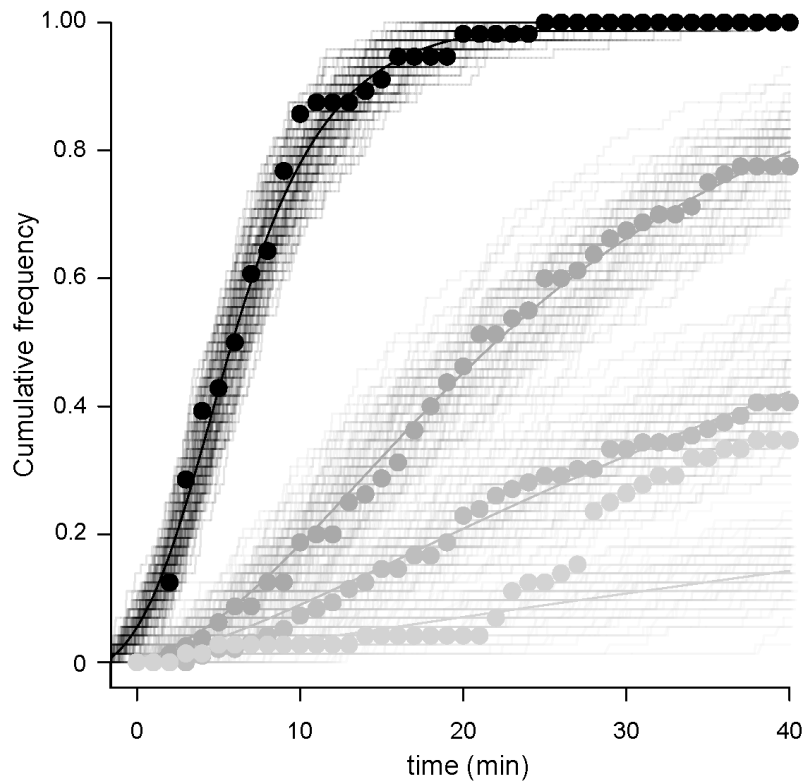

**Supplementary Figure 4 (support to Figure 5): Fitting of Plk4 autoactivation and dephosphorylation model to data measured in explants at different Plk4 concentrations.** The colour gradient represents different concentrations of Plk4. The different concentrations were prepared experimentally by mixing the cytoplasm from high overexpression eggs (taken as the unit “1”, black) with cytoplasm from wild-type eggs, in different proportions such that the dilutions are “0.5”, “0.33” and “0.16” relative concentrations. The dots are the relative frequency of explants containing at least one de novo formed centriole for the different concentrations of Plk4 (“1” (N = 56), “0.5” (N = 62), “0.33” (N = 39) and “0.16” (N = 25)). The lines are the solution of the model of Plk4 trans-autophosphorylation. The continuous lines are the solution of the ordinary differential equation model and the staircase lines are the results of stochastic simulations under the same parameter settings. The Plk4 activity in the High overexpression (denoted K) was adjusted, whereas the activities in the dilutions were set in relative terms (0.16K, 0.33K and 0.5K). The modelling and simulations, as well as the remaining parameters and values are described in section [Statistics and mathematical modelling](#). Notice that as Plk4 concentration decreases, so does the number of droplets where centriole biogenesis occurs within 40 minutes of time-lapse recording

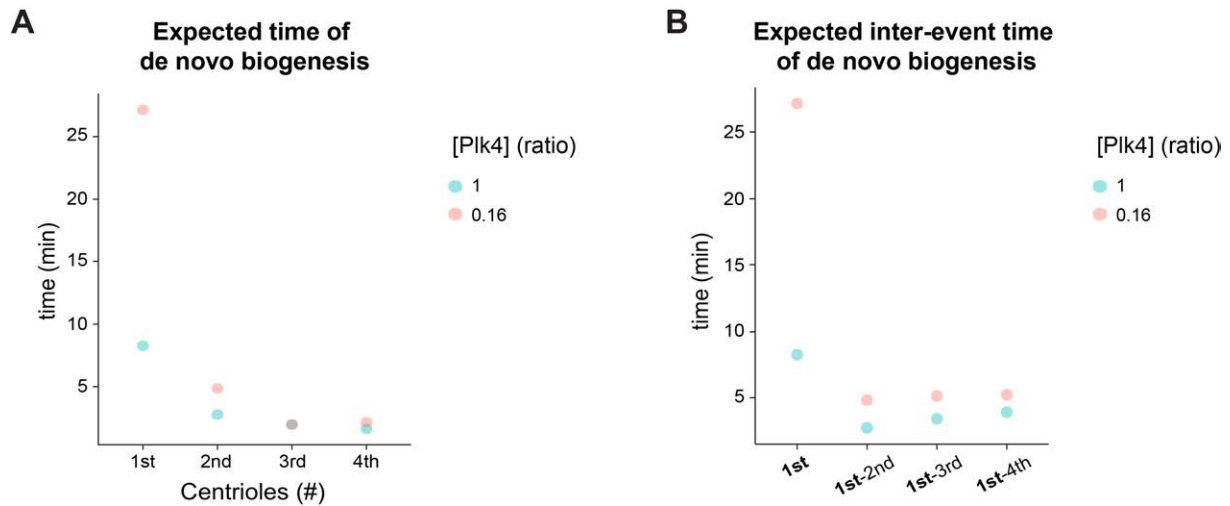

**Supplementary Figure 5 (support to Figure 5): Temporal kinetics of de novo centriole biogenesis at different concentrations of Plk4.** (A) Estimation of the mean centriole biogenesis times at high Plk4 overexpression (“1”, in blue) and at the lowest Plk4 overexpression (“0.16”, in orange) by ML estimation (MLE) fitting of a simple exponential model. (B) Estimation of the waiting time until the first de novo event and inter-event time between the first and subsequent de novo events, at high (“1”, in blue) and the lowest (“0.16”, in orange) overexpression of Plk4.

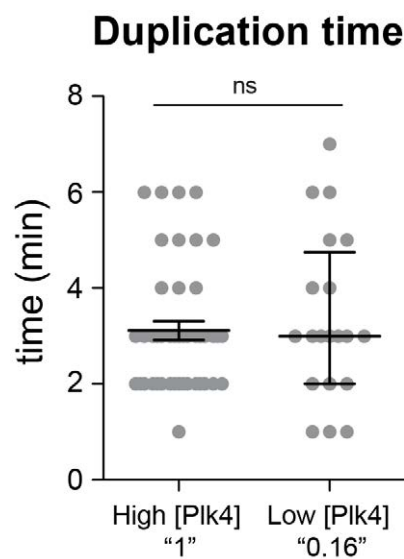

**Supplementary Figure 6 (support to Figure 5): The duplication time of the first centriole formed de novo is similar at high (“1”) and low Plk4 concentration (“0.16”).** Centrioles formed de novo duplicate, on average, 3 min after their biogenesis, at both high (“1”, N = 44 centrioles) and the lowest (“0.16” Plk4 Dilution, N = 20 centrioles) overexpression of Plk4. The horizontal lines and error bars represent the respective median and interquartile distance. The duplication time is not statistically different between the two conditions (Mann-Whitney test, p-value = 0.59).

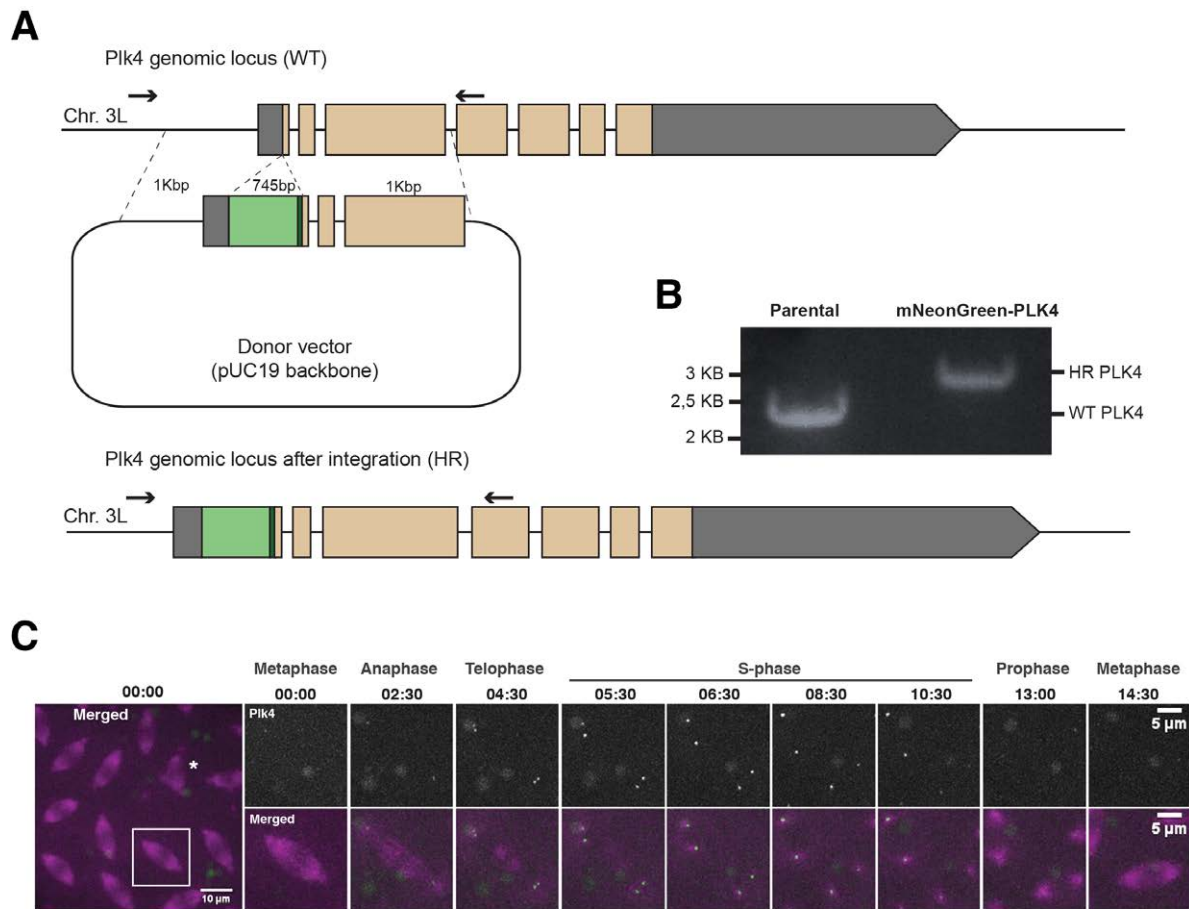

**Supplementary Figure 7 (support to Figure 6): Insertion of a fluorescent tag into *Drosophila* Plk4 endogenous locus. (A)** Schematic representation of the wild-type dmPlk4 locus (WT) and of the dmPlk4 locus after successful tag integration (HR). A donor plasmid carrying the mNeonGreen reporter and a small linker (dark green) flanked by 1 Kbp homology arms was used for homologous recombination. The UTRs are shown in grey and the coding sequences are depicted in orange. The arrows indicate the position of the screening primers dmPLK4 5UTR 3 FW and dmPLK4 1exon Rev, which are located outside the homology arms. **(B)** Integration of a fluorescent tag into Plk4 endogenous locus (HR Plk4) causes a migration shift of the PCR product in the agarose gel compared to the untagged Plk4 locus (WT Plk4). **(C)** Z- projection from a time-lapse video of a syncytial *D. melanogaster* embryo expressing endogenous mNeonGreen-Plk4 (green) and microtubule reporter RFP- $\beta$ -tubulin (magenta). Plk4 localises at the centrosomes (high intensity tubulin spots) in interphase. Larger green dots result from yolk auto-fluorescence. At timepoint t=00:00 the embryo is in metaphase of nuclear cycle 11. The insets show the progression of a single nucleus and its daughters, throughout one cell-cycle. The cell-cycle stage is indicated above each image. Time is reported as min:sec. The asterisk indicates an abnormal mitotic spindle.

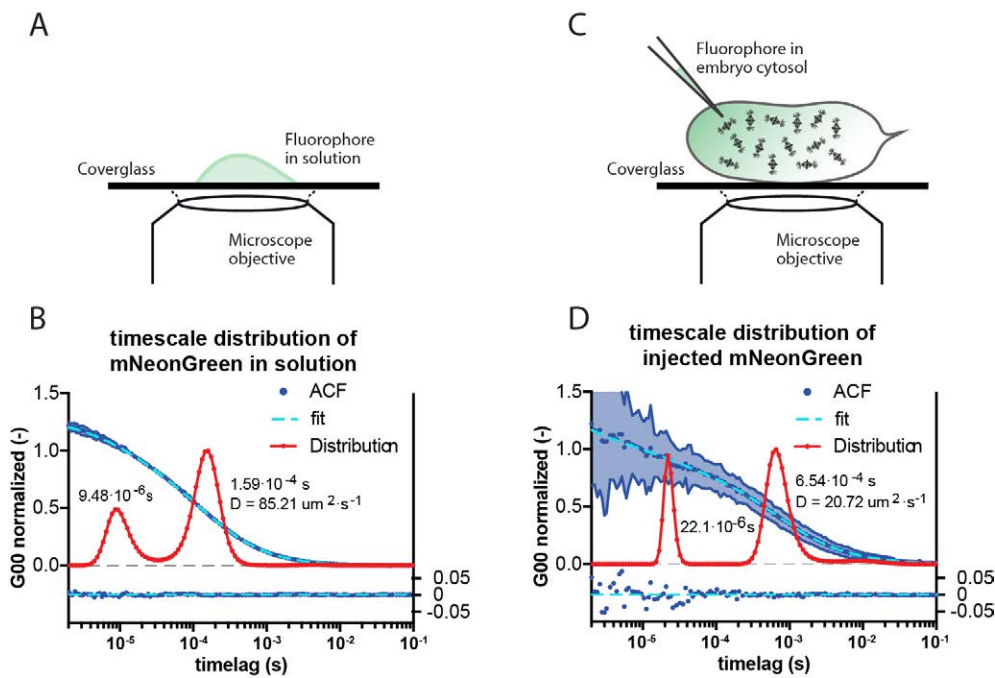

**Supplementary Figure 8 (support to Figure 6): FCS measurements of purified mNeonGreen fluorophore. (A, B)** Measurements of mNeonGreen in a buffer supporting viability of the cytoplasm (Telley et al 2013). **(C, D)** Measurements of mNeonGreen after injection into the cytosol of syncytial embryos expressing RFP-Tubulin. **(B, D)** show normalised fitted Autocorrelation Functions (ACF, blue dots and light-blue curve), with standard deviation (shaded area) and Maximum Entropy Method (MEM) Fit (red line). The time lags (diffusion times) determined using the two fitting methods shown next to the MEM-fit curves are in agreement. The peak at the fast timescale corresponds to the triplet state of the fluorophore ( $9.48 \times 10^{-6}$  s in solution;  $22 \times 10^{-6}$  s in the cytoplasm), whereas the second peak in the slower timescale corresponds to the 3D diffusion of mNeonGreen, from which a diffusion coefficient  $D$  was calculated ( $1.59 \times 10^{-4}$  s,  $D = 85.21 \mu\text{m}^2/\text{s}$  in solution;  $6.54 \times 10^{-4}$  s,  $D = 20.72 \mu\text{m}^2/\text{s}$  in the cytoplasm). The residuals obtained from the best fit are shown below the graphs.

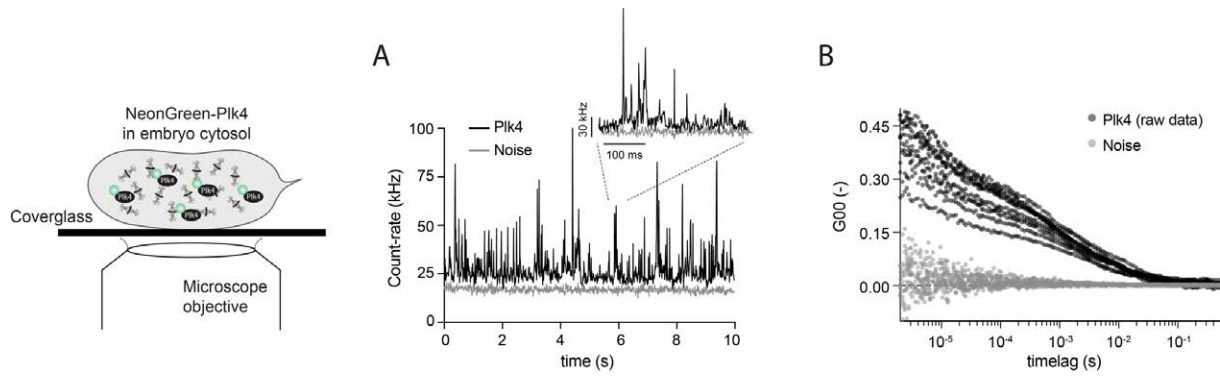

**Supplementary Figure 9 (support to Figure 6): Single-molecule mNeonGreen-Plk4 quantifications in the cytosol of the syncytial fly embryo. (A)** Intensity traces of mNeonGreen-Plk4 (black) and background noise (grey). Of note, intensity bursts of mNeonGreen-Plk4 are well distinguishable from background noise (inset). **(B)** Raw auto-correlation functions (ACF) from multiple independent FCS measurements. While the intensity of background acquisitions as measured in RFP-Tubulin expressing embryos does not autocorrelate, traces from mNeonGreen-Plk4 expressing embryos exhibit significant autocorrelation.

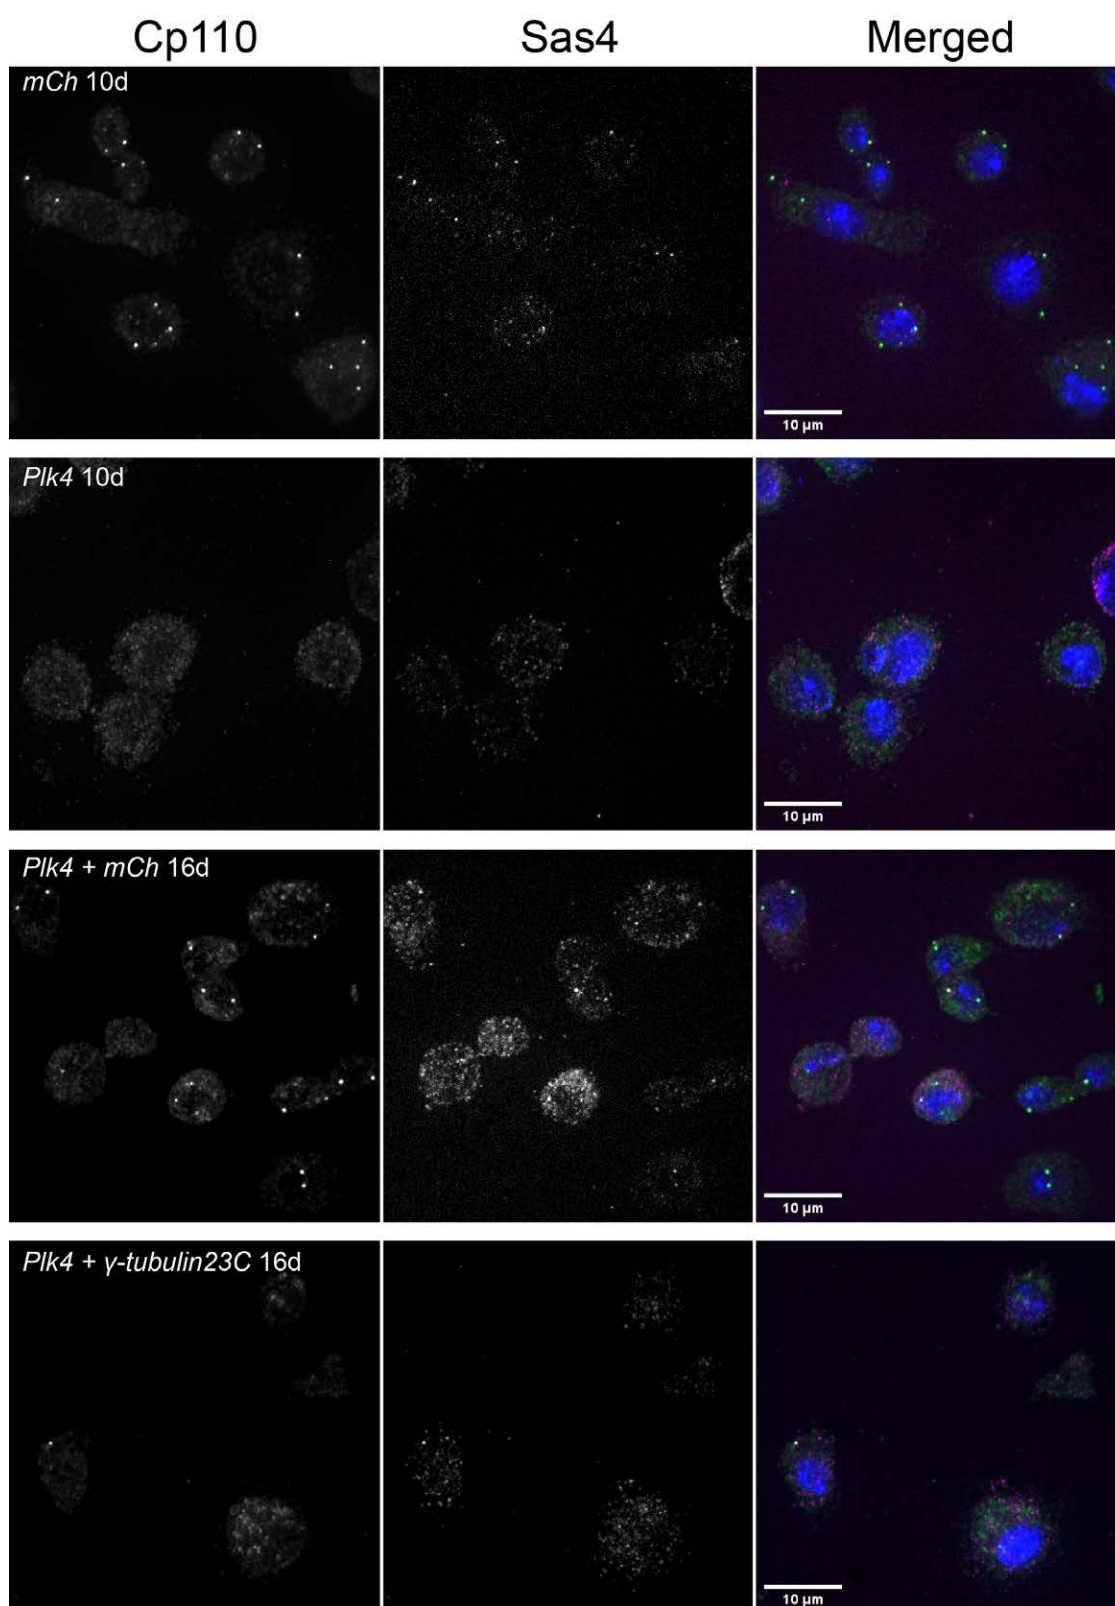

**Supplementary Figure 10 (support to Figure 7): Centriole de novo biogenesis is partially impaired in PCM-depleted DME1 cells. (A)** Z-projections of DME1 cells treated with RNAi against Plk4 or mCherry (mCh) for 10 days. Cells treated with RNAi against Plk4 gradually lose centrioles during



proliferation. After 10 days, centriole-depleted cells were allowed to recover Plk4 translation while simultaneously treated for four days with RNAi against individual PCM components – Cnn, Asl, D-Pip, Spd2 or  $\gamma$ -tubulin 23C – or combinations of two; some are specifically needed for PCM assembly in mitosis – Cnn and Spd2 (Conduit eLife 2014) – and during interphase – Cnn and D-Pip (Lerit JCB 2015). Additionally all four of these components – Cnn + Asl + D-Pip + Spd2 (“All PCM”) were shown to be essential for PCM maintenance (Pimenta-Marques et al., 2016). The panels show centriole-depleted cells treated with RNAi against mCherry (recovering centriole normal number) and  $\gamma$ -tubulin 23C (abnormal centriole number). Cells were stained with centriolar markers Sas4 (magenta) and Cp110 (green); and DAPI-stained (DNA, in blue). **(B)** Quantification of centriole number per cell after 10 and 16 days of RNAi treatment. Data are the average of two independent experiments (with standard error of the mean - S.E.M.). Superscripts ‘\*’ denote statistical significance in treatments, where \*, \*\* and \*\*\* indicate  $p < 0.05$ , 0.01, 0.001 (Pearson’s  $\chi^2$  test and 2-proportions Z-test).

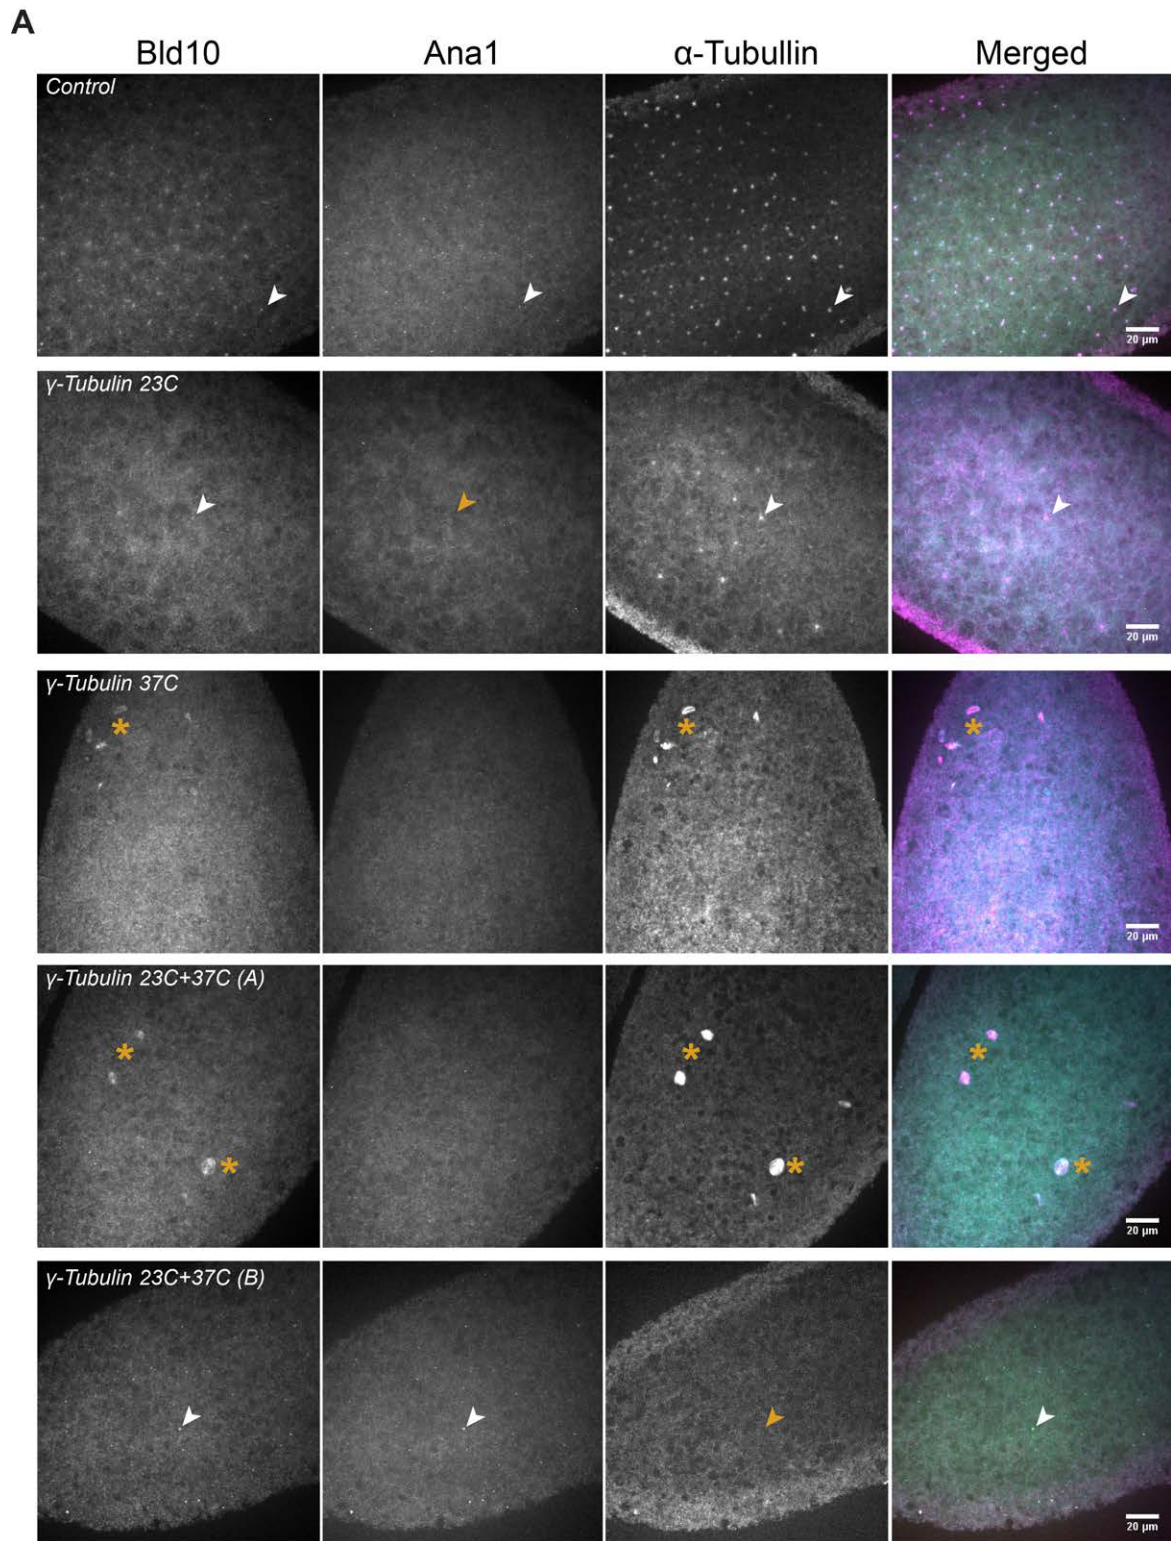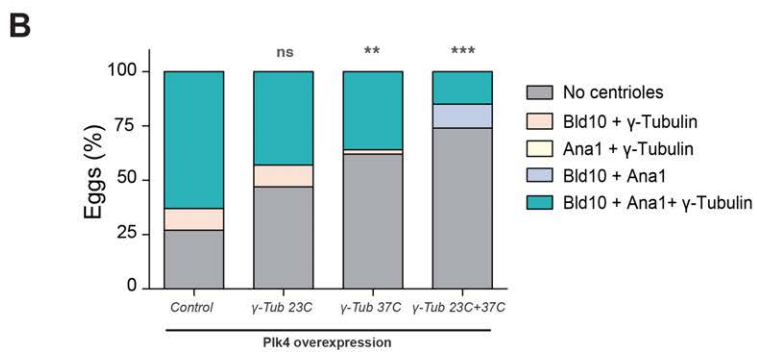

**Supplementary Figure 11 (support to Figure 7): De novo centriole biogenesis is partially impaired in unfertilised eggs overexpressing Plk4 and depleted for Gamma-tubulin. (A)** Z-projections of unfertilised eggs overexpressing Plk4 alone (Control) or together with RNAi against  $\gamma$ -tubulin 23C,  $\gamma$ -tubulin 37C or both. Eggs were stained with Bld10 (cyan), Ana1 (yellow) and tyrosinated  $\alpha$ -tubulin (magenta). Centrioles (arrowheads) were identified by co-localisation of at least two of these markers. Yellow arrowheads depict centrioles for which one of the centrosomal proteins is not detected. Yellow asterisks reveal putative meiotic defects, previously described to occur in oocytes from  $\gamma$ -tubulin 37C mutant females (Tavosanis et al EMBO Journal 1997). **(B)** Quantification of unfertilised eggs with de novo centriole assembly driven by Plk4 overexpression and detected by the combination of two or three of either Bld10, Ana1 or tyrosinated  $\alpha$ -tubulin. \*\* $p < 0.01$ , Pearson's  $\chi^2$  test and 2-proportions Z-test.

## SUPPLEMENTARY TABLES

**Supplementary Table 1:** *D. melanogaster* strains generated and/or used in this study.

| Allele                                  | Source                                        |
|-----------------------------------------|-----------------------------------------------|
| mNeonGreen-Plk4 (endogenous)<br>$\beta$ | This study                                    |
| pUb-RFP- 2-Tubulin                      | Kitazawa et al., 2014                         |
| nanos-Cas9                              | Bloomington Drosophila Stock Center ID: 54591 |
| V32-Gal4                                | Bloomington Drosophila Stock Center ID: 7062  |
| pUASp-Plk4                              | Rodrigues-Martins et al., 2007                |
| pUb-Spd2-GFP                            | homemade                                      |
| (endo promoter) Ana1-tdTomato           | Blachon et al., 2008                          |
| pUASp-GFP-Plk4                          | homemade                                      |
| (endo promoter) AsI-mCherry             | Conduit et al., 2015                          |
| Jupiter-GFP (endogenous)                | Bloomington Drosophila Stock Center ID: 6836  |
| Jupiter-mCherry (endogenous)            | Lowe et al., 2014                             |
| pUASp-shRNA $\gamma$ -Tubulin 23C       | This study                                    |
| pUASp-shRNA $\gamma$ -Tubulin 37C       | This study                                    |

**Supplementary Table 2:** List of oligonucleotides used for CRISPR-mediated knock-in of mNeonGreen into the endogenous *Drosophila melanogaster* Plk4 locus. The guide RNA (gRNA) was used to target the genome editing at dmPlk4 N-terminus. The three combinations of primers were used to clone the donor vector with the mNeonGreen fluorescent reporter. A short flexible linker (highlighted in blue) was placed between the coding sequences of mNeonGreen and Plk4.

| Construct name      | Forward (5'-3')                                 | Reverse (5'-3')                                          |
|---------------------|-------------------------------------------------|----------------------------------------------------------|
| dmPLK4 gRNA         | (sense) GTCGGCTAGCTATGTTATCCAAT                 | (antisense)<br>AAACATTGGATAACATAGCTAGC                   |
| 5' Homology Arm     | CATATGCGAGGACACTTTCCAGCACTAC                    | GAATTCAGCTAGCCTTTTTCTGTAGACTT<br>ACTGAGCCACTTCGAATG      |
| 3' Homology Arm     | GGTACCATGTTATCGAATCGAGCGTTTGG<br>AGAAACAATTGAGG | GGATCCTAGAGTGAGATTCTACTAGC                               |
| mNeonGreen + linker | GAATTCATGGT GAGCAAGGGCGAGGAG                    | GGTACCGCCGGAGCCGCCGCCCGCGGA<br>GCCGCCCTTGACAGCTCGTCCATGC |

**Supplementary Table 3: Sequencing and screening primers used to check the mNeonGreen-Plk4 line generated in this study.**

| Oligo name           | Sequence (5'-3')           | Purpose                                |
|----------------------|----------------------------|----------------------------------------|
| U6-3_seq_F2          | GCTCACCTGTGATTGCTCC        | sequencing the gRNAs cloned into pCFD3 |
| dmPLK4 5UTR 1REV     | CATTAGTGAAGATCATTAGCCAGC   | sequencing the 5' UTR region of dmPlk4 |
| dmPLK4 5UTR 1FW      | CAAATATATTGGTGATAGTGCAGCCC | sequencing the 5' UTR region of dmPlk4 |
| dmPLK4 5UTR 2 REV    | CCGAAACAATGCCTAATGAGATATG  | sequencing the 5' UTR region of dmPlk4 |
| dmPLK4 5UTR 2 FW     | GGGCTCAGCTTATTGTGGGATCGG   | sequencing the 5' UTR region of dmPlk4 |
| dmPLK4 5UTR 3 REV    | GCTGGAAAGTGCTCGAAAATCC     | sequencing the 5' UTR region of dmPlk4 |
| dmPLK4 5UTR 3 FW     | GGCGTAGAAGCTGATGGATAATTGC  | Screening for positive insertions      |
| dmPLK4 5UTR 4 REV    | GCCGCAGTGTGCCGAACCTTTTCG   | sequencing the 5' UTR region of dmPlk4 |
| dmPLK4 5UTR 4 FW     | GACGCCGAAGATGCCAGACTATC    | sequencing the 5' UTR region of dmPlk4 |
| dmPLK4 5UTR 5 FW     | CCCTCTTATCGGGCTTGGCATCAAG  | sequencing the 5' UTR region of dmPlk4 |
| dmPLK4 (155-177) REV | ACGCGGTTAGTGAGTCCAGTGC     | sequencing within the dmPlk4 gene      |
| dmPLK4 F 501-521     | TGAGCGCCATATGACCATGT       | sequencing within the dmPlk4 gene      |
| dmPLK4 (745-768) REV | GGCGGGCGTCCAACCAGCAGGGTG   | sequencing within the dmPlk4 gene      |
| dmPLK4 1exon Rev     | GGAAGCACTTGTTGTGGTCTCTGAG  | Screening for positive insertions      |
| dmPLK4 F 1000        | AATTGCCTTATGAACAGACAGGT    | sequencing within the dmPlk4 gene      |
| Sak 5 exon R         | ATCTCGTAGGCCATCCAATCTCTG   | sequencing within the dmPlk4 gene      |
| dmPLK4 F 1501-1521   | AAAGTCACATACTTCAGTAC       | sequencing within the dmPlk4 gene      |

**Supplementary Table 4: FCS Parameters determined from the model-based fittings.** Total number of measurements and embryos analysed and diffusion model applied to each experimental condition. According to the model, either one or two diffusion components were determined and their characteristic timescales and diffusion coefficients calculated. The fraction of each diffusing pool is presented as a percentage.

|                                | No. of measurements/<br>No. of embryos | Diffusion model          | timescale 1<br>(ms) | Diffusion coeff 1<br>( $\mu\text{m}^2/\text{s}$ ) | Fraction<br>of $\tau_{D1}$ (%) | timescale 2<br>(ms) | Diffusion coeff 2<br>( $\mu\text{m}^2/\text{s}$ ) | Fraction<br>of $\tau_{D2}$ (%) |
|--------------------------------|----------------------------------------|--------------------------|---------------------|---------------------------------------------------|--------------------------------|---------------------|---------------------------------------------------|--------------------------------|
| mNeonGreen in solution         | 24                                     | 1 component 3D           | 0.15                | 85.2                                              | 100                            |                     |                                                   |                                |
| mNeonGreen in the cytosol      | 85 / 9                                 | 1 component anomalous 3D | 0.65                | 20.7                                              | 100                            |                     |                                                   |                                |
| mNeonGreen-Plk4 in the cytosol | 147 / 11                               | 2 component 3D           | 0.79                | 17.2                                              | 52.3                           | 9.11                | 1.49                                              | 47.7                           |

**Supplementary Table 5: List of primers used for dsRNA synthesis.** The overhangs for in vitro transcription with the T7 RNA polymerase are depicted in blue.

| Gene                 | Reference                      | CG No.  | Forward Sequence (5' - 3')                          | Reverse Sequence (5' - 3')                           |
|----------------------|--------------------------------|---------|-----------------------------------------------------|------------------------------------------------------|
| <i>mCherry</i>       | -                              | -       | TAATACGACTCACTATAGGGAGAA<br>TGGTGAGCAAGGG           | TAATACGACTCACTATAGGGAGATT<br>GACGTTGTAGG             |
| <i>Cnn</i>           | Pimenta-Marques et al., 2016   | CG4832  | TAATACGACTCACTATAGGGAGAA<br>CCTCCAGGCGGCGCAACT      | TAATACGACTCACTATAGGGAGATGG<br>CTCGAGCGGCATCCTT       |
| <i>Spd2</i>          | Pimenta-Marques et al., 2016   | CG17286 | TAATACGACTCACTATAGGGAGAG<br>TCGCGTTCAGCCAAGCAAAGA   | TAATACGACTCACTATAGGGAGAAAT<br>CCCCACCTCCGTTAAGACTCAG |
| <i>D-Plp</i>         | Pimenta-Marques et al., 2016   | CG33957 | TAATACGACTCACTATAGGGAGAG<br>GAGCGCCTAAAGAACAGTG     | TAATACGACTCACTATAGGGAGACTG<br>ATCGAGCTGTTTGTGGA      |
| <i>Asl</i>           | Pimenta-Marques et al., 2016   | CG2919  | TAATACGACTCACTATAGGGAGAT<br>TATGGTGAATGCCTTCGAC     | TAATACGACTCACTATAGGGAGACTA<br>GCTCAGCCTGCATGATG      |
| <i>Plk4</i>          | Rodrigues-Martins et al., 2007 | CG7186  | TAATACGACTCACTATAGGGAGAA<br>TACGGGAGGAATTTAAGCAAGTC | TAATACGACTCACTATAGGGAGATTA<br>TAACCGCTCGGAAGCAGTCT   |
| <i>γ-Tubulin 23C</i> | Mahoney et al., 2006           | CG3157  | TAATACGACTCACTATAGGGGGTC<br>ACAGATCGACTATCCTCC      | TAATACGACTCACTATAGGGTTTCT<br>CATGACAGGCTACACG        |

**Supplementary Table 6: Sequences of the oligonucleotides used to generate short hairpin RNA (shRNA) targeting different *Drosophila melanogaster* gene products.** Each combination of oligos was annealed and cloned into pWALIUM22, to drive knock-down of each target gene specifically in the female germline.

| Target gene          | CG No.  | Sense (5'-3')         | Antisense (5'-3')     | Landing site     |
|----------------------|---------|-----------------------|-----------------------|------------------|
| <i>γ-Tubulin 23C</i> | CG3157  | GGACGAGATCAGTGATGTAGT | ACTACATCACTGATCTCGTCC | attPZH-86Fb (3R) |
| <i>γ-Tubulin 37C</i> | CG17566 | CGAAAGATTGCACATCCAAC  | GTTTGGATGTGCAATCTTTCG | attP2-68A4 (3L)  |

**Supplementary Table 7: Lethality assay to determine viability of the shRNA fly lines.** Number of pupae per vial in crosses between females carrying the V32-Gal4 and shRNA against *γ*-tubulin 37C and/or *γ*-tubulin 23C and w<sup>1118</sup> males. V32-Gal4 females were crossed to w<sup>1118</sup> males as control. For each genotype, four independent crosses were performed, with three technical repeats.

| X ♂ w <sup>1118</sup> | ♀ V32-Gal4 (control) | ♀ V32-Gal4; RNAi <i>γγ</i> -tubulin 37C | ♀ V32-Gal4; RNAi <i>γ</i> -tubulin 23C | ♀ V32-Gal4; RNAi <i>γ</i> -tubulin 37C::γ-tubulin 23C |
|-----------------------|----------------------|-----------------------------------------|----------------------------------------|-------------------------------------------------------|
| Cross #1              | 191/222/70           | 0/0/0                                   | 175/201/53                             | 0/0/0                                                 |
| Cross #2              | 79/94/24             | 0/0/0                                   | 71/86/30                               | 0/0/0                                                 |
| Cross #3              | 83/101/61            | 0/0/0                                   | 94/121/56                              | 0/0/0                                                 |
| Cross #4              | 150/198/33           | 0/0/0                                   | 57/112/35                              | 0/0/0                                                 |

## SUPPLEMENTARY TIME-LAPSE MOVIES

### **Movie 1 (support to Figure 1): Centriole biogenesis in a *Drosophila melanogaster* egg explant.**

Time-lapse movie of a droplet of cytosolic extract isolated from an unfertilised *Drosophila* egg overexpressing Plk4, acquired on a spinning-disk confocal microscope. The movie is a Z-projection. Centrioles are absent in the first time point and form de novo throughout the experiment detected as spots (Spd2, in green) associated with microtubule asters (magenta), reported by the microtubule associated protein Jupiter. Time (min:sec) is shown at the top left.

### **Movies 2A–D (support to Figure 2): Centrioles assemble de novo, recruit different centrosomal molecules and duplicate.**

Time-lapse movies of droplets of cytosolic extract from non-cycling unfertilised *Drosophila* eggs overexpressing Plk4, acquired on a spinning-disk confocal microscope. Videos are Z-projections showing centriole biogenesis reported by different centrosomal proteins in green – Plk4 (A), Ana1 (B), Asl (C) and Spd2 (D) – and the microtubule-associated protein Jupiter (magenta). The larger green blobs result from yolk autofluorescence, highly noticeable in the Plk4 movie. Time (min:sec) is shown at the top left of each 4 movie.

### **Movie 3 (support to Figure 6): mNeonGreen-Plk4 localisation in a syncytial *Drosophila* embryo.**

Time-lapse movie of an embryo expressing homozygous mNeonGreen-Plk4 (endogenously labeled by CRISPR, in green) and RFP-Tubulin (magenta), acquired on a spinning-disk confocal microscope, through nuclear cycles 10-13. The movie is a bleach-corrected intensity projection. Time (min:sec) is shown at the top left.
